# Supplementary material for: Rich club disturbances of the human connectome from subjective cognitive decline to Alzheimer's disease
Source: PubMed Central journal article supplement — Theranostics. 2018 May 11;8(12):3237–55. doi: 10.7150/thno.23772 (PMC6010989; doi:10.7150/thno.23772), 2018-05-11
Supplement: thnov08p3237s1.pdf [file thnov08p3237s1.pdf]

---

## Supplementary material

### Methods

#### Network topological analysis

‘Strength’, which reflected, on average, the sum of all neighboring link weights of individual nodes. Strength of a node  $i$  can be computed as the sum of the connectivity weights of the edges attached to each node  $i$  [1, 2],

$$S_i = \sum_{j \in N, i \neq j} W_{ij} \quad [\text{S1}]$$

Where  $k$  is a proportion, it varies between zero and one, where  $k=0$  indicates that no connections are present,  $k=1$  indicates that the network is fully connected, and  $0 < k < 1$  represents the fraction of all possible connections that are present in the network.

Global brain network segregation was assessed via the calculation of clustering coefficient. ‘Clustering coefficient’, a measure of the propensity of the network, formed clusters that was computed as the average fraction of triangles out of all connected triples [3]. The clustering coefficient of a node  $0 < C_i < 1$  is a ratio that defines the proportion of possible connections that actually exist between the nearest neighbors of a node, reflecting the large-scale network segregation [3, 4]

$$C_i = \sum_{i \in G} \frac{\sum_{i, h \in G} (W_{ij} W_{ih} W_{jh})^{1/3}}{k_i(k_i-1)/2} \quad [\text{S2}]$$

Where  $k_i$  is the degree of node  $i$ , and the  $W_{ij}$  is the weight between node  $i$ , and node  $j$  in the network. The mean clustering coefficient of network  $C$  is the average over each node’s clustering coefficient, reflecting the level of local connectedness of a node.

$$C = \frac{1}{N} C_i \quad [\text{S3}]$$

Brain network integration was assessed using characteristic path length. Characteristic path length represented the average of shortest paths between brain regions in the network. The increase in average path length represented loss of network integration. The characteristic path length ( $L_p$ ) is the mean minimal travel distance between nodes in the network, reflecting the large-scale integration [4, 5]

$$L_p = \frac{1}{N(N-1)} \sum_{i \neq j} \min\{L_{i,j}\} \quad [\text{S4}]$$

---

Where  $\min\{L_{i,j}\}$  is the shortest path length between the  $i$ th node and the  $j$ th node.

‘Nodal efficiency’ reflected the extent of fault tolerant and the robustness of the network after deletion of individual nodes. The local efficiency reflects how much the network is fault tolerant and show how efficient the communication is among the first neighbors of the node  $i$  when it is removed [5], which is computed as follows:

$$E_i = \frac{1}{(N-1)} \sum_{G(i)} \frac{1}{\min\{L_{i,j}\}} \quad [\text{S5}]$$

$$E = \frac{1}{N} \sum_{i \neq j} E_i \quad [\text{S6}]$$

Where  $E_i$  is the local efficiency of node  $i$ ; Where  $G_i$  denotes the subgraph composed of the nearest neighbors of node  $i$ .

### Rich club coefficient

For all individual structural networks the weighted-rich club coefficient  $\phi^w(k)$  was computed as follows [6].

- (1) All non-zero connections of the examined FABIRC -weighted network were ranked in respect to their weight, resulting in a vector  $W^{ranked}$ .
- (2) Within the connectivity matrix  $M$ , for each value of degree  $k$ , the sub-graph of nodes with a degree larger than  $k$  was selected (with  $k$  defined as the number of each node’s binary connections).
- (3) The number of links  $E_{>k}$  present between the members of the subset was determined and the sum of their collective weight  $W_{>k}$  was computed.
- (4) The maximal level of connectivity between the top number  $E_{>k}$  of connections in the network was determined, again computed as the sum of the weights.
- (5) The weighted rich club parameter  $\phi^w(k)$  was computed as the ratio between  $W_{>k}$  and this sum of the strongest number of links  $E_{>k}$  in the total network. Formally,  $\phi^w(k)$  is given by [7].

$$\phi^w(k) = \frac{W_{>k}}{\sum_{l=1}^{E_{>k}} w_l^{ranked}} \quad [\text{S7}]$$

---

$\phi^w(k)$  is typically normalized relative to a set of comparable random networks, to determine the extent to which empirically observed connection density between rich club nodes exceeds that predicted by the random null model, driven by node degree alone. Comparison of  $\phi^w(k)$  to  $\phi_{random}(k)$  obtained from a population of random networks, resulted in a normalized rich club coefficient  $\phi_{norm}$ . Formally, A normalized coefficient  $\phi_{norm}$  greater than 1 over a range of  $k$  suggests the existence of rich club organization in a network[8]. To this end, for each network, a population of  $m=1,000$  random networks[9] were computed by shuffling the links in  $M$ , preserving the weights of the connections as well as the (binary) degree sequence and thus all node degrees (including the hubs) in the network[9]. This algorithm does not preserve the weight distribution of the nodes [10]. For each random network the rich club coefficient  $\phi_{random}^w$  was computed over all levels of  $k$  and  $\phi_{random}^w(k)$  was computed as the average rich club coefficient over the 1,000 random networks. Note that the normalized rich club coefficient is invariant for an overall connectivity of the network, enabling the possibility of comparing  $\phi^w(k)$  between groups.

## Results

### Individual rich club selection

Group differences (ANCOVA; age and gender covariates) were observed in rich club connectivity strength ( $F(3,220)= 16.323, P<0.001, \eta^2= 0.182$ ). Significant reductions were in rich club connectivity strength in aMCI versus NC ( $P<0.001$ ), d-AD versus NC ( $P<0.001$ ), aMCI versus SCD ( $P<0.001$ ), d-AD versus SCD ( $P<0.001$ , **Figure S1A**).

Group differences in feeder connectivity strength ( $F(3,220)= 37.259, P<0.001$ , partial  $\eta^2= 0.506$ ). Feeder connectivity strength significantly decreased in SCD versus NC ( $P<0.001$ ), aMCI versus NC ( $P<0.001$ ), and d-AD versus aMCI ( $P<0.001$ ), no significant difference in SCD versus aMCI (**Figure S1B**).

Similar group differences were in local connectivity strength ( $F(3,220)= 83.919, P<0.001$ , partial  $\eta^2= 0.534$ ). Local connectivity strength significantly decreased in SCD versus NC ( $P<0.001$ ), d-AD versus SCD ( $P=0.045$ ), and d-AD versus aMCI ( $P<0.001$ ), no significant difference in SCD versus aMCI ( $P>0.05$ , **Figure S1C**).

### Effects of fiber length

Across all the groups of subjects, rich club connections showed the longest fibers (rich club | feeder | local, mean/std 83.175/7.86682 | 70.697/4.62046 | 62.674/4.39247; **Figure S2A**) than feeder ( $P<0.001$ ) and local connections ( $P<0.001$ ), supporting previous findings that rich club connections mostly spanned long distances and constituted a high-cost feature of brain architecture [11]. Feeder connections were

---

significantly longer than local connections ( $P < 0.001$ ). Across all the groups of subjects, the set of rich club connections (mean/std 0.427/0.02531) displayed a significantly higher level of FABIRC as compared to feeder (mean/std 0.398/0.02159) and local connections (mean/std 0.387/0.02285) ( $P < 0.001$  |  $P < 0.001$ ), suggesting a higher level of microstructural organization of rich club connections in the brain network (**Figure S2B**). Furthermore, feeder connections also showed a higher level of FABIRC than local connections ( $P < 0.001$ ).

To examine whether the observed relatively stable rich club was not just an effect of the relatively stable longer distances in SCD, an additional analysis was performed [11-13]. FABIRC measurements was corrected for influences of physical length by regressing out average fiber length across each category of connections.

The results still revealed group differences (ANCOVA; age, gender, and average fiber length across each category of connections as covariates) in rich club connectivity strength ( $F(3,220) = 13.326$ ,  $P < 0.001$ ,  $\eta^2 = 0.154$ ). Significantly lower FABIRC of rich club connectivity strength was in aMCI ( $P < 0.001$ ) and d-AD ( $P < 0.001$ ) compared to NC. In addition, significant lower FABIRC rich club connectivity strength in aMCI ( $P = 0.001$ ) and d-AD ( $P = 0.003$ ) compared to SCD was observed, and no significant group differences was observed neither between SCD with NC nor between aMCI with d-AD (**Figure S3A**)

Group differences in feeder connectivity strength ( $F(3,220) = 34.143$ ,  $P < 0.001$ , partial  $\eta^2 = 0.318$ ). Feeder connectivity strength significantly decreased in SCD versus NC ( $P = 0.005$ ), aMCI versus SCD ( $P = 0.001$ ), d-AD versus SCD ( $P < 0.001$ ), and no significant difference in d-AD versus aMCI (**Figure S3B**)

Similar group differences in local connectivity strength ( $F(3,220) = 53.406$ ,  $P < 0.001$ , partial  $\eta^2 = 0.421$ ). Local connectivity strength significantly decreased in SCD versus NC ( $P < 0.001$ ), aMCI versus SCD ( $P < 0.001$ ), d-AD versus SCD ( $P < 0.001$ ), and no significant difference in d-AD versus aMCI (**Figure S3C**)

### **Age-matched replication dataset**

#### **Rich club disturbances with disease progression**

The rich club coefficient ( $\emptyset$ ) was significantly lower in all patient groups relative to controls, but especially at low-degree k-levels: k=3-7 in SCD patients, k=4-13 in aMCI patients, and k=2-16 in d-AD patients (Bonferroni-corrected, **Table S15-16**).

Normalized rich club coefficients ( $\emptyset_{norm}$ ) were significantly higher in all patient groups relative to controls, but especially at low-degree k-levels: k=7-13 in SCD patients, k=5-12 in aMCI patients, and k=4-13,16 in d-AD patients (Bonferroni-

---

corrected, **Table S17-18**).

Significant group differences (ANOVA) were observed in rich club connectivity strength ( $F(3,220)=10.848$ ,  $P<0.001$ , partial  $\eta^2=0.153$ ), feeder connectivity strength ( $F(3,220)=55.035$ ,  $P<0.001$ , partial  $\eta^2=0.478$ ), and local connectivity strength ( $F(3,220)=96.976$ ,  $P<0.001$ , partial  $\eta^2=0.618$ ; **Table S19**). Post hoc comparisons revealed decreased local and feeder connectivity strength in the SCD group versus NC ( $P<0.001$ ), and the d-AD group versus the aMCI group ( $P<0.001$ ). There was no significant difference between aMCI group and the SCD group. Significant rich club connectivity strength reductions were seen in the d-AD patients versus NC:  $P<0.001$ ). There were no other significant differences between groups ( $P>0.05$ ; **Table S20**).

### **Network topological metrics**

Group differences (ANOVA) were observed for the strength metric ( $F(3,220)=88.561$ ,  $P<0.001$ , partial  $\eta^2=0.596$ , **Table S21**). Post hoc comparisons revealed decreased strength in the SCD group versus NC ( $P<0.001$ ), and the d-AD group versus the aMCI group ( $P<0.001$ ). There was no significant difference between aMCI group and the SCD group (**Table S22**).

Group differences (ANOVA) were observed for the clustering coefficient ( $F(3,220)=11.586$ ,  $P<0.001$ , partial  $\eta^2=0.116$ ). Significant reductions were seen in the d-AD patients versus NC:  $P<0.001$ ). There were no other significant differences between groups ( $P>0.05$ ). In addition, there were significant group differences in normalized clustering coefficient ( $F(3,220)=34.436$ ,  $P<0.001$ , partial  $\eta^2=0.365$ ). Post hoc comparisons revealed decreased normalized clustering coefficient in the SCD group versus NC ( $P<0.001$ ), and the d-AD group versus the aMCI group ( $P<0.001$ ). There was no significant difference between aMCI group and the SCD group (**Table S21-22**).

There were significant group differences in characteristic path length ( $F(3,220)=39.791$ ,  $P<0.001$ , partial  $\eta^2=0.399$ ). Post hoc comparisons revealed decreased characteristic path length in the SCD group versus NC ( $P<0.001$ ), and the d-AD group versus the aMCI group ( $P<0.001$ ). There was no significant difference between aMCI group and the SCD group. Group differences were also observed for the normalized characteristic path length ( $F(3,220)=4.365$ ,  $P=0.003$ , partial  $\eta^2=0.068$ ). There was no significant difference between groups (**Table S21-22**).

### **Behavioral correlation analysis**

In NC patients, the normalized rich club coefficient was significantly negative correlated with AVLT-D performance, after Bonferroni corrections ( $k=3$ ). In addition, in d-AD patients, normalized rich club coefficient showed a significantly negative

---

association with AVLT-D (k=2) and AVLT-R (k=6). These relationships were not observed in SCD and aMCI patients (**Table S23**). For rich club coefficient, in SCD patients, this metric was significantly positive correlated with AVLT-D performance, after Bonferroni corrections (k=5). aMCI group showed a similar positive relationship between rich club coefficient and AVLT-D (k=12-16), AVLT-I (k=3), and MoCA (k=3). In addition, in d-AD patients, rich club coefficient showed a significantly positive association with AVLT-I (k=2), MMSE (k=2,8) and MoCA (k=2). These relationships were not observed in NC (**Table S24**).

In SCD patients, the AVLT-D performance was significantly positively correlated with feeder connectivity strength after Bonferroni corrections: those people who showed poorer memory performance tended to suffer from a greater disruption of feeder connections involving peripheral regions ( $r=0.426$ ). Similar results were also found in aMCI patients ( $r=0.486$ ). This relationship seen in SCD and aMCI patients was not displayed by NC or d-AD patients (**Table S25**).

After Bonferroni corrections, in SCD patients, the AVLT-D performance was significantly negatively correlated with strength ( $r= 0.398$ ). Similar association was also between AVLT-d and characteristic path length ( $r= -0.390$ ). In aMCI patients, the AVLT-D performance was significantly negatively correlated with normalized clustering coefficient ( $r= -0.423$ ). Similar association was also between AVLT-R and clustering coefficient ( $r= 0.361$ ). These relationships were not displayed by NC and d-AD patients (**Table S26**).

After Bonferroni corrections, network topological metrics was significantly correlated with rich club/feeder/local connectivity strength (**Table S27**). Previous studies have extensively used these network topological metrics in AD studies to reveal the differences between AD patients and normal subjects. Our results showed that there is a significant correlation between white matter lesion load and network results, indicating that rich club organization analysis is reliable.

---

## References

1. Bullmore ET, Sporns O. Complex brain networks: graph theoretical analysis of structural and functional systems. *Nat Rev Neurosci.* 2009; 10: 186-98.
2. Rubinov M, Sporns O. Complex network measures of brain connectivity: Uses and interpretations. *Neuroimage.* 2010; 52: 1059-69.
3. Onnela JP, Saramaki J, Kertesz J, Kaski K. Intensity and coherence of motifs in weighted complex networks. *Phys Rev E Stat Nonlin Soft Matter Phys.* 2005; 71(2): 065103.
4. Watts DJ, Strogatz SH. Collective dynamics of 'small-world' networks. *Nature.* 1998; 393: 440-2.
5. Latora V, Marchiori M. Efficient behavior of small-world networks. *Phys Rev Lett.* 2001; 5; 87(19): 198701.
6. van den Heuvel MP, Sporns O, Collin G, Scheewe T, Mandl RCW, Cahn W, et al. Abnormal Rich Club Organization and Functional Brain Dynamics in Schizophrenia. *JAMA Psychiatry.* 2013; 70: 783-92.
7. Opsahl T, Colizza V, Panzarasa P, Ramasco JJ. Prominence and control: the weighted rich-club effect. *Phys Rev Lett.* 2008; 101: 168702.
8. Jessen F, Amariglio RE, van Boxtel M, Breteler M, Ceccaldi M, Chetelat G, et al. A conceptual framework for research on subjective cognitive decline in preclinical Alzheimer's disease. *Alzheimers Dement.* 2014; 10: 844-52.
9. Lu J, Li D, Li F, Zhou A, Wang F, Zuo X, et al. Montreal cognitive assessment in detecting cognitive impairment in Chinese elderly individuals: a population-based study. *J Geriatr Psychiatry Neurol.* 2011; 24: 184-90.
10. Maslov S, Sneppen K. Specificity and stability in topology of protein networks. *Science.* 2002; 296: 910-3.
11. van den Heuvel MP, Kahn RS, Goni J, Sporns O. High-cost, high-capacity backbone for global brain communication. *Proc Natl Acad Sci U S A.* 2012; 109: 11372-7.
12. Collin G, Sporns O, Mandl RCW, van den Heuvel MP. Structural and Functional Aspects Relating to Cost and Benefit of Rich Club Organization in the Human Cerebral Cortex. *Cereb Cortex.* 2014; 24: 2258-67.

---

13. Tuladhar AM, Lawrence A, Norris DG, Barrick TR, Markus HS, de Leeuw FE. Disruption of Rich Club Organisation in Cerebral Small Vessel Disease. *Hum Brain Mapp.* 2017; 38: 1751-66.



## Tables

Table S1. Post hoc testing on age and education from ANOVA.

| Demographics | (I) Group | (J) Group | Mean<br>Difference<br>(I-J) | SE    | P                | 95% Confidence<br>Interval for Difference |                |
|--------------|-----------|-----------|-----------------------------|-------|------------------|-------------------------------------------|----------------|
|              |           |           |                             |       |                  | Lower<br>Bound                            | Upper<br>Bound |
| Age          | NC        | SCD       | -2.059                      | 1.728 | 0.235            | -5.465                                    | 1.347          |
|              |           | aMCI      | -3.996                      | 1.618 | <b>0.014</b>     | -7.185                                    | -0.807         |
|              |           | d-AD      | -7.654                      | 1.671 | <b>&lt;0.001</b> | -10.948                                   | -4.359         |
|              | SCD       | NC        | 2.059                       | 1.728 | 0.235            | -1.347                                    | 5.465          |
|              |           | aMCI      | -1.937                      | 1.740 | 0.267            | -5.367                                    | 1.493          |
|              |           | d-AD      | -5.594                      | 1.790 | <b>0.002</b>     | -9.123                                    | -2.066         |
|              | aMCI      | NC        | 3.996                       | 1.618 | <b>0.014</b>     | 0.807                                     | 7.185          |
|              |           | SCD       | 1.937                       | 1.740 | 0.267            | -1.493                                    | 5.367          |
|              |           | d-AD      | -3.657                      | 1.684 | <b>0.031</b>     | -6.977                                    | -0.338         |
|              | d-AD      | NC        | 7.654                       | 1.671 | <b>&lt;0.001</b> | 4.359                                     | 10.948         |
|              |           | SCD       | 5.594                       | 1.790 | <b>0.002</b>     | 2.066                                     | 9.123          |
|              |           | aMCI      | 3.657                       | 1.684 | <b>0.031</b>     | 0.338                                     | 6.977          |
| Education    | NC        | SCD       | -0.751                      | 0.973 | 0.441            | -2.667                                    | 1.166          |
|              |           | aMCI      | 1.202                       | 0.911 | 0.188            | -0.593                                    | 2.996          |
|              |           | d-AD      | 2.103                       | 0.941 | <b>0.026</b>     | 0.248                                     | 3.957          |
|              | SCD       | NC        | 0.751                       | 0.973 | 0.441            | -1.166                                    | 2.667          |
|              |           | aMCI      | 1.952                       | 0.980 | <b>0.048</b>     | 0.022                                     | 3.883          |
|              |           | d-AD      | 2.853                       | 1.008 | <b>0.005</b>     | 0.867                                     | 4.839          |
|              | aMCI      | NC        | -1.202                      | 0.911 | 0.188            | -2.996                                    | 0.593          |
|              |           | SCD       | -1.952                      | 0.980 | <b>0.048</b>     | -3.883                                    | -0.022         |
|              |           | d-AD      | 0.901                       | 0.948 | 0.343            | -0.967                                    | 2.769          |
|              | d-AD      | NC        | -2.103                      | 0.941 | <b>0.026</b>     | -3.957                                    | -0.248         |
|              |           | SCD       | -2.853                      | 1.008 | <b>0.005</b>     | -4.839                                    | -0.867         |
|              |           | aMCI      | -0.901                      | 0.948 | 0.343            | -2.769                                    | 0.967          |

Table S2. Post hoc testing on cognitive variables from ANCOVA with age, gender and education as covariates.

| COV: Age & Gender & Education | (I) Group | (J) Group | Mean Difference (I-J) | SE    | P                | 95% Confidence Interval for Difference |             |
|-------------------------------|-----------|-----------|-----------------------|-------|------------------|----------------------------------------|-------------|
|                               |           |           |                       |       |                  | Lower Bound                            | Upper Bound |
|                               |           |           |                       |       |                  |                                        |             |
| AVLT-Immediate Recall Scores  | NC        | SCD       | 0.738                 | 0.344 | <b>0.033</b>     | 0.060                                  | 1.416       |
|                               |           | aMCI      | 2.687                 | 0.325 | <b>&lt;0.001</b> | 2.046                                  | 3.328       |
|                               |           | d-AD      | 5.126                 | 0.352 | <b>&lt;0.001</b> | 4.432                                  | 5.819       |
|                               | SCD       | NC        | -0.738                | 0.344 | <b>0.033</b>     | -1.416                                 | -0.060      |
|                               |           | aMCI      | 1.949                 | 0.340 | <b>&lt;0.001</b> | 1.279                                  | 2.620       |
|                               |           | d-AD      | 4.388                 | 0.363 | <b>&lt;0.001</b> | 3.671                                  | 5.104       |
|                               | aMCI      | NC        | -2.687                | 0.325 | <b>&lt;0.001</b> | -3.328                                 | -2.046      |
|                               |           | SCD       | -1.949                | 0.340 | <b>&lt;0.001</b> | -2.620                                 | -1.279      |
|                               |           | d-AD      | 2.438                 | 0.331 | <b>&lt;0.001</b> | 1.786                                  | 3.090       |
|                               | d-AD      | NC        | -5.126                | 0.352 | <b>&lt;0.001</b> | -5.819                                 | -4.432      |
|                               |           | SCD       | -4.388                | 0.363 | <b>&lt;0.001</b> | -5.104                                 | -3.671      |
|                               |           | aMCI      | -2.438                | 0.331 | <b>&lt;0.001</b> | -3.090                                 | -1.786      |
| AVLT-Delayed Recall Scores    | NC        | SCD       | 1.285                 | 0.527 | <b>0.016</b>     | 0.246                                  | 2.324       |
|                               |           | aMCI      | 5.589                 | 0.498 | <b>&lt;0.001</b> | 4.606                                  | 6.571       |
|                               |           | d-AD      | 8.208                 | 0.539 | <b>&lt;0.001</b> | 7.144                                  | 9.271       |
|                               | SCD       | NC        | -1.285                | 0.527 | <b>0.016</b>     | -2.324                                 | -0.246      |
|                               |           | aMCI      | 4.303                 | 0.521 | <b>&lt;0.001</b> | 3.276                                  | 5.331       |
|                               |           | d-AD      | 6.923                 | 0.557 | <b>&lt;0.001</b> | 5.824                                  | 8.021       |
|                               | aMCI      | NC        | -5.589                | 0.498 | <b>&lt;0.001</b> | -6.571                                 | -4.606      |
|                               |           | SCD       | -4.303                | 0.521 | <b>&lt;0.001</b> | -5.331                                 | -3.276      |
|                               |           | d-AD      | 2.619                 | 0.507 | <b>&lt;0.001</b> | 1.620                                  | 3.619       |
|                               | d-AD      | NC        | -8.208                | 0.539 | <b>&lt;0.001</b> | -9.271                                 | -7.144      |
|                               |           | SCD       | -6.923                | 0.557 | <b>&lt;0.001</b> | -8.021                                 | -5.824      |
|                               |           | aMCI      | -2.619                | 0.507 | <b>&lt;0.001</b> | -3.619                                 | -1.620      |
| AVLT-Recognition Scores       | NC        | SCD       | 0.738                 | 0.630 | 0.243            | -0.504                                 | 1.980       |
|                               |           | aMCI      | 3.785                 | 0.596 | <b>&lt;0.001</b> | 2.611                                  | 4.960       |
|                               |           | d-AD      | 7.622                 | 0.645 | <b>&lt;0.001</b> | 6.351                                  | 8.894       |
|                               | SCD       | NC        | -0.738                | 0.630 | 0.243            | -1.980                                 | 0.504       |
|                               |           | aMCI      | 3.047                 | 0.623 | <b>&lt;0.001</b> | 1.819                                  | 4.276       |
|                               |           | d-AD      | 6.884                 | 0.666 | <b>&lt;0.001</b> | 5.571                                  | 8.198       |
|                               | aMCI      | NC        | -3.785                | 0.596 | <b>&lt;0.001</b> | -4.960                                 | -2.611      |
|                               |           | SCD       | -3.047                | 0.623 | <b>&lt;0.001</b> | -4.276                                 | -1.819      |
|                               |           | d-AD      | 3.837                 | 0.606 | <b>&lt;0.001</b> | 2.642                                  | 5.032       |
|                               | d-AD      | NC        | -7.622                | 0.645 | <b>&lt;0.001</b> | -8.894                                 | -6.351      |
|                               |           | SCD       | -6.884                | 0.666 | <b>&lt;0.001</b> | -8.198                                 | -5.571      |
|                               |           | aMCI      | -3.837                | 0.606 | <b>&lt;0.001</b> | -5.032                                 | -2.642      |
| MMSE                          | NC        | SCD       | 0.238                 | 0.758 | 0.754            | -1.257                                 | 1.733       |
|                               |           | aMCI      | 2.751                 | 0.717 | <b>&lt;0.001</b> | 1.337                                  | 4.166       |
|                               |           | d-AD      | 10.110                | 0.776 | <b>&lt;0.001</b> | 8.579                                  | 11.640      |

|  |      |      |         |       |                  |         |         |
|--|------|------|---------|-------|------------------|---------|---------|
|  |      | NC   | -0.238  | 0.758 | 0.754            | -1.733  | 1.257   |
|  | SCD  | aMCI | 2.513   | 0.750 | <b>0.001</b>     | 1.034   | 3.992   |
|  |      | d-AD | 9.872   | 0.802 | <b>&lt;0.001</b> | 8.291   | 11.453  |
|  |      | NC   | -2.751  | 0.717 | <b>&lt;0.001</b> | -4.166  | -1.337  |
|  | aMCI | SCD  | -2.513  | 0.750 | <b>0.001</b>     | -3.992  | -1.034  |
|  |      | d-AD | 7.358   | 0.730 | <b>&lt;0.001</b> | 5.920   | 8.797   |
|  |      | NC   | -10.110 | 0.776 | <b>&lt;0.001</b> | -11.640 | -8.579  |
|  | d-AD | SCD  | -9.872  | 0.802 | <b>&lt;0.001</b> | -11.453 | -8.291  |
|  |      | aMCI | -7.358  | 0.730 | <b>&lt;0.001</b> | -8.797  | -5.920  |
|  |      | SCD  | 1.422   | 0.698 | <b>0.043</b>     | 0.046   | 2.798   |
|  | NC   | aMCI | 5.981   | 0.660 | <b>&lt;0.001</b> | 4.679   | 7.282   |
|  |      | d-AD | 12.466  | 0.714 | <b>&lt;0.001</b> | 11.057  | 13.874  |
|  |      | NC   | -1.422  | 0.698 | <b>0.043</b>     | -2.798  | -0.046  |
|  | SCD  | aMCI | 4.558   | 0.690 | <b>&lt;0.001</b> | 3.197   | 5.919   |
|  |      | d-AD | 11.043  | 0.738 | <b>&lt;0.001</b> | 9.588   | 12.499  |
|  |      | NC   | -5.981  | 0.660 | <b>&lt;0.001</b> | -7.282  | -4.679  |
|  | aMCI | SCD  | -4.558  | 0.690 | <b>&lt;0.001</b> | -5.919  | -3.197  |
|  |      | d-AD | 6.485   | 0.671 | <b>&lt;0.001</b> | 5.161   | 7.809   |
|  |      | NC   | -12.466 | 0.714 | <b>&lt;0.001</b> | -13.874 | -11.057 |
|  | d-AD | SCD  | -11.043 | 0.738 | <b>&lt;0.001</b> | -12.499 | -9.588  |
|  |      | aMCI | -6.485  | 0.671 | <b>&lt;0.001</b> | -7.809  | -5.161  |

MoCA

Table S3. Rich club coefficient.

| k<br>(degree) | NC    |       | SCD   |       | aMCI  |       | d-AD  |       | F      | p <sup>a</sup> | Es <sup>b</sup> | Post hocs <sup>c</sup> |
|---------------|-------|-------|-------|-------|-------|-------|-------|-------|--------|----------------|-----------------|------------------------|
|               | Mean  | SD    | Mean  | SD    | Mean  | SD    | Mean  | SD    |        |                |                 |                        |
| 1             | 0.999 | 0.000 | 0.999 | 0.001 | 0.999 | 0.001 | 0.999 | 0.001 | 6.048  | <0.001         | 0.077           | NC>d-AD                |
| 2             | 0.998 | 0.001 | 0.997 | 0.002 | 0.997 | 0.002 | 0.996 | 0.003 | 14.656 | <0.001         | 0.168           | NC, SCD, aMCI>d-AD     |
| 3             | 0.996 | 0.003 | 0.993 | 0.004 | 0.993 | 0.004 | 0.989 | 0.005 | 26.453 | <0.001         | 0.267           | NC>SCD, aMCI>d-AD      |
| 4             | 0.992 | 0.004 | 0.986 | 0.006 | 0.984 | 0.006 | 0.978 | 0.007 | 45.085 | <0.001         | 0.383           | NC>SCD, aMCI>d-AD      |
| 5             | 0.985 | 0.006 | 0.975 | 0.008 | 0.973 | 0.008 | 0.963 | 0.010 | 66.922 | <0.001         | 0.479           | NC>SCD, aMCI>d-AD      |
| 6             | 0.974 | 0.008 | 0.962 | 0.011 | 0.959 | 0.009 | 0.945 | 0.013 | 68.930 | <0.001         | 0.487           | NC>SCD, aMCI>d-AD      |
| 7             | 0.961 | 0.009 | 0.948 | 0.012 | 0.943 | 0.012 | 0.925 | 0.017 | 67.637 | <0.001         | 0.482           | NC>SCD, aMCI>d-AD      |
| 8             | 0.945 | 0.011 | 0.933 | 0.014 | 0.925 | 0.013 | 0.906 | 0.022 | 53.441 | <0.001         | 0.424           | NC>SCD, aMCI>d-AD      |
| 9             | 0.929 | 0.011 | 0.918 | 0.015 | 0.909 | 0.017 | 0.886 | 0.027 | 45.661 | <0.001         | 0.386           | NC>aMCI>d-AD; SCD>d-AD |
| 10            | 0.914 | 0.012 | 0.902 | 0.015 | 0.893 | 0.019 | 0.868 | 0.028 | 47.527 | <0.001         | 0.395           | NC>aMCI>d-AD; SCD>d-AD |
| 11            | 0.898 | 0.014 | 0.886 | 0.018 | 0.877 | 0.022 | 0.849 | 0.034 | 38.875 | <0.001         | 0.349           | NC>aMCI>d-AD; SCD>d-AD |
| 12            | 0.883 | 0.016 | 0.870 | 0.025 | 0.859 | 0.025 | 0.827 | 0.043 | 32.090 | <0.001         | 0.306           | NC>aMCI>d-AD; SCD>d-AD |
| 13            | 0.867 | 0.020 | 0.851 | 0.033 | 0.841 | 0.031 | 0.810 | 0.048 | 22.093 | <0.001         | 0.233           | NC>aMCI>d-AD; SCD>d-AD |
| 14            | 0.854 | 0.024 | 0.835 | 0.039 | 0.820 | 0.040 | 0.785 | 0.065 | 19.727 | <0.001         | 0.214           | NC>aMCI>d-AD; SCD>d-AD |
| 15            | 0.838 | 0.025 | 0.817 | 0.045 | 0.803 | 0.043 | 0.766 | 0.068 | 18.648 | <0.001         | 0.204           | NC>aMCI>d-AD; SCD>d-AD |
| 16            | 0.823 | 0.029 | 0.801 | 0.054 | 0.787 | 0.046 | 0.756 | 0.062 | 13.803 | <0.001         | 0.160           | NC, SCD>d-AD           |

<sup>a</sup> Values from ANCOVA with age and gender as covariates.

<sup>b</sup> Effect size; partial  $\eta^2$  for rich club coefficient.

<sup>c</sup> Least significant difference; post hoc testing on rich club coefficient based on means adjusted for age, gender.

aMCI: amnesic mild cognitive impairment; d-AD: dementia of Alzheimer's disease;  
NC: normal control; SCD: subjective cognitive decline.

Table S4. Post hoc testing on rich club coefficient from ANCOVA with age and gender as covariates (Bonferroni-corrected for groups).

| k<br>(degree) | (I)<br>Group | (J)<br>Group | Mean<br>Difference<br>(I-J) | SE    | P                | 95% Confidence<br>Interval for Difference |                |
|---------------|--------------|--------------|-----------------------------|-------|------------------|-------------------------------------------|----------------|
|               |              |              |                             |       |                  | Lower<br>Bound                            | Upper<br>Bound |
| 1             | NC           | SCD          | 0.000                       | 0.000 | 1.000            | 0.000                                     | 0.001          |
|               |              | aMCI         | 0.000                       | 0.000 | 1.000            | 0.000                                     | 0.001          |
|               |              | d-AD         | 0.001                       | 0.000 | <b>&lt;0.001</b> | 0.000                                     | 0.001          |
|               | SCD          | NC           | 0.000                       | 0.000 | 1.000            | -0.001                                    | 0.000          |
|               |              | aMCI         | 0.000                       | 0.000 | 1.000            | 0.000                                     | 0.000          |
|               |              | d-AD         | 0.000                       | 0.000 | <b>0.024</b>     | 0.000                                     | 0.001          |
|               | aMCI         | NC           | 0.000                       | 0.000 | 1.000            | -0.001                                    | 0.000          |
|               |              | SCD          | 0.000                       | 0.000 | 1.000            | 0.000                                     | 0.000          |
|               |              | d-AD         | 0.000                       | 0.000 | <b>0.016</b>     | 0.000                                     | 0.001          |
|               | d-AD         | NC           | -0.001                      | 0.000 | <b>&lt;0.001</b> | -0.001                                    | 0.000          |
|               |              | SCD          | 0.000                       | 0.000 | <b>0.024</b>     | -0.001                                    | 0.000          |
|               |              | aMCI         | 0.000                       | 0.000 | <b>0.016</b>     | -0.001                                    | 0.000          |
| 2             | NC           | SCD          | 0.001                       | 0.000 | <b>0.042</b>     | 0.000                                     | 0.002          |
|               |              | aMCI         | 0.001                       | 0.000 | <b>0.017</b>     | 0.000                                     | 0.002          |
|               |              | d-AD         | 0.003                       | 0.000 | <b>&lt;0.001</b> | 0.002                                     | 0.004          |
|               | SCD          | NC           | -0.001                      | 0.000 | <b>0.042</b>     | -0.002                                    | 0.000          |
|               |              | aMCI         | 0.000                       | 0.000 | 1.000            | -0.001                                    | 0.001          |
|               |              | d-AD         | 0.001                       | 0.000 | <b>0.002</b>     | 0.000                                     | 0.003          |
|               | aMCI         | NC           | -0.001                      | 0.000 | <b>0.017</b>     | -0.002                                    | 0.000          |
|               |              | SCD          | 0.000                       | 0.000 | 1.000            | -0.001                                    | 0.001          |
|               |              | d-AD         | 0.001                       | 0.000 | <b>0.001</b>     | 0.000                                     | 0.002          |
|               | d-AD         | NC           | -0.003                      | 0.000 | <b>&lt;0.001</b> | -0.004                                    | -0.002         |
|               |              | SCD          | -0.001                      | 0.000 | <b>0.002</b>     | -0.003                                    | 0.000          |
|               |              | aMCI         | -0.001                      | 0.000 | <b>0.001</b>     | -0.002                                    | 0.000          |
| 3             | NC           | SCD          | 0.003                       | 0.001 | <b>0.002</b>     | 0.001                                     | 0.005          |
|               |              | aMCI         | 0.003                       | 0.001 | <b>0.001</b>     | 0.001                                     | 0.005          |
|               |              | d-AD         | 0.007                       | 0.001 | <b>&lt;0.001</b> | 0.005                                     | 0.009          |
|               | SCD          | NC           | -0.003                      | 0.001 | <b>0.002</b>     | -0.005                                    | -0.001         |
|               |              | aMCI         | 0.000                       | 0.001 | 1.000            | -0.002                                    | 0.002          |
|               |              | d-AD         | 0.004                       | 0.001 | <b>&lt;0.001</b> | 0.002                                     | 0.006          |
|               | aMCI         | NC           | -0.003                      | 0.001 | <b>0.001</b>     | -0.005                                    | -0.001         |
|               |              | SCD          | 0.000                       | 0.001 | 1.000            | -0.002                                    | 0.002          |
|               |              | d-AD         | 0.004                       | 0.001 | <b>&lt;0.001</b> | 0.002                                     | 0.006          |
|               | d-AD         | NC           | -0.007                      | 0.001 | <b>&lt;0.001</b> | -0.009                                    | -0.005         |
|               |              | SCD          | -0.004                      | 0.001 | <b>&lt;0.001</b> | -0.006                                    | -0.002         |
|               |              | aMCI         | -0.004                      | 0.001 | <b>&lt;0.001</b> | -0.006                                    | -0.002         |
| 4             | NC           | SCD          | 0.006                       | 0.001 | <b>&lt;0.001</b> | 0.003                                     | 0.009          |
|               |              | aMCI         | 0.007                       | 0.001 | <b>&lt;0.001</b> | 0.004                                     | 0.010          |
|               |              | d-AD         | 0.013                       | 0.001 | <b>&lt;0.001</b> | 0.010                                     | 0.016          |

|   |      |      |        |       |                  |        |        |
|---|------|------|--------|-------|------------------|--------|--------|
|   |      | NC   | -0.006 | 0.001 | <b>&lt;0.001</b> | -0.009 | -0.003 |
|   | SCD  | aMCI | 0.001  | 0.001 | 1.000            | -0.002 | 0.004  |
|   |      | d-AD | 0.007  | 0.001 | <b>&lt;0.001</b> | 0.004  | 0.010  |
|   |      | NC   | -0.007 | 0.001 | <b>&lt;0.001</b> | -0.010 | -0.004 |
|   | aMCI | SCD  | -0.001 | 0.001 | 1.000            | -0.004 | 0.002  |
|   |      | d-AD | 0.006  | 0.001 | <b>&lt;0.001</b> | 0.003  | 0.009  |
|   |      | NC   | -0.013 | 0.001 | <b>&lt;0.001</b> | -0.016 | -0.010 |
|   | d-AD | SCD  | -0.007 | 0.001 | <b>&lt;0.001</b> | -0.010 | -0.004 |
|   |      | aMCI | -0.006 | 0.001 | <b>&lt;0.001</b> | -0.009 | -0.003 |
|   |      | SCD  | 0.009  | 0.001 | <b>&lt;0.001</b> | 0.005  | 0.013  |
|   | NC   | aMCI | 0.011  | 0.001 | <b>&lt;0.001</b> | 0.008  | 0.015  |
|   |      | d-AD | 0.021  | 0.001 | <b>&lt;0.001</b> | 0.017  | 0.025  |
|   |      | NC   | -0.009 | 0.001 | <b>&lt;0.001</b> | -0.013 | -0.005 |
|   | SCD  | aMCI | 0.002  | 0.001 | 1.000            | -0.002 | 0.006  |
|   |      | d-AD | 0.011  | 0.002 | <b>&lt;0.001</b> | 0.007  | 0.016  |
| 5 |      | NC   | -0.011 | 0.001 | <b>&lt;0.001</b> | -0.015 | -0.008 |
|   | aMCI | SCD  | -0.002 | 0.001 | 1.000            | -0.006 | 0.002  |
|   |      | d-AD | 0.009  | 0.001 | <b>&lt;0.001</b> | 0.006  | 0.013  |
|   |      | NC   | -0.021 | 0.001 | <b>&lt;0.001</b> | -0.025 | -0.017 |
|   | d-AD | SCD  | -0.011 | 0.002 | <b>&lt;0.001</b> | -0.016 | -0.007 |
|   |      | aMCI | -0.009 | 0.001 | <b>&lt;0.001</b> | -0.013 | -0.006 |
|   |      | SCD  | 0.012  | 0.002 | <b>&lt;0.001</b> | 0.007  | 0.017  |
|   | NC   | aMCI | 0.015  | 0.002 | <b>&lt;0.001</b> | 0.010  | 0.020  |
|   |      | d-AD | 0.028  | 0.002 | <b>&lt;0.001</b> | 0.023  | 0.033  |
|   |      | NC   | -0.012 | 0.002 | <b>&lt;0.001</b> | -0.017 | -0.007 |
|   | SCD  | aMCI | 0.003  | 0.002 | 0.720            | -0.002 | 0.008  |
|   |      | d-AD | 0.016  | 0.002 | 0.000            | 0.011  | 0.022  |
| 6 |      | NC   | -0.015 | 0.002 | <b>&lt;0.001</b> | -0.020 | -0.010 |
|   | aMCI | SCD  | -0.003 | 0.002 | 0.720            | -0.008 | 0.002  |
|   |      | d-AD | 0.013  | 0.002 | <b>&lt;0.001</b> | 0.008  | 0.018  |
|   |      | NC   | -0.028 | 0.002 | <b>&lt;0.001</b> | -0.033 | -0.023 |
|   | d-AD | SCD  | -0.016 | 0.002 | <b>&lt;0.001</b> | -0.022 | -0.011 |
|   |      | aMCI | -0.013 | 0.002 | <b>&lt;0.001</b> | -0.018 | -0.008 |
|   |      | SCD  | 0.013  | 0.002 | <b>&lt;0.001</b> | 0.006  | 0.019  |
|   | NC   | aMCI | 0.017  | 0.002 | <b>&lt;0.001</b> | 0.011  | 0.023  |
|   |      | d-AD | 0.034  | 0.002 | <b>&lt;0.001</b> | 0.028  | 0.041  |
|   |      | NC   | -0.013 | 0.002 | <b>&lt;0.001</b> | -0.019 | -0.006 |
|   | SCD  | aMCI | 0.005  | 0.002 | 0.352            | -0.002 | 0.011  |
|   |      | d-AD | 0.022  | 0.003 | <b>&lt;0.001</b> | 0.015  | 0.029  |
| 7 |      | NC   | -0.017 | 0.002 | <b>&lt;0.001</b> | -0.023 | -0.011 |
|   | aMCI | SCD  | -0.005 | 0.002 | 0.352            | -0.011 | 0.002  |
|   |      | d-AD | 0.017  | 0.002 | <b>&lt;0.001</b> | 0.011  | 0.024  |
|   |      | NC   | -0.034 | 0.002 | <b>&lt;0.001</b> | -0.041 | -0.028 |
|   | d-AD | SCD  | -0.022 | 0.003 | <b>&lt;0.001</b> | -0.029 | -0.015 |
|   |      | aMCI | -0.017 | 0.002 | <b>&lt;0.001</b> | -0.024 | -0.011 |
| 8 |      | SCD  | 0.011  | 0.003 | <b>0.002</b>     | 0.003  | 0.019  |
|   | NC   | aMCI | 0.019  | 0.003 | <b>&lt;0.001</b> | 0.011  | 0.026  |

|    |      |      |        |       |                |        |        |
|----|------|------|--------|-------|----------------|--------|--------|
|    |      | d-AD | 0.037  | 0.003 | < <b>0.001</b> | 0.029  | 0.045  |
|    | SCD  | NC   | -0.011 | 0.003 | <b>0.002</b>   | -0.019 | -0.003 |
|    |      | aMCI | 0.008  | 0.003 | 0.078          | 0.000  | 0.016  |
|    |      | d-AD | 0.026  | 0.003 | < <b>0.001</b> | 0.018  | 0.035  |
|    | aMCI | NC   | -0.019 | 0.003 | < <b>0.001</b> | -0.026 | -0.011 |
|    |      | SCD  | -0.008 | 0.003 | 0.078          | -0.016 | 0.000  |
|    |      | d-AD | 0.019  | 0.003 | < <b>0.001</b> | 0.011  | 0.027  |
|    | d-AD | NC   | -0.037 | 0.003 | < <b>0.001</b> | -0.045 | -0.029 |
|    |      | SCD  | -0.026 | 0.003 | < <b>0.001</b> | -0.035 | -0.018 |
|    |      | aMCI | -0.019 | 0.003 | < <b>0.001</b> | -0.027 | -0.011 |
| 9  | NC   | SCD  | 0.011  | 0.004 | <b>0.019</b>   | 0.001  | 0.020  |
|    |      | aMCI | 0.019  | 0.003 | < <b>0.001</b> | 0.010  | 0.028  |
|    |      | d-AD | 0.040  | 0.004 | < <b>0.001</b> | 0.031  | 0.050  |
|    | SCD  | NC   | -0.011 | 0.004 | <b>0.019</b>   | -0.020 | -0.001 |
|    |      | aMCI | 0.008  | 0.004 | 0.134          | -0.001 | 0.018  |
|    |      | d-AD | 0.030  | 0.004 | < <b>0.001</b> | 0.020  | 0.040  |
|    | aMCI | NC   | -0.019 | 0.003 | < <b>0.001</b> | -0.028 | -0.010 |
|    |      | SCD  | -0.008 | 0.004 | 0.134          | -0.018 | 0.001  |
|    |      | d-AD | 0.021  | 0.003 | < <b>0.001</b> | 0.012  | 0.031  |
|    | d-AD | NC   | -0.040 | 0.004 | < <b>0.001</b> | -0.050 | -0.031 |
|    |      | SCD  | -0.030 | 0.004 | < <b>0.001</b> | -0.040 | -0.020 |
|    |      | aMCI | -0.021 | 0.003 | < <b>0.001</b> | -0.031 | -0.012 |
| 10 | NC   | SCD  | 0.011  | 0.004 | <b>0.028</b>   | 0.001  | 0.021  |
|    |      | aMCI | 0.020  | 0.004 | < <b>0.001</b> | 0.010  | 0.029  |
|    |      | d-AD | 0.044  | 0.004 | < <b>0.001</b> | 0.034  | 0.054  |
|    | SCD  | NC   | -0.011 | 0.004 | <b>0.028</b>   | -0.021 | -0.001 |
|    |      | aMCI | 0.009  | 0.004 | 0.098          | -0.001 | 0.019  |
|    |      | d-AD | 0.033  | 0.004 | < <b>0.001</b> | 0.022  | 0.043  |
|    | aMCI | NC   | -0.020 | 0.004 | < <b>0.001</b> | -0.029 | -0.010 |
|    |      | SCD  | -0.009 | 0.004 | 0.098          | -0.019 | 0.001  |
|    |      | d-AD | 0.024  | 0.004 | < <b>0.001</b> | 0.014  | 0.033  |
|    | d-AD | NC   | -0.044 | 0.004 | < <b>0.001</b> | -0.054 | -0.034 |
|    |      | SCD  | -0.033 | 0.004 | < <b>0.001</b> | -0.043 | -0.022 |
|    |      | aMCI | -0.024 | 0.004 | < <b>0.001</b> | -0.033 | -0.014 |
| 11 | NC   | SCD  | 0.012  | 0.005 | <b>0.043</b>   | 0.000  | 0.024  |
|    |      | aMCI | 0.020  | 0.004 | < <b>0.001</b> | 0.009  | 0.032  |
|    |      | d-AD | 0.047  | 0.004 | < <b>0.001</b> | 0.035  | 0.059  |
|    | SCD  | NC   | -0.012 | 0.005 | <b>0.043</b>   | -0.024 | 0.000  |
|    |      | aMCI | 0.008  | 0.005 | 0.447          | -0.004 | 0.020  |
|    |      | d-AD | 0.035  | 0.005 | < <b>0.001</b> | 0.023  | 0.048  |
|    | aMCI | NC   | -0.020 | 0.004 | < <b>0.001</b> | -0.032 | -0.009 |
|    |      | SCD  | -0.008 | 0.005 | 0.447          | -0.020 | 0.004  |
|    |      | d-AD | 0.027  | 0.004 | < <b>0.001</b> | 0.015  | 0.039  |
|    | d-AD | NC   | -0.047 | 0.004 | < <b>0.001</b> | -0.059 | -0.035 |
|    |      | SCD  | -0.035 | 0.005 | < <b>0.001</b> | -0.048 | -0.023 |
|    |      | aMCI | -0.027 | 0.004 | < <b>0.001</b> | -0.039 | -0.015 |
|    |      | SCD  | 0.013  | 0.006 | 0.145          | -0.002 | 0.028  |

|      |      |        |        |        |        |        |        |
|------|------|--------|--------|--------|--------|--------|--------|
| 12   | NC   | aMCI   | 0.023  | 0.005  | <0.001 | 0.008  | 0.037  |
|      |      | d-AD   | 0.053  | 0.006  | <0.001 | 0.038  | 0.068  |
|      |      | NC     | -0.013 | 0.006  | 0.145  | -0.028 | 0.002  |
|      | SCD  | aMCI   | 0.010  | 0.006  | 0.506  | -0.005 | 0.025  |
|      |      | d-AD   | 0.041  | 0.006  | <0.001 | 0.025  | 0.056  |
|      |      | NC     | -0.023 | 0.005  | <0.001 | -0.037 | -0.008 |
|      | aMCI | SCD    | -0.010 | 0.006  | 0.506  | -0.025 | 0.005  |
|      |      | d-AD   | 0.031  | 0.005  | <0.001 | 0.016  | 0.045  |
|      |      | NC     | -0.053 | 0.006  | <0.001 | -0.068 | -0.038 |
| d-AD | SCD  | -0.041 | 0.006  | <0.001 | -0.056 | -0.025 |        |
|      | aMCI | -0.031 | 0.005  | <0.001 | -0.045 | -0.016 |        |
|      | SCD  | 0.015  | 0.007  | 0.162  | -0.003 | 0.032  |        |
| 13   | NC   | aMCI   | 0.023  | 0.006  | <0.001 | 0.006  | 0.040  |
|      |      | d-AD   | 0.052  | 0.007  | <0.001 | 0.035  | 0.070  |
|      |      | NC     | -0.015 | 0.007  | 0.162  | -0.032 | 0.003  |
|      | SCD  | aMCI   | 0.008  | 0.007  | 1.000  | -0.009 | 0.026  |
|      |      | d-AD   | 0.038  | 0.007  | <0.001 | 0.019  | 0.056  |
|      |      | NC     | -0.023 | 0.006  | <0.001 | -0.040 | -0.006 |
|      | aMCI | SCD    | -0.008 | 0.007  | 1.000  | -0.026 | 0.009  |
|      |      | d-AD   | 0.029  | 0.006  | <0.001 | 0.012  | 0.046  |
|      |      | NC     | -0.052 | 0.007  | <0.001 | -0.070 | -0.035 |
| d-AD | SCD  | -0.038 | 0.007  | <0.001 | -0.056 | -0.019 |        |
|      | aMCI | -0.029 | 0.006  | <0.001 | -0.046 | -0.012 |        |
|      | SCD  | 0.018  | 0.009  | 0.240  | -0.005 | 0.040  |        |
| 14   | NC   | aMCI   | 0.031  | 0.008  | 0.001  | 0.009  | 0.052  |
|      |      | d-AD   | 0.064  | 0.008  | <0.001 | 0.041  | 0.086  |
|      |      | NC     | -0.018 | 0.009  | 0.240  | -0.040 | 0.005  |
|      | SCD  | aMCI   | 0.013  | 0.009  | 0.749  | -0.010 | 0.036  |
|      |      | d-AD   | 0.046  | 0.009  | <0.001 | 0.022  | 0.070  |
|      |      | NC     | -0.031 | 0.008  | 0.001  | -0.052 | -0.009 |
|      | aMCI | SCD    | -0.013 | 0.009  | 0.749  | -0.036 | 0.010  |
|      |      | d-AD   | 0.033  | 0.008  | 0.001  | 0.011  | 0.055  |
|      |      | NC     | -0.064 | 0.008  | <0.001 | -0.086 | -0.041 |
| d-AD | SCD  | -0.046 | 0.009  | <0.001 | -0.070 | -0.022 |        |
|      | aMCI | -0.033 | 0.008  | 0.001  | -0.055 | -0.011 |        |
|      | SCD  | 0.019  | 0.009  | 0.234  | -0.005 | 0.043  |        |
| 15   | NC   | aMCI   | 0.031  | 0.009  | 0.002  | 0.008  | 0.054  |
|      |      | d-AD   | 0.066  | 0.009  | <0.001 | 0.042  | 0.090  |
|      |      | NC     | -0.019 | 0.009  | 0.234  | -0.043 | 0.005  |
|      | SCD  | aMCI   | 0.013  | 0.009  | 1.000  | -0.012 | 0.037  |
|      |      | d-AD   | 0.047  | 0.009  | <0.001 | 0.022  | 0.073  |
|      |      | NC     | -0.031 | 0.009  | 0.002  | -0.054 | -0.008 |
|      | aMCI | SCD    | -0.013 | 0.009  | 1.000  | -0.037 | 0.012  |
|      |      | d-AD   | 0.035  | 0.009  | 0.001  | 0.011  | 0.058  |
|      |      | NC     | -0.066 | 0.009  | <0.001 | -0.090 | -0.042 |
| d-AD | SCD  | -0.047 | 0.009  | <0.001 | -0.073 | -0.022 |        |
|      | aMCI | -0.035 | 0.009  | 0.001  | -0.058 | -0.011 |        |



---

|    |      |      |        |       |                  |        |        |
|----|------|------|--------|-------|------------------|--------|--------|
|    |      | SCD  | 0.020  | 0.009 | 0.207            | -0.005 | 0.044  |
|    | NC   | aMCI | 0.031  | 0.009 | <b>0.003</b>     | 0.007  | 0.054  |
|    |      | d-AD | 0.059  | 0.009 | <b>&lt;0.001</b> | 0.034  | 0.083  |
|    |      | NC   | -0.020 | 0.009 | 0.207            | -0.044 | 0.005  |
|    | SCD  | aMCI | 0.011  | 0.009 | 1.000            | -0.014 | 0.036  |
|    |      | d-AD | 0.039  | 0.010 | <b>0.001</b>     | 0.013  | 0.065  |
| 16 |      | NC   | -0.031 | 0.009 | <b>0.003</b>     | -0.054 | -0.007 |
|    | aMCI | SCD  | -0.011 | 0.009 | 1.000            | -0.036 | 0.014  |
|    |      | d-AD | 0.028  | 0.009 | <b>0.015</b>     | 0.004  | 0.052  |
|    |      | NC   | -0.059 | 0.009 | <b>&lt;0.001</b> | -0.083 | -0.034 |
|    | d-AD | SCD  | -0.039 | 0.010 | <b>0.001</b>     | -0.065 | -0.013 |
|    |      | aMCI | -0.028 | 0.009 | <b>0.015</b>     | -0.052 | -0.004 |

---

Table S5. Normalized rich club coefficient.

| k<br>(degree) | NC    |       | SCD   |       | aMCI  |       | d-AD  |       | F      | p <sup>a</sup> | Es <sup>b</sup> | Post hoc <sup>c</sup>   |
|---------------|-------|-------|-------|-------|-------|-------|-------|-------|--------|----------------|-----------------|-------------------------|
|               | Mean  | SD    | Mean  | SD    | Mean  | SD    | Mean  | SD    |        |                |                 |                         |
| 1             | 1.000 | 0.000 | 1.000 | 0.000 | 1.000 | 0.000 | 1.000 | 0.000 | 0.843  | 0.472          | 0.013           | -                       |
| 2             | 1.001 | 0.001 | 1.001 | 0.001 | 1.001 | 0.001 | 1.001 | 0.001 | 3.464  | 0.017          | 0.051           | -                       |
| 3             | 1.001 | 0.001 | 1.002 | 0.002 | 1.002 | 0.001 | 1.003 | 0.002 | 6.095  | <0.001         | 0.086           | NC<d-AD                 |
| 4             | 1.002 | 0.002 | 1.003 | 0.003 | 1.004 | 0.003 | 1.006 | 0.004 | 14.162 | <0.001         | 0.180           | NC, SCD<d-AD            |
| 5             | 1.003 | 0.002 | 1.005 | 0.004 | 1.007 | 0.003 | 1.009 | 0.005 | 20.561 | <0.001         | 0.241           | NC<aMCI, d-AD; SCD<d-AD |
| 6             | 1.004 | 0.003 | 1.007 | 0.005 | 1.010 | 0.005 | 1.015 | 0.008 | 33.989 | <0.001         | 0.345           | NC<aMCI<d-AD; SCD<d-AD  |
| 7             | 1.006 | 0.004 | 1.010 | 0.007 | 1.015 | 0.006 | 1.021 | 0.011 | 32.910 | <0.001         | 0.337           | NC<aMCI, d-AD; SCD<d-AD |
| 8             | 1.008 | 0.004 | 1.016 | 0.007 | 1.021 | 0.008 | 1.027 | 0.013 | 37.332 | <0.001         | 0.366           | NC<aMCI; NC<SCD<d-AD    |
| 9             | 1.011 | 0.006 | 1.022 | 0.009 | 1.025 | 0.011 | 1.032 | 0.015 | 32.025 | <0.001         | 0.331           | NC<aMCI; NC<SCD<d-AD    |
| 10            | 1.015 | 0.007 | 1.027 | 0.010 | 1.031 | 0.013 | 1.037 | 0.016 | 28.020 | <0.001         | 0.302           | NC<aMCI; NC<SCD<d-AD    |
| 11            | 1.018 | 0.008 | 1.032 | 0.013 | 1.034 | 0.015 | 1.040 | 0.019 | 20.707 | <0.001         | 0.243           | NC<SCD, aMCI, d-AD      |
| 12            | 1.022 | 0.011 | 1.036 | 0.016 | 1.039 | 0.020 | 1.042 | 0.027 | 9.440  | <0.001         | 0.127           | NC<aMCI, d-AD           |
| 13            | 1.024 | 0.011 | 1.041 | 0.023 | 1.041 | 0.024 | 1.047 | 0.035 | 7.343  | <0.001         | 0.102           | NC<d-AD                 |
| 14            | 1.028 | 0.014 | 1.046 | 0.027 | 1.041 | 0.029 | 1.011 | 0.201 | 1.001  | 0.394          | 0.015           | -                       |
| 15            | 1.030 | 0.015 | 1.051 | 0.033 | 1.050 | 0.029 | 1.191 | 1.925 | 0.199  | 0.897          | 0.003           | -                       |
| 16            | 1.034 | 0.021 | 1.035 | 0.172 | 0.994 | 0.259 | 0.818 | 0.460 | 5.046  | 0.002          | 0.072           | -                       |

<sup>a</sup> Values from ANCOVA with age and gender as covariates.

<sup>b</sup> Effect size; partial  $\eta^2$  for normalized rich club coefficient.

<sup>c</sup> Least significant difference; post hoc testing on normalized rich club coefficient based on means adjusted for age, gender.

aMCI: amnesic mild cognitive impairment; d-AD: dementia of Alzheimer's disease; NC: normal control; SCD: subjective cognitive decline.

Table S6. Post hoc testing on normalized rich club coefficient from ANCOVA with age and gender as covariates (Bonferroni-corrected for groups).

| k<br>(degree) | (I)<br>Group | (J)<br>Group | Mean<br>Difference<br>(I-J) | SE    | P                | 95% Confidence<br>Interval for Difference |                |
|---------------|--------------|--------------|-----------------------------|-------|------------------|-------------------------------------------|----------------|
|               |              |              |                             |       |                  | Lower<br>Bound                            | Upper<br>Bound |
| 1             | NC           | SCD          | 0.000                       | 0.000 | 1.000            | 0.000                                     | 0.000          |
|               |              | aMCI         | 0.000                       | 0.000 | 1.000            | 0.000                                     | 0.000          |
|               |              | d-AD         | 0.000                       | 0.000 | 1.000            | 0.000                                     | 0.000          |
|               | SCD          | NC           | 0.000                       | 0.000 | 1.000            | 0.000                                     | 0.000          |
|               |              | aMCI         | 0.000                       | 0.000 | 0.767            | 0.000                                     | 0.000          |
|               |              | d-AD         | 0.000                       | 0.000 | 1.000            | 0.000                                     | 0.000          |
|               | aMCI         | NC           | 0.000                       | 0.000 | 1.000            | 0.000                                     | 0.000          |
|               |              | SCD          | 0.000                       | 0.000 | 0.767            | 0.000                                     | 0.000          |
|               |              | d-AD         | 0.000                       | 0.000 | 1.000            | 0.000                                     | 0.000          |
|               | d-AD         | NC           | 0.000                       | 0.000 | 1.000            | 0.000                                     | 0.000          |
|               |              | SCD          | 0.000                       | 0.000 | 1.000            | 0.000                                     | 0.000          |
|               |              | aMCI         | 0.000                       | 0.000 | 1.000            | 0.000                                     | 0.000          |
| 2             | NC           | SCD          | 0.000                       | 0.000 | 0.420            | -0.001                                    | 0.000          |
|               |              | aMCI         | 0.000                       | 0.000 | 0.543            | -0.001                                    | 0.000          |
|               |              | d-AD         | -0.001                      | 0.000 | <b>0.010</b>     | -0.001                                    | 0.000          |
|               | SCD          | NC           | 0.000                       | 0.000 | 0.420            | 0.000                                     | 0.001          |
|               |              | aMCI         | 0.000                       | 0.000 | 1.000            | 0.000                                     | 0.001          |
|               |              | d-AD         | 0.000                       | 0.000 | 1.000            | -0.001                                    | 0.000          |
|               | aMCI         | NC           | 0.000                       | 0.000 | 0.543            | 0.000                                     | 0.001          |
|               |              | SCD          | 0.000                       | 0.000 | 1.000            | -0.001                                    | 0.000          |
|               |              | d-AD         | 0.000                       | 0.000 | 0.833            | -0.001                                    | 0.000          |
|               | d-AD         | NC           | 0.001                       | 0.000 | <b>0.010</b>     | 0.000                                     | 0.001          |
|               |              | SCD          | 0.000                       | 0.000 | 1.000            | 0.000                                     | 0.001          |
|               |              | aMCI         | 0.000                       | 0.000 | 0.833            | 0.000                                     | 0.001          |
| 3             | NC           | SCD          | -0.001                      | 0.000 | 0.094            | -0.002                                    | 0.000          |
|               |              | aMCI         | -0.001                      | 0.000 | 0.474            | -0.002                                    | 0.000          |
|               |              | d-AD         | -0.001                      | 0.000 | <b>&lt;0.001</b> | -0.002                                    | -0.001         |
|               | SCD          | NC           | 0.001                       | 0.000 | 0.094            | 0.000                                     | 0.002          |
|               |              | aMCI         | 0.000                       | 0.000 | 1.000            | -0.001                                    | 0.001          |
|               |              | d-AD         | -0.001                      | 0.000 | 0.760            | -0.002                                    | 0.000          |
|               | aMCI         | NC           | 0.001                       | 0.000 | 0.474            | 0.000                                     | 0.002          |
|               |              | SCD          | 0.000                       | 0.000 | 1.000            | -0.001                                    | 0.001          |
|               |              | d-AD         | -0.001                      | 0.000 | 0.099            | -0.002                                    | 0.000          |
|               | d-AD         | NC           | 0.001                       | 0.000 | <b>&lt;0.001</b> | 0.001                                     | 0.002          |
|               |              | SCD          | 0.001                       | 0.000 | 0.760            | 0.000                                     | 0.002          |
|               |              | aMCI         | 0.001                       | 0.000 | 0.099            | 0.000                                     | 0.002          |
| 4             | NC           | SCD          | -0.001                      | 0.001 | 0.259            | -0.003                                    | 0.000          |
|               |              | aMCI         | -0.002                      | 0.001 | <b>0.007</b>     | -0.003                                    | 0.000          |
|               |              | d-AD         | -0.004                      | 0.001 | <b>&lt;0.001</b> | -0.005                                    | -0.002         |

|   |      |      |        |       |                  |        |        |
|---|------|------|--------|-------|------------------|--------|--------|
|   |      | NC   | 0.001  | 0.001 | 0.259            | 0.000  | 0.003  |
|   | SCD  | aMCI | -0.001 | 0.001 | 1.000            | -0.002 | 0.001  |
|   |      | d-AD | -0.002 | 0.001 | <b>0.001</b>     | -0.004 | -0.001 |
|   |      | NC   | 0.002  | 0.001 | <b>0.007</b>     | 0.000  | 0.003  |
|   | aMCI | SCD  | 0.001  | 0.001 | 1.000            | -0.001 | 0.002  |
|   |      | d-AD | -0.002 | 0.001 | <b>0.013</b>     | -0.003 | 0.000  |
|   |      | NC   | 0.004  | 0.001 | <b>&lt;0.001</b> | 0.002  | 0.005  |
|   | d-AD | SCD  | 0.002  | 0.001 | <b>0.001</b>     | 0.001  | 0.004  |
|   |      | aMCI | 0.002  | 0.001 | <b>0.013</b>     | 0.000  | 0.003  |
|   |      | SCD  | -0.002 | 0.001 | 0.096            | -0.004 | 0.000  |
|   | NC   | aMCI | -0.003 | 0.001 | <b>&lt;0.001</b> | -0.005 | -0.001 |
|   |      | d-AD | -0.006 | 0.001 | <b>&lt;0.001</b> | -0.008 | -0.004 |
|   |      | NC   | 0.002  | 0.001 | 0.096            | 0.000  | 0.004  |
|   | SCD  | aMCI | -0.002 | 0.001 | 0.277            | -0.004 | 0.001  |
|   |      | d-AD | -0.004 | 0.001 | <b>&lt;0.001</b> | -0.006 | -0.002 |
| 5 |      | NC   | 0.003  | 0.001 | <b>&lt;0.001</b> | 0.001  | 0.005  |
|   | aMCI | SCD  | 0.002  | 0.001 | 0.277            | -0.001 | 0.004  |
|   |      | d-AD | -0.002 | 0.001 | <b>0.023</b>     | -0.004 | 0.000  |
|   |      | NC   | 0.006  | 0.001 | <b>&lt;0.001</b> | 0.004  | 0.008  |
|   | d-AD | SCD  | 0.004  | 0.001 | <b>&lt;0.001</b> | 0.002  | 0.006  |
|   |      | aMCI | 0.002  | 0.001 | <b>0.023</b>     | 0.000  | 0.004  |
|   |      | SCD  | -0.003 | 0.001 | 0.062            | -0.006 | 0.000  |
|   | NC   | aMCI | -0.006 | 0.001 | <b>&lt;0.001</b> | -0.009 | -0.003 |
|   |      | d-AD | -0.010 | 0.001 | <b>&lt;0.001</b> | -0.013 | -0.008 |
|   |      | NC   | 0.003  | 0.001 | 0.062            | 0.000  | 0.006  |
|   | SCD  | aMCI | -0.003 | 0.001 | 0.051            | -0.006 | 0.000  |
|   |      | d-AD | -0.007 | 0.001 | <b>&lt;0.001</b> | -0.011 | -0.004 |
| 6 |      | NC   | 0.006  | 0.001 | <b>&lt;0.001</b> | 0.003  | 0.009  |
|   | aMCI | SCD  | 0.003  | 0.001 | 0.051            | 0.000  | 0.006  |
|   |      | d-AD | -0.004 | 0.001 | <b>&lt;0.001</b> | -0.007 | -0.002 |
|   |      | NC   | 0.010  | 0.001 | <b>&lt;0.001</b> | 0.008  | 0.013  |
|   | d-AD | SCD  | 0.007  | 0.001 | <b>&lt;0.001</b> | 0.004  | 0.011  |
|   |      | aMCI | 0.004  | 0.001 | <b>&lt;0.001</b> | 0.002  | 0.007  |
|   |      | SCD  | -0.004 | 0.001 | <b>0.022</b>     | -0.008 | 0.000  |
|   | NC   | aMCI | -0.009 | 0.001 | <b>&lt;0.001</b> | -0.013 | -0.005 |
|   |      | d-AD | -0.014 | 0.001 | <b>&lt;0.001</b> | -0.017 | -0.010 |
|   |      | NC   | 0.004  | 0.001 | <b>0.022</b>     | 0.000  | 0.008  |
|   | SCD  | aMCI | -0.004 | 0.002 | <b>0.024</b>     | -0.009 | 0.000  |
|   |      | d-AD | -0.009 | 0.002 | <b>&lt;0.001</b> | -0.013 | -0.005 |
| 7 |      | NC   | 0.009  | 0.001 | <b>&lt;0.001</b> | 0.005  | 0.013  |
|   | aMCI | SCD  | 0.004  | 0.002 | <b>0.024</b>     | 0.000  | 0.009  |
|   |      | d-AD | -0.005 | 0.001 | <b>0.006</b>     | -0.009 | -0.001 |
|   |      | NC   | 0.014  | 0.001 | <b>&lt;0.001</b> | 0.010  | 0.017  |
|   | d-AD | SCD  | 0.009  | 0.002 | <b>&lt;0.001</b> | 0.005  | 0.013  |
|   |      | aMCI | 0.005  | 0.001 | <b>0.006</b>     | 0.001  | 0.009  |
| 8 |      | SCD  | -0.007 | 0.002 | <b>&lt;0.001</b> | -0.012 | -0.002 |
|   | NC   | aMCI | -0.012 | 0.002 | <b>&lt;0.001</b> | -0.017 | -0.007 |

|    |      |      |        |       |                  |        |        |
|----|------|------|--------|-------|------------------|--------|--------|
|    |      | d-AD | -0.018 | 0.002 | <b>&lt;0.001</b> | -0.022 | -0.013 |
|    | SCD  | NC   | 0.007  | 0.002 | <b>&lt;0.001</b> | 0.002  | 0.012  |
|    |      | aMCI | -0.005 | 0.002 | 0.075            | -0.010 | 0.000  |
|    |      | d-AD | -0.011 | 0.002 | <b>&lt;0.001</b> | -0.015 | -0.006 |
|    | aMCI | NC   | 0.012  | 0.002 | <b>&lt;0.001</b> | 0.007  | 0.017  |
|    |      | SCD  | 0.005  | 0.002 | 0.075            | 0.000  | 0.010  |
|    |      | d-AD | -0.006 | 0.002 | <b>0.006</b>     | -0.010 | -0.001 |
|    | d-AD | NC   | 0.018  | 0.002 | <b>&lt;0.001</b> | 0.013  | 0.022  |
|    |      | SCD  | 0.011  | 0.002 | <b>&lt;0.001</b> | 0.006  | 0.015  |
|    |      | aMCI | 0.006  | 0.002 | <b>0.006</b>     | 0.001  | 0.010  |
| 9  | NC   | SCD  | -0.011 | 0.002 | <b>&lt;0.001</b> | -0.017 | -0.005 |
|    |      | aMCI | -0.014 | 0.002 | <b>&lt;0.001</b> | -0.020 | -0.009 |
|    |      | d-AD | -0.020 | 0.002 | <b>&lt;0.001</b> | -0.026 | -0.015 |
|    | SCD  | NC   | 0.011  | 0.002 | <b>&lt;0.001</b> | 0.005  | 0.017  |
|    |      | aMCI | -0.003 | 0.002 | 0.837            | -0.010 | 0.003  |
|    |      | d-AD | -0.009 | 0.002 | <b>&lt;0.001</b> | -0.016 | -0.003 |
|    | aMCI | NC   | 0.014  | 0.002 | <b>&lt;0.001</b> | 0.009  | 0.020  |
|    |      | SCD  | 0.003  | 0.002 | 0.837            | -0.003 | 0.010  |
|    |      | d-AD | -0.006 | 0.002 | 0.031            | -0.012 | 0.000  |
|    | d-AD | NC   | 0.020  | 0.002 | <b>&lt;0.001</b> | 0.015  | 0.026  |
|    |      | SCD  | 0.009  | 0.002 | <b>&lt;0.001</b> | 0.003  | 0.016  |
|    |      | aMCI | 0.006  | 0.002 | 0.031            | 0.000  | 0.012  |
| 10 | NC   | SCD  | -0.012 | 0.003 | <b>&lt;0.001</b> | -0.019 | -0.005 |
|    |      | aMCI | -0.016 | 0.002 | <b>&lt;0.001</b> | -0.022 | -0.009 |
|    |      | d-AD | -0.021 | 0.002 | <b>&lt;0.001</b> | -0.028 | -0.015 |
|    | SCD  | NC   | 0.012  | 0.003 | <b>&lt;0.001</b> | 0.005  | 0.019  |
|    |      | aMCI | -0.004 | 0.003 | 0.786            | -0.011 | 0.003  |
|    |      | d-AD | -0.009 | 0.003 | 0.002            | -0.016 | -0.002 |
|    | aMCI | NC   | 0.016  | 0.002 | <b>&lt;0.001</b> | 0.009  | 0.022  |
|    |      | SCD  | 0.004  | 0.003 | 0.786            | -0.003 | 0.011  |
|    |      | d-AD | -0.005 | 0.002 | 0.160            | -0.012 | 0.001  |
|    | d-AD | NC   | 0.021  | 0.002 | <b>&lt;0.001</b> | 0.015  | 0.028  |
|    |      | SCD  | 0.009  | 0.003 | <b>0.002</b>     | 0.002  | 0.016  |
|    |      | aMCI | 0.005  | 0.002 | 0.160            | -0.001 | 0.012  |
| 11 | NC   | SCD  | -0.014 | 0.003 | <b>&lt;0.001</b> | -0.021 | -0.006 |
|    |      | aMCI | -0.016 | 0.003 | <b>&lt;0.001</b> | -0.024 | -0.009 |
|    |      | d-AD | -0.021 | 0.003 | <b>&lt;0.001</b> | -0.028 | -0.013 |
|    | SCD  | NC   | 0.014  | 0.003 | <b>&lt;0.001</b> | 0.006  | 0.021  |
|    |      | aMCI | -0.003 | 0.003 | 1.000            | -0.011 | 0.005  |
|    |      | d-AD | -0.007 | 0.003 | 0.096            | -0.015 | 0.001  |
|    | aMCI | NC   | 0.016  | 0.003 | <b>&lt;0.001</b> | 0.009  | 0.024  |
|    |      | SCD  | 0.003  | 0.003 | 1.000            | -0.005 | 0.011  |
|    |      | d-AD | -0.005 | 0.003 | 0.591            | -0.012 | 0.003  |
|    | d-AD | NC   | 0.021  | 0.003 | <b>&lt;0.001</b> | 0.013  | 0.028  |
|    |      | SCD  | 0.007  | 0.003 | 0.096            | -0.001 | 0.015  |
|    |      | aMCI | 0.005  | 0.003 | 0.591            | -0.003 | 0.012  |
|    |      | SCD  | -0.014 | 0.004 | <b>0.005</b>     | -0.024 | -0.003 |

|      |      |      |        |        |                  |              |        |
|------|------|------|--------|--------|------------------|--------------|--------|
| 12   | NC   | aMCI | -0.016 | 0.004  | <b>&lt;0.001</b> | -0.027       | -0.006 |
|      |      | d-AD | -0.018 | 0.004  | <b>&lt;0.001</b> | -0.029       | -0.008 |
|      | SCD  | NC   | 0.014  | 0.004  | <b>0.005</b>     | 0.003        | 0.024  |
|      |      | aMCI | -0.003 | 0.004  | 1.000            | -0.014       | 0.008  |
|      |      | d-AD | -0.005 | 0.004  | 1.000            | -0.016       | 0.006  |
|      | aMCI | NC   | 0.016  | 0.004  | <b>&lt;0.001</b> | 0.006        | 0.027  |
|      |      | SCD  | 0.003  | 0.004  | 1.000            | -0.008       | 0.014  |
|      |      | d-AD | -0.002 | 0.004  | 1.000            | -0.012       | 0.008  |
|      | d-AD | NC   | 0.018  | 0.004  | <b>&lt;0.001</b> | 0.008        | 0.029  |
|      |      | SCD  | 0.005  | 0.004  | 1.000            | -0.006       | 0.016  |
|      |      | aMCI | 0.002  | 0.004  | 1.000            | -0.008       | 0.012  |
|      | 13   | NC   | SCD    | -0.017 | 0.005            | <b>0.006</b> | -0.031 |
| aMCI |      |      | -0.017 | 0.005  | <b>0.005</b>     | -0.030       | -0.004 |
| d-AD |      |      | -0.021 | 0.005  | <b>&lt;0.001</b> | -0.034       | -0.008 |
| SCD  |      | NC   | 0.017  | 0.005  | 0.006            | 0.004        | 0.031  |
|      |      | aMCI | 0.001  | 0.005  | 1.000            | -0.014       | 0.015  |
|      |      | d-AD | -0.004 | 0.005  | 1.000            | -0.018       | 0.010  |
| aMCI |      | NC   | 0.017  | 0.005  | <b>0.005</b>     | 0.004        | 0.030  |
|      |      | SCD  | -0.001 | 0.005  | 1.000            | -0.015       | 0.014  |
|      |      | d-AD | -0.004 | 0.005  | 1.000            | -0.018       | 0.009  |
| d-AD |      | NC   | 0.021  | 0.005  | <b>&lt;0.001</b> | 0.008        | 0.034  |
|      |      | SCD  | 0.004  | 0.005  | 1.000            | -0.010       | 0.018  |
|      |      | aMCI | 0.004  | 0.005  | 1.000            | -0.009       | 0.018  |
| 14   | NC   | SCD  | -0.020 | 0.022  | 1.000            | -0.079       | 0.040  |
|      |      | aMCI | -0.017 | 0.021  | 1.000            | -0.074       | 0.040  |
|      |      | d-AD | 0.013  | 0.021  | 1.000            | -0.044       | 0.071  |
|      | SCD  | NC   | 0.020  | 0.022  | 1.000            | -0.040       | 0.079  |
|      |      | aMCI | 0.003  | 0.023  | 1.000            | -0.059       | 0.064  |
|      |      | d-AD | 0.033  | 0.023  | 0.895            | -0.028       | 0.094  |
|      | aMCI | NC   | 0.017  | 0.021  | 1.000            | -0.040       | 0.074  |
|      |      | SCD  | -0.003 | 0.023  | 1.000            | -0.064       | 0.059  |
|      |      | d-AD | 0.031  | 0.021  | 0.934            | -0.027       | 0.088  |
|      | d-AD | NC   | -0.013 | 0.021  | 1.000            | -0.071       | 0.044  |
|      |      | SCD  | -0.033 | 0.023  | 0.895            | -0.094       | 0.028  |
|      |      | aMCI | -0.031 | 0.021  | 0.934            | -0.088       | 0.027  |
| 15   | NC   | SCD  | 0.007  | 0.210  | 1.000            | -0.553       | 0.566  |
|      |      | aMCI | 0.036  | 0.201  | 1.000            | -0.500       | 0.572  |
|      |      | d-AD | -0.109 | 0.200  | 1.000            | -0.643       | 0.425  |
|      | SCD  | NC   | -0.007 | 0.210  | 1.000            | -0.566       | 0.553  |
|      |      | aMCI | 0.029  | 0.216  | 1.000            | -0.546       | 0.605  |
|      |      | d-AD | -0.116 | 0.214  | 1.000            | -0.687       | 0.455  |
|      | aMCI | NC   | -0.036 | 0.201  | 1.000            | -0.572       | 0.500  |
|      |      | SCD  | -0.029 | 0.216  | 1.000            | -0.605       | 0.546  |
|      |      | d-AD | -0.145 | 0.201  | 1.000            | -0.680       | 0.390  |
|      | d-AD | NC   | 0.109  | 0.200  | 1.000            | -0.425       | 0.643  |
|      |      | SCD  | 0.116  | 0.214  | 1.000            | -0.455       | 0.687  |
|      |      | aMCI | 0.145  | 0.201  | 1.000            | -0.390       | 0.680  |

---

|    |      |      |        |       |              |        |        |
|----|------|------|--------|-------|--------------|--------|--------|
|    |      | SCD  | -0.011 | 0.059 | 1.000        | -0.167 | 0.146  |
|    | NC   | aMCI | 0.020  | 0.056 | 1.000        | -0.131 | 0.170  |
|    |      | d-AD | 0.183  | 0.056 | <b>0.008</b> | 0.034  | 0.333  |
|    |      | NC   | 0.011  | 0.059 | 1.000        | -0.146 | 0.167  |
|    | SCD  | aMCI | 0.030  | 0.060 | 1.000        | -0.131 | 0.192  |
|    |      | d-AD | 0.194  | 0.060 | <b>0.009</b> | 0.034  | 0.354  |
| 16 |      | NC   | -0.020 | 0.056 | 1.000        | -0.170 | 0.131  |
|    | aMCI | SCD  | -0.030 | 0.060 | 1.000        | -0.192 | 0.131  |
|    |      | d-AD | 0.164  | 0.056 | <b>0.024</b> | 0.014  | 0.313  |
|    |      | NC   | -0.183 | 0.056 | <b>0.008</b> | -0.333 | -0.034 |
|    | d-AD | SCD  | -0.194 | 0.060 | <b>0.009</b> | -0.354 | -0.034 |
|    |      | aMCI | -0.164 | 0.056 | <b>0.024</b> | -0.313 | -0.014 |

---

Table S7. Post hoc testing on rich club, feeder, local connectivity strength from ANCOVA with age and gender as covariates (Bonferroni-corrected for groups).

| ANCOVA<br>COV: Age &<br>Gender        | (I) Group | (J) Group | Mean<br>Difference<br>(I-J) | SE    | P              | 95% Confidence<br>Interval for Difference <sup>b</sup> |         |
|---------------------------------------|-----------|-----------|-----------------------------|-------|----------------|--------------------------------------------------------|---------|
|                                       |           |           |                             |       |                | Lower                                                  | Upper   |
|                                       |           |           |                             |       |                | Bound                                                  | Bound   |
| Rich Club<br>Connectivity<br>Strength | NC        | SCD       | 0.660                       | 0.375 | 0.481          | -0.339                                                 | 1.659   |
|                                       |           | aMCI      | 1.570                       | 0.355 | < <b>0.001</b> | 0.628                                                  | 2.521   |
|                                       |           | AD        | 2.215                       | 0.373 | < <b>0.001</b> | 1.221                                                  | 3.209   |
|                                       | SCD       | NC        | -0.660                      | 0.375 | 0.481          | -1.659                                                 | 0.339   |
|                                       |           | aMCI      | 0.914                       | 0.377 | 0.097          | -0.091                                                 | 1.919   |
|                                       |           | AD        | 1.555                       | 0.392 | <b>0.001</b>   | 0.511                                                  | 2.600   |
|                                       | aMCI      | NC        | -1.574                      | 0.355 | < <b>0.001</b> | -2.521                                                 | -0.628  |
|                                       |           | SCD       | -0.914                      | 0.377 | 0.097          | -1.919                                                 | 0.091   |
|                                       |           | AD        | 0.641                       | 0.366 | 0.487          | -0.333                                                 | 1.614   |
|                                       | d-AD      | NC        | -2.215                      | 0.373 | < <b>0.001</b> | -3.209                                                 | -1.221  |
|                                       |           | SCD       | -1.555                      | 0.392 | <b>0.001</b>   | -2.600                                                 | -0.511  |
|                                       |           | aMCI      | -0.641                      | 0.366 | 0.487          | -1.614                                                 | 0.333   |
| Feeder<br>Connectivity<br>Strength    | NC        | SCD       | 9.500                       | 1.415 | < <b>0.001</b> | 5.733                                                  | 13.267  |
|                                       |           | aMCI      | 12.889                      | 1.340 | < <b>0.001</b> | 9.320                                                  | 16.457  |
|                                       |           | AD        | 19.608                      | 1.408 | < <b>0.001</b> | 15.859                                                 | 23.357  |
|                                       | SCD       | NC        | -9.500                      | 1.415 | < <b>0.001</b> | -13.267                                                | -5.733  |
|                                       |           | aMCI      | 3.389                       | 1.423 | 0.109          | -0.400                                                 | 7.178   |
|                                       |           | AD        | 10.108                      | 1.479 | < <b>0.001</b> | 6.169                                                  | 14.046  |
|                                       | aMCI      | NC        | -12.889                     | 1.340 | < <b>0.001</b> | -16.457                                                | -9.320  |
|                                       |           | SCD       | -3.389                      | 1.423 | 0.109          | -7.178                                                 | 0.400   |
|                                       |           | AD        | 6.719                       | 1.379 | < <b>0.001</b> | 3.049                                                  | 10.390  |
|                                       | d-AD      | NC        | -19.608                     | 1.408 | < <b>0.001</b> | -23.357                                                | -15.859 |
|                                       |           | SCD       | -10.108                     | 1.479 | < <b>0.001</b> | -14.046                                                | -6.169  |
|                                       |           | aMCI      | -6.719                      | 1.379 | < <b>0.001</b> | -10.390                                                | -3.049  |
| Local<br>Connectivity<br>Strength     | NC        | SCD       | 21.542                      | 2.232 | < <b>0.001</b> | 15.600                                                 | 27.485  |
|                                       |           | aMCI      | 27.603                      | 2.114 | < <b>0.001</b> | 21.974                                                 | 33.232  |
|                                       |           | AD        | 40.150                      | 2.221 | < <b>0.001</b> | 34.236                                                 | 46.063  |
|                                       | SCD       | NC        | -21.542                     | 2.232 | < <b>0.001</b> | -27.485                                                | -15.600 |
|                                       |           | aMCI      | 6.061                       | 2.245 | <b>0.045</b>   | 0.084                                                  | 12.038  |
|                                       |           | AD        | 18.607                      | 2.333 | < <b>0.001</b> | 12.394                                                 | 24.820  |
|                                       | aMCI      | NC        | -27.603                     | 2.114 | < <b>0.001</b> | -33.232                                                | -21.974 |
|                                       |           | SCD       | -6.061                      | 2.245 | <b>0.045</b>   | -12.038                                                | -0.084  |
|                                       |           | AD        | 12.546                      | 2.175 | < <b>0.001</b> | 6.756                                                  | 18.337  |
|                                       | d-AD      | NC        | -40.150                     | 2.221 | < <b>0.001</b> | -46.063                                                | -34.236 |
|                                       |           | SCD       | -18.607                     | 2.333 | < <b>0.001</b> | -24.820                                                | -12.394 |
|                                       |           | aMCI      | -12.546                     | 2.175 | < <b>0.001</b> | -18.337                                                | -6.756  |



Table S8. Post hoc testing on network topological metrics from ANCOVA with age and gender as covariates (Bonferroni-corrected for groups).

| Network Topological Metrics       | (I) Group | (J) Group | Mean Difference (I-J) | SE    | P      | 95% Confidence Interval for Difference |             |
|-----------------------------------|-----------|-----------|-----------------------|-------|--------|----------------------------------------|-------------|
|                                   |           |           |                       |       |        | Lower Bound                            | Upper Bound |
| Strength                          | NC        | SCD       | 0.704                 | 0.079 | <0.001 | 0.494                                  | 0.915       |
|                                   |           | aMCI      | 0.935                 | 0.075 | <0.001 | 0.736                                  | 1.134       |
|                                   |           | d-AD      | 1.377                 | 0.079 | <0.001 | 1.168                                  | 1.586       |
|                                   | SCD       | NC        | -0.704                | 0.079 | <0.001 | -0.915                                 | -0.494      |
|                                   |           | aMCI      | 0.230                 | 0.079 | 0.024  | 0.019                                  | 0.442       |
|                                   |           | d-AD      | 0.673                 | 0.082 | <0.001 | 0.453                                  | 0.892       |
|                                   | aMCI      | NC        | -0.935                | 0.075 | <0.001 | -1.134                                 | -0.736      |
|                                   |           | SCD       | -0.230                | 0.079 | 0.024  | -0.442                                 | -0.019      |
|                                   |           | d-AD      | 0.442                 | 0.077 | <0.001 | 0.238                                  | 0.647       |
|                                   | d-AD      | NC        | -1.377                | 0.079 | <0.001 | -1.586                                 | -1.168      |
|                                   |           | SCD       | -0.673                | 0.082 | <0.001 | -0.892                                 | -0.453      |
|                                   |           | aMCI      | -0.442                | 0.077 | <0.001 | -0.647                                 | -0.238      |
| Clustering Coefficient            | NC        | SCD       | 0.015                 | 0.004 | 0.003  | 0.004                                  | 0.026       |
|                                   |           | aMCI      | 0.019                 | 0.004 | <0.001 | 0.008                                  | 0.029       |
|                                   |           | d-AD      | 0.026                 | 0.004 | <0.001 | 0.015                                  | 0.037       |
|                                   | SCD       | NC        | -0.015                | 0.004 | 0.003  | -0.026                                 | -0.004      |
|                                   |           | aMCI      | 0.003                 | 0.004 | 1.000  | -0.008                                 | 0.015       |
|                                   |           | d-AD      | 0.011                 | 0.004 | 0.101  | -0.001                                 | 0.022       |
|                                   | aMCI      | NC        | -0.019                | 0.004 | <0.001 | -0.029                                 | -0.008      |
|                                   |           | SCD       | -0.003                | 0.004 | 1.000  | -0.015                                 | 0.008       |
|                                   |           | d-AD      | 0.007                 | 0.004 | 0.486  | -0.004                                 | 0.018       |
|                                   | d-AD      | NC        | -0.026                | 0.004 | <0.001 | -0.037                                 | -0.015      |
|                                   |           | SCD       | -0.011                | 0.004 | 0.101  | -0.022                                 | 0.001       |
|                                   |           | aMCI      | -0.007                | 0.004 | 0.486  | -0.018                                 | 0.004       |
| Normalized Clustering Coefficient | NC        | SCD       | -0.158                | 0.031 | <0.001 | -0.240                                 | -0.076      |
|                                   |           | aMCI      | -0.145                | 0.029 | <0.001 | -0.223                                 | -0.068      |
|                                   |           | d-AD      | -0.340                | 0.031 | <0.001 | -0.422                                 | -0.259      |
|                                   | SCD       | NC        | 0.158                 | 0.031 | <0.001 | 0.076                                  | 0.240       |
|                                   |           | aMCI      | 0.013                 | 0.031 | 1.000  | -0.070                                 | 0.095       |
|                                   |           | d-AD      | -0.182                | 0.032 | <0.001 | -0.268                                 | -0.097      |
|                                   | aMCI      | NC        | 0.145                 | 0.029 | <0.001 | 0.068                                  | 0.223       |
|                                   |           | SCD       | -0.013                | 0.031 | 1.000  | -0.095                                 | 0.070       |
|                                   |           | d-AD      | -0.195                | 0.030 | <0.001 | -0.275                                 | -0.115      |
|                                   | d-AD      | NC        | 0.340                 | 0.031 | <0.001 | 0.259                                  | 0.422       |
|                                   |           | SCD       | 0.182                 | 0.032 | <0.001 | 0.097                                  | 0.268       |
|                                   |           | aMCI      | 0.195                 | 0.030 | <0.001 | 0.115                                  | 0.275       |
| Characteristic Path Length        | NC        | SCD       | -0.348                | 0.065 | <0.001 | -0.521                                 | -0.176      |
|                                   |           | aMCI      | -0.468                | 0.061 | <0.001 | -0.631                                 | -0.305      |
|                                   |           | d-AD      | -0.760                | 0.064 | <0.001 | -0.931                                 | -0.588      |

|                                             |      |      |        |       |                  |        |        |
|---------------------------------------------|------|------|--------|-------|------------------|--------|--------|
|                                             |      | NC   | 0.348  | 0.065 | <b>&lt;0.001</b> | 0.176  | 0.521  |
|                                             | SCD  | aMCI | -0.119 | 0.065 | 0.408            | -0.293 | 0.054  |
|                                             |      | d-AD | -0.411 | 0.068 | <b>&lt;0.001</b> | -0.591 | -0.231 |
|                                             | aMCI | NC   | 0.468  | 0.061 | <b>&lt;0.001</b> | 0.305  | 0.631  |
|                                             |      | SCD  | 0.119  | 0.065 | 0.408            | -0.054 | 0.293  |
|                                             |      | d-AD | -0.292 | 0.063 | <b>&lt;0.001</b> | -0.460 | -0.124 |
|                                             | d-AD | NC   | 0.760  | 0.064 | <b>&lt;0.001</b> | 0.588  | 0.931  |
|                                             |      | SCD  | 0.411  | 0.068 | <b>&lt;0.001</b> | 0.231  | 0.591  |
|                                             |      | aMCI | 0.292  | 0.063 | <b>&lt;0.001</b> | 0.124  | 0.460  |
| Normalized<br>Characteristic<br>Path length | NC   | SCD  | -0.005 | 0.002 | 0.135            | -0.011 | 0.001  |
|                                             |      | aMCI | 0.000  | 0.002 | 1.000            | -0.006 | 0.005  |
|                                             |      | d-AD | -0.007 | 0.002 | <b>0.015</b>     | -0.013 | -0.001 |
|                                             | SCD  | NC   | 0.005  | 0.002 | 0.135            | -0.001 | 0.011  |
|                                             |      | aMCI | 0.005  | 0.002 | 0.212            | -0.001 | 0.011  |
|                                             |      | d-AD | -0.002 | 0.002 | 1.000            | -0.008 | 0.004  |
|                                             | aMCI | NC   | 0.000  | 0.002 | 1.000            | -0.005 | 0.006  |
|                                             |      | SCD  | -0.005 | 0.002 | 0.212            | -0.011 | 0.001  |
|                                             |      | d-AD | -0.006 | 0.002 | <b>0.021</b>     | -0.012 | -0.001 |
|                                             | d-AD | NC   | 0.007  | 0.002 | <b>0.015</b>     | 0.001  | 0.013  |
|                                             |      | SCD  | 0.002  | 0.002 | 1.000            | -0.004 | 0.008  |
|                                             |      | aMCI | 0.006  | 0.002 | <b>0.021</b>     | 0.001  | 0.012  |

Table S9. Whole-brain structural connectivity of nodes with the highest number of aberrant connections in patient groups compared with NC. Nodes with the highest number of aberrant connections in each patient groups (range = 11 to 27 aberrant connections), based on two-sample t-test (NC versus each patient groups) with FDR corrected to the P values to correct for multiple comparisons across all edges. Significance was set at  $P < 0.05$ . The bold nodes represent the rich club nodes in all groups.

| Region        | MNI    |        |        | Number of Connections |             |             |
|---------------|--------|--------|--------|-----------------------|-------------|-------------|
|               | x      | y      | z      | SCD vs. NC            | aMCI vs. NC | d-AD vs. NC |
| CAU.L         | -11.46 | 11     | 9.24   | 15                    | 15          | 22          |
| <b>CAU.R</b>  | 14.84  | 12.07  | 9.42   | 12                    | 14          | 20          |
| ORBmid.L      | -30.65 | 50.43  | -9.62  | 11                    | 9           | 7           |
| <b>PCUN.L</b> | -7.24  | -56.07 | 48.01  |                       | 19          | 27          |
| SFGdor.R      | 21.9   | 31.12  | 43.82  |                       | 17          | 17          |
| MOG.L         | -32.39 | -80.73 | 16.11  |                       | 16          | 18          |
| <b>PCUN.R</b> | 9.98   | -56.05 | 43.77  |                       | 15          | 26          |
| <b>THA.L</b>  | -10.85 | -17.56 | 7.98   |                       | 15          | 20          |
| SPG.R         | 26.11  | -59.18 | 62.06  |                       | 15          | 17          |
| HIP.L         | -25.03 | -20.74 | -10.13 |                       | 15          | 16          |
| <b>HIP.R</b>  | 29.23  | -19.78 | -10.33 |                       | 15          | 13          |
| SPG.L         | -23.45 | -59.56 | 58.96  |                       | 14          | 22          |
| DCG.L         | -5.48  | -14.92 | 41.57  |                       | 14          | 17          |
| ORBsup.L      | -16.56 | 47.32  | -13.31 |                       | 14          | 15          |
| OLF.L         | -8.06  | 15.05  | -11.46 |                       | 13          | 13          |
| <b>CAL.L</b>  | -7.14  | -78.67 | 6.44   |                       | 13          | 13          |
| ACG.R         | 8.46   | 37.01  | 15.84  |                       | 13          | 12          |
| <b>PUT.R</b>  | 27.78  | 4.91   | 2.46   |                       | 12          | 17          |
| ACG.L         | -4.04  | 35.4   | 13.95  |                       | 12          | 15          |
| <b>PUT.L</b>  | -23.91 | 3.86   | 2.4    |                       | 12          | 15          |
| SOG.L         | -16.54 | -84.26 | 28.17  |                       | 12          | 14          |
| ORBmid.R      | 33.18  | 52.59  | -10.73 |                       | 12          | 12          |
| <b>CUN.L</b>  | -5.93  | -80.13 | 27.22  |                       | 12          |             |
| PHG.R         | 25.38  | -15.15 | -20.47 |                       | 11          | 17          |
| IFGtriang.R   | 50.33  | 30.16  | 14.17  |                       | 11          | 16          |
| INS.L         | -35.13 | 6.65   | 3.44   |                       | 11          | 14          |
| PCG.L         | -4.85  | -42.92 | 24.67  |                       | 11          | 14          |
| SMA.R         | 8.62   | 0.17   | 61.85  |                       | 11          | 13          |
| TPOsup.R      | 48.25  | 14.75  | -16.86 |                       | 11          | 13          |
| LING.R        | 16.29  | -66.93 | -3.87  |                       | 11          | 12          |
| THA.R         | 13     | -17.55 | 8.09   |                       |             | 20          |
| IFGtriang.L   | -45.58 | 29.91  | 13.99  |                       |             | 17          |
| MFG.R         | 37.59  | 33.06  | 34.04  |                       |             | 14          |
| DCG.R         | 8.02   | -8.83  | 39.79  |                       |             | 14          |

---

|              |        |        |        |    |
|--------------|--------|--------|--------|----|
| ORBinf.R     | 41.22  | 32.23  | -11.91 | 13 |
| SMA.L        | -5.32  | 4.85   | 61.38  | 13 |
| SFGmed.R     | 9.1    | 50.84  | 30.22  | 13 |
| INS.R        | 39.02  | 6.25   | 2.08   | 13 |
| <b>CUN.R</b> | 13.51  | -79.36 | 28.23  | 13 |
| ITG.L        | -49.77 | -28.05 | -23.17 | 13 |
| ITG.R        | 53.69  | -31.07 | -22.32 | 13 |
| MFG.L        | -33.43 | 32.73  | 35.46  | 12 |
| ORBinf.L     | -35.98 | 30.71  | -12.11 | 12 |
| SFGmed.L     | -4.8   | 49.17  | 30.89  | 12 |
| LING.L       | -14.62 | -67.56 | -4.63  | 12 |
| SOG.R        | 24.29  | -80.85 | 30.59  | 12 |
| SFGdor.L     | -18.45 | 34.81  | 42.2   | 11 |
| PoCG.R       | 41.43  | -25.49 | 52.55  | 11 |
| PCL.L        | -7.63  | -25.36 | 70.07  | 11 |

---

Table S10. Post hoc testing on nodal efficiency from ANCOVA with age and gender as covariates (Bonferroni-corrected for groups).

| COV:<br>Age &<br>Gender | (I) Group | (J) Group | Mean<br>Difference<br>(I-J) | SE    | P                | 95% Confidence Interval<br>for Difference |                |
|-------------------------|-----------|-----------|-----------------------------|-------|------------------|-------------------------------------------|----------------|
|                         |           |           |                             |       |                  | Lower<br>Bound                            | Upper<br>Bound |
|                         |           |           |                             |       |                  |                                           |                |
| CAU.L<br>Efficiency     | NC        | SCD       | 0.021                       | 0.006 | <b>0.005</b>     | 0.005                                     | 0.037          |
|                         |           | aMCI      | 0.016                       | 0.006 | <b>0.031</b>     | 0.001                                     | 0.032          |
|                         |           | AD        | 0.021                       | 0.006 | <b>0.004</b>     | 0.005                                     | 0.038          |
|                         | SCD       | NC        | -0.021                      | 0.006 | <b>0.005</b>     | -0.037                                    | -0.005         |
|                         |           | aMCI      | -0.005                      | 0.006 | 1.000            | -0.021                                    | 0.012          |
|                         |           | AD        | 0.000                       | 0.006 | 1.000            | -0.017                                    | 0.017          |
|                         | aMCI      | NC        | -0.016                      | 0.006 | <b>0.031</b>     | -0.032                                    | -0.001         |
|                         |           | SCD       | 0.005                       | 0.006 | 1.000            | -0.012                                    | 0.021          |
|                         |           | AD        | 0.005                       | 0.006 | 1.000            | -0.011                                    | 0.021          |
|                         | d-AD      | NC        | -0.021                      | 0.006 | <b>0.004</b>     | -0.038                                    | -0.005         |
|                         |           | SCD       | 0.000                       | 0.006 | 1.000            | -0.017                                    | 0.017          |
|                         |           | aMCI      | -0.005                      | 0.006 | 1.000            | -0.021                                    | 0.011          |
| CAU.R<br>Efficiency     | NC        | SCD       | 0.014                       | 0.006 | 0.071            | -0.001                                    | 0.029          |
|                         |           | aMCI      | 0.014                       | 0.005 | <b>0.044</b>     | 0.000                                     | 0.028          |
|                         |           | AD        | 0.023                       | 0.006 | <b>&lt;0.001</b> | 0.008                                     | 0.038          |
|                         | SCD       | NC        | -0.014                      | 0.006 | 0.071            | -0.029                                    | 0.001          |
|                         |           | aMCI      | 0.000                       | 0.006 | 1.000            | -0.015                                    | 0.015          |
|                         |           | AD        | 0.009                       | 0.006 | 0.788            | -0.007                                    | 0.024          |
|                         | aMCI      | NC        | -0.014                      | 0.005 | <b>0.044</b>     | -0.028                                    | 0.000          |
|                         |           | SCD       | 0.000                       | 0.006 | 1.000            | -0.015                                    | 0.015          |
|                         |           | AD        | 0.009                       | 0.005 | 0.662            | -0.006                                    | 0.023          |
|                         | d-AD      | NC        | -0.023                      | 0.006 | <b>&lt;0.001</b> | -0.038                                    | -0.008         |
|                         |           | SCD       | -0.009                      | 0.006 | 0.788            | -0.024                                    | 0.007          |
|                         |           | aMCI      | -0.009                      | 0.005 | 0.662            | -0.023                                    | 0.006          |
| ORBmid.L<br>Efficiency  | NC        | SCD       | 0.092                       | 0.020 | <b>&lt;0.001</b> | 0.040                                     | 0.145          |
|                         |           | aMCI      | 0.095                       | 0.019 | <b>&lt;0.001</b> | 0.045                                     | 0.145          |
|                         |           | AD        | 0.097                       | 0.020 | <b>&lt;0.001</b> | 0.045                                     | 0.149          |
|                         | SCD       | NC        | -0.092                      | 0.020 | <b>&lt;0.001</b> | -0.145                                    | -0.040         |
|                         |           | aMCI      | 0.003                       | 0.020 | 1.000            | -0.050                                    | 0.055          |
|                         |           | AD        | 0.005                       | 0.021 | 1.000            | -0.050                                    | 0.059          |
|                         | aMCI      | NC        | -0.095                      | 0.019 | <b>&lt;0.001</b> | -0.145                                    | -0.045         |
|                         |           | SCD       | -0.003                      | 0.020 | 1.000            | -0.055                                    | 0.050          |
|                         |           | AD        | 0.002                       | 0.019 | 1.000            | -0.049                                    | 0.053          |
|                         | d-AD      | NC        | -0.097                      | 0.020 | <b>&lt;0.001</b> | -0.149                                    | -0.045         |
|                         |           | SCD       | -0.005                      | 0.021 | 1.000            | -0.059                                    | 0.050          |
|                         |           | aMCI      | -0.002                      | 0.019 | 1.000            | -0.053                                    | 0.049          |

Table S11. Partial Pearson’s correlations between rich club, feeder and local connectivity strength and clinical performance. Partial Pearson’s correlations controlled for age, gender, and education were used to assess how rich club, feeder and local connectivity related to clinical performance in each group. The bold numbers represent significant correlations at  $P<0.05$  without Bonferroni corrections. The star-labeled numbers represent significant correlations at  $P<0.05$  after Bonferroni corrections for the number of cognitive test variables (AVLT-immediate recall, AVLT-delayed recall, AVLT-recognition, MMSE and MoCA).

| COV: Age & Gender & Education |                              |                              | Rich Club             | Feeder                | Local                 |       |
|-------------------------------|------------------------------|------------------------------|-----------------------|-----------------------|-----------------------|-------|
|                               |                              |                              | Connectivity Strength | Connectivity Strength | Connectivity Strength |       |
| NC<br>DF=49                   | AVLT-Immediate Recall Scores | r                            | 0.119                 | 0.192                 | 0.001                 |       |
|                               |                              | p                            | 0.202                 | 0.089                 | 0.496                 |       |
|                               | AVLT-Delayed Recall Scores   | r                            | -0.150                | 0.099                 | -0.012                |       |
|                               |                              | p                            | 0.146                 | 0.245                 | 0.467                 |       |
|                               | AVLT-Recognition Scores      | r                            | -0.153                | 0.209                 | 0.112                 |       |
|                               |                              | p                            | 0.141                 | 0.070                 | 0.218                 |       |
|                               | MMSE                         | r                            | 0.085                 | 0.157                 | 0.120                 |       |
|                               |                              | p                            | 0.278                 | 0.135                 | 0.201                 |       |
|                               | MoCA                         | r                            | -0.095                | 0.231                 | 0.181                 |       |
|                               |                              | p                            | 0.253                 | 0.051                 | 0.102                 |       |
|                               | SCD<br>DF=39                 | AVLT-Immediate Recall Scores | r                     | 0.047                 | 0.234                 | 0.087 |
|                               |                              |                              | p                     | 0.386                 | 0.070                 | 0.294 |
| AVLT-Delayed Recall Scores    |                              | r                            | 0.223                 | 0.362                 | 0.214                 |       |
|                               |                              | p                            | 0.080                 | <b>0.010*</b>         | 0.090                 |       |
| AVLT-Recognition Scores       |                              | r                            | -0.027                | 0.162                 | -0.068                |       |
|                               |                              | p                            | 0.433                 | 0.156                 | 0.336                 |       |
| MMSE                          |                              | r                            | -0.018                | 0.064                 | -0.039                |       |
|                               |                              | p                            | 0.456                 | 0.346                 | 0.405                 |       |
| MoCA                          |                              | r                            | 0.152                 | 0.061                 | 0.006                 |       |
|                               |                              | p                            | 0.171                 | 0.353                 | 0.486                 |       |
| aMCI<br>DF=53                 |                              | AVLT-Immediate Recall Scores | r                     | 0.118                 | 0.226                 | 0.019 |
|                               |                              |                              | p                     | 0.195                 | <b>0.049</b>          | 0.446 |
|                               | AVLT-Delayed Recall Scores   | r                            | 0.231                 | 0.442                 | 0.149                 |       |
|                               |                              | p                            | <b>0.045</b>          | <b>&lt;0.001*</b>     | 0.138                 |       |
|                               | AVLT-Recognition Scores      | r                            | 0.164                 | 0.227                 | 0.007                 |       |
|                               |                              | p                            | 0.116                 | <b>0.048</b>          | 0.480                 |       |
|                               | MMSE                         | r                            | 0.177                 | 0.110                 | 0.023                 |       |
|                               |                              | p                            | 0.098                 | 0.213                 | 0.433                 |       |
|                               | MoCA                         | r                            | 0.241                 | 0.294                 | 0.086                 |       |
|                               |                              | p                            | <b>0.038</b>          | <b>0.015</b>          | 0.266                 |       |
|                               | d-AD<br>DF=43                | AVLT-Immediate Recall Scores | r                     | 0.021                 | 0.038                 | 0.071 |
|                               |                              |                              | p                     | 0.446                 | 0.403                 | 0.321 |
| AVLT-Delayed Recall Scores    |                              | r                            | 0.033                 | 0.030                 | 0.074                 |       |
|                               |                              | p                            | 0.415                 | 0.422                 | 0.315                 |       |
|                               |                              | r                            | 0.207                 | 0.205                 | 0.197                 |       |
|                               |                              |                              |                       |                       |                       |       |

---

|                         |   |       |              |              |
|-------------------------|---|-------|--------------|--------------|
| AVLT-Recognition Scores | p | 0.086 | 0.089        | 0.097        |
| MMSE                    | r | 0.063 | 0.264        | 0.274        |
|                         | p | 0.340 | <b>0.040</b> | <b>0.034</b> |
| MoCA                    | r | 0.011 | 0.205        | 0.151        |
|                         | p | 0.472 | 0.088        | 0.161        |

---

Table S12. Partial Pearson’s correlations between nodal efficiency and clinical performance. Partial Pearson’s correlations controlled for age, gender and education were used to assess how the nodal efficiency of the CAU.L and ORBmid.L related to clinical performance in each group. The bold numbers represent significant correlations at  $P<0.05$  without Bonferroni corrections. The star-labeled numbers represent significant correlations at  $P<0.05$  after Bonferroni corrections for the number of cognitive test variables (AVLT-immediate recall, AVLT-delayed recall, AVLT-recognition, MMSE and MoCA).

| COV: Gender & Age & Education |                              | CAU.L                        | ORBmid.L     |              |        |
|-------------------------------|------------------------------|------------------------------|--------------|--------------|--------|
|                               |                              | Efficiency                   | Efficiency   |              |        |
| NC<br>DF=49                   | AVLT-Immediate Recall Scores | r                            | -0.178       | 0.208        |        |
|                               |                              | p                            | 0.105        | 0.071        |        |
|                               | AVLT-Delayed Recall Scores   | r                            | -0.126       | 0.098        |        |
|                               |                              | p                            | 0.190        | 0.247        |        |
|                               | AVLT-Recognition Scores      | r                            | -0.035       | 0.111        |        |
|                               |                              | p                            | 0.402        | 0.218        |        |
|                               | MMSE                         | r                            | -0.006       | 0.190        |        |
|                               |                              | p                            | 0.484        | 0.091        |        |
|                               | MoCA                         | r                            | 0.054        | -0.113       |        |
|                               |                              | p                            | 0.354        | 0.216        |        |
|                               | SCD<br>DF=39                 | AVLT-Immediate Recall Scores | r            | -0.021       | -0.023 |
|                               |                              |                              | p            | 0.447        | 0.443  |
| AVLT-Delayed Recall Scores    |                              | r                            | 0.210        | -0.042       |        |
|                               |                              | p                            | 0.093        | 0.396        |        |
| AVLT-Recognition Scores       |                              | r                            | 0.021        | 0.141        |        |
|                               |                              | p                            | 0.449        | 0.189        |        |
| MMSE                          |                              | r                            | 0.138        | 0.097        |        |
|                               |                              | p                            | 0.194        | 0.274        |        |
| MoCA                          |                              | r                            | -0.125       | -0.014       |        |
|                               |                              | p                            | 0.219        | 0.466        |        |
| aMCI<br>DF=53                 |                              | AVLT-Immediate Recall Scores | r            | -0.193       | 0.098  |
|                               |                              |                              | p            | 0.079        | 0.239  |
|                               | AVLT-Delayed Recall Scores   | r                            | -0.078       | 0.119        |        |
|                               |                              | p                            | 0.286        | 0.193        |        |
|                               | AVLT-Recognition Scores      | r                            | -0.054       | 0.163        |        |
|                               |                              | p                            | 0.348        | 0.117        |        |
|                               | MMSE                         | r                            | -0.244       | 0.268        |        |
|                               |                              | p                            | <b>0.036</b> | <b>0.024</b> |        |
|                               | MoCA                         | r                            | 0.013        | 0.290        |        |
|                               |                              | p                            | 0.463        | <b>0.016</b> |        |
|                               | d-AD<br>DF=43                | AVLT-Immediate Recall Scores | r            | 0.253        | -0.045 |
|                               |                              |                              | p            | <b>0.047</b> | 0.383  |
| AVLT-Delayed Recall Scores    |                              | r                            | 0.339        | 0.317        |        |
|                               |                              | p                            | <b>0.011</b> | <b>0.017</b> |        |
|                               |                              | r                            | 0.385        | 0.167        |        |



---

|                         |   |               |        |
|-------------------------|---|---------------|--------|
| AVLT-Recognition Scores | p | <b>0.004*</b> | 0.136  |
|                         | r | 0.290         | -0.024 |
| MMSE                    | p | <b>0.026</b>  | 0.437  |
|                         | r | 0.235         | 0.001  |
| MoCA                    | p | 0.060         | 0.497  |

---

Table S13. Demographic, clinical and cognitive test variables for age-matched dataset.

| Demographics and Neuropsychological Tests | NC              | SCD             | aMCI            | d-AD            | F      | p <sup>a</sup> | Es <sup>b</sup> |
|-------------------------------------------|-----------------|-----------------|-----------------|-----------------|--------|----------------|-----------------|
|                                           | 59              | 42              | 47              | 35              |        |                |                 |
| Age (years)                               | 62.54<br>(7.60) | 63.85<br>(7.54) | 64.01<br>(7.81) | 65.96<br>(8.09) | 1.442  | 0.232          | 0.024           |
| Education (years)                         | 10.76<br>(4.80) | 11.21<br>(4.61) | 10.77<br>(4.30) | 8.94<br>(4.55)  | 1.802  | 0.148          | 0.029           |
| Gender (F/M)                              | 38/21           | 25/17           | 25/22           | 23/13           | 1.612  | 0.657          | -               |
| AVLT-Immediate Recall Scores              | 8.98<br>(1.90)  | 8.28<br>(1.82)  | 6.54<br>(1.55)  | 3.56<br>(1.85)  | 67.452 | <0.001         | 0.555           |
| AVLT-Delayed Recall Scores                | 9.77<br>(3.04)  | 8.74<br>(2.76)  | 4.44<br>(2.78)  | 1.29<br>(1.81)  | 83.524 | <0.001         | 0.607           |
| AVLT-Recognition Scores                   | 11.69<br>(2.62) | 11.07<br>(2.46) | 8.42<br>(3.51)  | 3.61<br>(3.16)  | 55.252 | <0.001         | 0.506           |
| MMSE                                      | 27.75<br>(2.26) | 27.92<br>(1.78) | 25.47<br>(3.45) | 16.97<br>(7.12) | 62.692 | <0.001         | 0.537           |
| MoCA                                      | 25.76<br>(3.37) | 25.00<br>(2.94) | 20.64<br>(3.78) | 13.13<br>(5.57) | 96.615 | <0.001         | 0.641           |

<sup>a</sup> Values for age and education derived from ANOVA; gender from chi-square test; all clinical/cognitive variables from ANCOVA with education as covariates.

<sup>b</sup> Effect size;  $\eta^2$  for demographic and clinical variables and partial  $\eta^2$  for cognitive variables.

<sup>c</sup> Least significant difference; post hoc testing on cognitive variables based on means adjusted for education.

aMCI: amnesic mild cognitive impairment; AVLT: auditory verbal learning test; d-AD: dementia of Alzheimer's disease; MMSE: mini-mental state examination; MoCA: Montreal cognitive assessment; NC: normal control; SCD: subjective cognitive decline.

Table S14. Post hoc testing on cognitive variables from ANCOVA with education as covariates for age-matched dataset.

| COV: Education                  | (I) Group | (J) Group | Mean<br>Difference<br>(I-J) | SE     | P                | 95% Confidence<br>Interval for Difference |                |        |
|---------------------------------|-----------|-----------|-----------------------------|--------|------------------|-------------------------------------------|----------------|--------|
|                                 |           |           |                             |        |                  | Lower<br>Bound                            | Upper<br>Bound |        |
| AVLT-Immediate<br>Recall Scores | NC        | SCD       | 0.783                       | 0.372  | <b>0.037</b>     | 0.048                                     | 1.518          |        |
|                                 |           | aMCI      | 2.480                       | 0.357  | <b>&lt;0.001</b> | 1.775                                     | 3.184          |        |
|                                 |           | d-AD      | 5.366                       | 0.398  | <b>&lt;0.001</b> | 4.580                                     | 6.152          |        |
|                                 | SCD       | NC        | -0.783                      | 0.372  | <b>0.037</b>     | -1.518                                    | -0.048         |        |
|                                 |           | aMCI      | 1.697                       | 0.383  | <b>&lt;0.001</b> | 0.940                                     | 2.454          |        |
|                                 |           | d-AD      | 4.583                       | 0.424  | <b>&lt;0.001</b> | 3.745                                     | 5.421          |        |
|                                 | d-AD      | NC        | SCD                         | -2.480 | 0.357            | <b>&lt;0.001</b>                          | -3.184         | -1.775 |
|                                 |           |           | aMCI                        | -1.697 | 0.383            | <b>&lt;0.001</b>                          | -2.454         | -0.940 |
|                                 |           |           | d-AD                        | 2.886  | 0.410            | <b>&lt;0.001</b>                          | 2.077          | 3.696  |
|                                 |           | SCD       | NC                          | -5.366 | 0.398            | <b>&lt;0.001</b>                          | -6.152         | -4.580 |
|                                 |           |           | aMCI                        | -4.583 | 0.424            | <b>&lt;0.001</b>                          | -5.421         | -3.745 |
|                                 |           |           | d-AD                        | -2.886 | 0.410            | <b>&lt;0.001</b>                          | -3.696         | -2.077 |
| AVLT-Delayed<br>Recall Scores   | NC        | SCD       | 1.181                       | 0.559  | <b>0.036</b>     | 0.078                                     | 2.285          |        |
|                                 |           | aMCI      | 5.398                       | 0.536  | <b>&lt;0.001</b> | 4.340                                     | 6.456          |        |
|                                 |           | d-AD      | 8.376                       | 0.597  | <b>&lt;0.001</b> | 7.196                                     | 9.555          |        |
|                                 | SCD       | NC        | -1.181                      | 0.559  | <b>0.036</b>     | -2.285                                    | -0.078         |        |
|                                 |           | aMCI      | 4.217                       | 0.576  | <b>&lt;0.001</b> | 3.080                                     | 5.354          |        |
|                                 |           | d-AD      | 7.195                       | 0.637  | <b>&lt;0.001</b> | 5.936                                     | 8.453          |        |
|                                 | d-AD      | NC        | SCD                         | -5.398 | 0.536            | <b>&lt;0.001</b>                          | -6.456         | -4.340 |
|                                 |           |           | aMCI                        | -4.217 | 0.576            | <b>&lt;0.001</b>                          | -5.354         | -3.080 |
|                                 |           |           | d-AD                        | 2.978  | 0.616            | <b>&lt;0.001</b>                          | 1.762          | 4.194  |
|                                 |           | SCD       | NC                          | -8.376 | 0.597            | <b>&lt;0.001</b>                          | -9.555         | -7.196 |
|                                 |           |           | aMCI                        | -7.195 | 0.637            | <b>&lt;0.001</b>                          | -8.453         | -5.936 |
|                                 |           |           | d-AD                        | -2.978 | 0.616            | <b>&lt;0.001</b>                          | -4.194         | -1.762 |
| AVLT-<br>Recognition<br>Scores  | NC        | SCD       | 0.743                       | 0.618  | 0.231            | -0.478                                    | 1.965          |        |
|                                 |           | aMCI      | 3.330                       | 0.593  | <b>&lt;0.001</b> | 2.159                                     | 4.501          |        |
|                                 |           | d-AD      | 7.995                       | 0.661  | <b>&lt;0.001</b> | 6.689                                     | 9.300          |        |
|                                 | SCD       | NC        | -0.743                      | 0.618  | 0.231            | -1.965                                    | 0.478          |        |
|                                 |           | aMCI      | 2.587                       | 0.637  | <b>&lt;0.001</b> | 1.329                                     | 3.845          |        |
|                                 |           | d-AD      | 7.251                       | 0.705  | <b>&lt;0.001</b> | 5.859                                     | 8.644          |        |
|                                 | d-AD      | NC        | SCD                         | -3.330 | 0.593            | <b>&lt;0.001</b>                          | -4.501         | -2.159 |
|                                 |           |           | aMCI                        | -2.587 | 0.637            | <b>&lt;0.001</b>                          | -3.845         | -1.329 |
|                                 |           |           | d-AD                        | 4.664  | 0.682            | <b>&lt;0.001</b>                          | 3.318          | 6.010  |
|                                 |           | SCD       | NC                          | -7.995 | 0.661            | <b>&lt;0.001</b>                          | -9.300         | -6.689 |
|                                 |           |           | aMCI                        | -7.251 | 0.705            | <b>&lt;0.001</b>                          | -8.644         | -5.859 |
|                                 |           |           | d-AD                        | -4.664 | 0.682            | <b>&lt;0.001</b>                          | -6.010         | -3.318 |
| MMSE                            | NC        | SCD       | 0.081                       | 0.786  | 0.918            | -1.470                                    | 1.633          |        |
|                                 |           | aMCI      | 2.403                       | 0.753  | <b>0.002</b>     | 0.916                                     | 3.890          |        |
|                                 |           | d-AD      | 10.614                      | 0.840  | <b>&lt;0.001</b> | 8.955                                     | 12.272         |        |

|  |      |      |         |       |                  |         |         |
|--|------|------|---------|-------|------------------|---------|---------|
|  |      | NC   | -0.081  | 0.786 | 0.918            | -1.633  | 1.470   |
|  | SCD  | aMCI | 2.322   | 0.809 | <b>0.005</b>     | 0.723   | 3.920   |
|  |      | d-AD | 10.532  | 0.896 | <b>&lt;0.001</b> | 8.763   | 12.301  |
|  |      | NC   | -2.403  | 0.753 | <b>0.002</b>     | -3.890  | -0.916  |
|  | aMCI | SCD  | -2.322  | 0.809 | <b>0.005</b>     | -3.920  | -0.723  |
|  |      | d-AD | 8.211   | 0.866 | <b>&lt;0.001</b> | 6.501   | 9.920   |
|  |      | NC   | -10.614 | 0.840 | <b>&lt;0.001</b> | -12.272 | -8.955  |
|  | d-AD | SCD  | -10.532 | 0.896 | <b>&lt;0.001</b> | -12.301 | -8.763  |
|  |      | aMCI | -8.211  | 0.866 | <b>&lt;0.001</b> | -9.920  | -6.501  |
|  |      | SCD  | 1.189   | 0.724 | 0.103            | -0.242  | 2.620   |
|  | NC   | aMCI | 5.322   | 0.695 | <b>&lt;0.001</b> | 3.951   | 6.694   |
|  |      | d-AD | 12.362  | 0.774 | <b>&lt;0.001</b> | 10.833  | 13.891  |
|  |      | NC   | -1.189  | 0.724 | 0.103            | -2.620  | 0.242   |
|  | SCD  | aMCI | 4.133   | 0.746 | <b>&lt;0.001</b> | 2.659   | 5.607   |
|  |      | d-AD | 11.173  | 0.826 | <b>&lt;0.001</b> | 9.542   | 12.804  |
|  |      | NC   | -5.322  | 0.695 | <b>&lt;0.001</b> | -6.694  | -3.951  |
|  | aMCI | SCD  | -4.133  | 0.746 | <b>&lt;0.001</b> | -5.607  | -2.659  |
|  |      | d-AD | 7.040   | 0.798 | <b>&lt;0.001</b> | 5.463   | 8.617   |
|  |      | NC   | -12.362 | 0.774 | <b>&lt;0.001</b> | -13.891 | -10.833 |
|  | d-AD | SCD  | -11.173 | 0.826 | <b>&lt;0.001</b> | -12.804 | -9.542  |
|  |      | aMCI | -7.040  | 0.798 | <b>&lt;0.001</b> | -8.617  | -5.463  |

MoCA

Table S15. Rich club coefficient for age-matched dataset.

| k<br>(degree) | NC    |       | SCD   |       | aMCI  |       | d-AD  |       | F      | p <sup>a</sup> | Es <sup>b</sup> |
|---------------|-------|-------|-------|-------|-------|-------|-------|-------|--------|----------------|-----------------|
|               | Mean  | SD    | Mean  | SD    | Mean  | SD    | Mean  | SD    |        |                |                 |
| 1             | 0.999 | 0.000 | 0.999 | 0.001 | 0.999 | 0.001 | 0.999 | 0.001 | 2.867  | 0.038          | 0.046           |
| 2             | 0.998 | 0.001 | 0.997 | 0.002 | 0.997 | 0.002 | 0.996 | 0.003 | 10.853 | <0.001         | 0.153           |
| 3             | 0.996 | 0.003 | 0.993 | 0.004 | 0.994 | 0.003 | 0.989 | 0.005 | 27.048 | <0.001         | 0.311           |
| 4             | 0.992 | 0.004 | 0.985 | 0.006 | 0.985 | 0.006 | 0.979 | 0.006 | 48.027 | <0.001         | 0.445           |
| 5             | 0.985 | 0.006 | 0.975 | 0.008 | 0.974 | 0.008 | 0.963 | 0.009 | 64.814 | <0.001         | 0.519           |
| 6             | 0.974 | 0.008 | 0.962 | 0.011 | 0.959 | 0.009 | 0.946 | 0.013 | 59.969 | <0.001         | 0.500           |
| 7             | 0.961 | 0.009 | 0.949 | 0.012 | 0.944 | 0.012 | 0.925 | 0.018 | 58.885 | <0.001         | 0.495           |
| 8             | 0.945 | 0.011 | 0.934 | 0.014 | 0.927 | 0.013 | 0.907 | 0.022 | 47.588 | <0.001         | 0.442           |
| 9             | 0.929 | 0.011 | 0.918 | 0.015 | 0.911 | 0.017 | 0.888 | 0.026 | 41.479 | <0.001         | 0.409           |
| 10            | 0.913 | 0.013 | 0.903 | 0.016 | 0.895 | 0.018 | 0.868 | 0.027 | 47.160 | <0.001         | 0.440           |
| 11            | 0.898 | 0.014 | 0.886 | 0.019 | 0.879 | 0.022 | 0.851 | 0.031 | 37.201 | <0.001         | 0.383           |
| 12            | 0.884 | 0.017 | 0.870 | 0.027 | 0.860 | 0.027 | 0.829 | 0.036 | 33.605 | <0.001         | 0.359           |
| 13            | 0.867 | 0.020 | 0.851 | 0.035 | 0.842 | 0.032 | 0.812 | 0.038 | 24.729 | <0.001         | 0.292           |
| 14            | 0.854 | 0.024 | 0.835 | 0.041 | 0.824 | 0.041 | 0.789 | 0.055 | 20.525 | <0.001         | 0.255           |
| 15            | 0.838 | 0.026 | 0.818 | 0.047 | 0.809 | 0.041 | 0.772 | 0.058 | 18.634 | <0.001         | 0.237           |
| 16            | 0.823 | 0.030 | 0.802 | 0.056 | 0.795 | 0.044 | 0.764 | 0.052 | 13.127 | <0.001         | 0.180           |

<sup>a</sup> Values from ANOVA.

<sup>b</sup> Effect size;  $\eta^2$  for rich club coefficient.

Table S16. Post hoc testing on rich club coefficient from ANOVA for age-matched dataset (Bonferroni-corrected for groups).

| k<br>(degree) | (I) Group | (J) Group | Mean<br>Difference<br>(I-J) | SE    | P                 | 95% Confidence<br>Interval for Difference |                |
|---------------|-----------|-----------|-----------------------------|-------|-------------------|-------------------------------------------|----------------|
|               |           |           |                             |       |                   | Lower<br>Bound                            | Upper<br>Bound |
| 1             | NC        | SCD       | 0.000                       | 0.000 | 0.387             | 0.000                                     | 0.001          |
|               |           | aMCI      | 0.000                       | 0.000 | 0.329             | 0.000                                     | 0.001          |
|               |           | d-AD      | 0.000                       | 0.000 | <b>0.042</b>      | 0.000                                     | 0.001          |
|               | SCD       | NC        | 0.000                       | 0.000 | 0.387             | -0.001                                    | 0.000          |
|               |           | aMCI      | 0.000                       | 0.000 | 1.000             | 0.000                                     | 0.000          |
|               |           | d-AD      | 0.000                       | 0.000 | 1.000             | 0.000                                     | 0.001          |
|               | aMCI      | NC        | 0.000                       | 0.000 | 0.329             | -0.001                                    | 0.000          |
|               |           | SCD       | 0.000                       | 0.000 | 1.000             | 0.000                                     | 0.000          |
|               |           | d-AD      | 0.000                       | 0.000 | 1.000             | 0.000                                     | 0.000          |
|               | d-AD      | NC        | 0.000                       | 0.000 | <b>0.042</b>      | -0.001                                    | 0.000          |
|               |           | SCD       | 0.000                       | 0.000 | 1.000             | -0.001                                    | 0.000          |
|               |           | aMCI      | 0.000                       | 0.000 | 1.000             | 0.000                                     | 0.000          |
| 2             | NC        | SCD       | 0.001                       | 0.000 | <b>0.007</b>      | 0.000                                     | 0.002          |
|               |           | aMCI      | 0.001                       | 0.000 | 0.068             | 0.000                                     | 0.002          |
|               |           | d-AD      | 0.002                       | 0.000 | <b>&lt;0.001*</b> | 0.001                                     | 0.003          |
|               | SCD       | NC        | -0.001                      | 0.000 | <b>0.007</b>      | -0.002                                    | 0.000          |
|               |           | aMCI      | 0.000                       | 0.000 | 1.000             | -0.001                                    | 0.001          |
|               |           | d-AD      | 0.001                       | 0.000 | 0.142             | 0.000                                     | 0.002          |
|               | aMCI      | NC        | -0.001                      | 0.000 | 0.068             | -0.002                                    | 0.000          |
|               |           | SCD       | 0.000                       | 0.000 | 1.000             | -0.001                                    | 0.001          |
|               |           | d-AD      | 0.001                       | 0.000 | <b>0.015</b>      | 0.000                                     | 0.003          |
|               | d-AD      | NC        | -0.002                      | 0.000 | <b>&lt;0.001*</b> | -0.003                                    | -0.001         |
|               |           | SCD       | -0.001                      | 0.000 | 0.142             | -0.002                                    | 0.000          |
|               |           | aMCI      | -0.001                      | 0.000 | <b>0.015</b>      | -0.003                                    | 0.000          |
| 3             | NC        | SCD       | 0.003                       | 0.001 | <b>&lt;0.001*</b> | 0.001                                     | 0.005          |
|               |           | aMCI      | 0.003                       | 0.001 | <b>0.003</b>      | 0.001                                     | 0.004          |
|               |           | d-AD      | 0.007                       | 0.001 | <b>&lt;0.001*</b> | 0.005                                     | 0.009          |
|               | SCD       | NC        | -0.003                      | 0.001 | <b>&lt;0.001*</b> | -0.005                                    | -0.001         |
|               |           | aMCI      | -0.001                      | 0.001 | 1.000             | -0.003                                    | 0.001          |
|               |           | d-AD      | 0.004                       | 0.001 | <b>&lt;0.001*</b> | 0.001                                     | 0.006          |
|               | aMCI      | NC        | -0.003                      | 0.001 | <b>0.003</b>      | -0.004                                    | -0.001         |
|               |           | SCD       | 0.001                       | 0.001 | 1.000             | -0.001                                    | 0.003          |
|               |           | d-AD      | 0.004                       | 0.001 | <b>&lt;0.001*</b> | 0.002                                     | 0.006          |
|               | d-AD      | NC        | -0.007                      | 0.001 | <b>&lt;0.001*</b> | -0.009                                    | -0.005         |
|               |           | SCD       | -0.004                      | 0.001 | <b>&lt;0.001*</b> | -0.006                                    | -0.001         |
|               |           | aMCI      | -0.004                      | 0.001 | <b>&lt;0.001*</b> | -0.006                                    | -0.002         |
| 4             | NC        | SCD       | 0.007                       | 0.001 | <b>&lt;0.001*</b> | 0.004                                     | 0.010          |
|               |           | aMCI      | 0.007                       | 0.001 | <b>&lt;0.001*</b> | 0.004                                     | 0.010          |
|               |           | d-AD      | 0.013                       | 0.001 | <b>&lt;0.001*</b> | 0.010                                     | 0.016          |

|   |      |      |        |       |                   |        |        |
|---|------|------|--------|-------|-------------------|--------|--------|
|   |      | NC   | -0.007 | 0.001 | <b>&lt;0.001*</b> | -0.010 | -0.004 |
|   | SCD  | aMCI | 0.000  | 0.001 | 1.000             | -0.003 | 0.003  |
|   |      | d-AD | 0.007  | 0.001 | <b>&lt;0.001*</b> | 0.003  | 0.010  |
|   |      | NC   | -0.007 | 0.001 | <b>&lt;0.001*</b> | -0.010 | -0.004 |
|   | aMCI | SCD  | 0.000  | 0.001 | 1.000             | -0.003 | 0.003  |
|   |      | d-AD | 0.006  | 0.001 | <b>&lt;0.001*</b> | 0.003  | 0.009  |
|   |      | NC   | -0.013 | 0.001 | <b>&lt;0.001*</b> | -0.016 | -0.010 |
|   | d-AD | SCD  | -0.007 | 0.001 | <b>&lt;0.001*</b> | -0.010 | -0.003 |
|   |      | aMCI | -0.006 | 0.001 | <b>&lt;0.001*</b> | -0.009 | -0.003 |
|   |      | SCD  | 0.010  | 0.002 | <b>&lt;0.001*</b> | 0.006  | 0.014  |
|   | NC   | aMCI | 0.011  | 0.001 | <b>&lt;0.001*</b> | 0.007  | 0.015  |
|   |      | d-AD | 0.022  | 0.002 | <b>&lt;0.001*</b> | 0.018  | 0.026  |
|   |      | NC   | -0.010 | 0.002 | <b>&lt;0.001*</b> | -0.014 | -0.006 |
|   | SCD  | aMCI | 0.002  | 0.002 | 1.000             | -0.003 | 0.006  |
|   |      | d-AD | 0.012  | 0.002 | <b>&lt;0.001*</b> | 0.008  | 0.017  |
| 5 |      | NC   | -0.011 | 0.001 | <b>&lt;0.001*</b> | -0.015 | -0.007 |
|   | aMCI | SCD  | -0.002 | 0.002 | 1.000             | -0.006 | 0.003  |
|   |      | d-AD | 0.011  | 0.002 | <b>&lt;0.001*</b> | 0.006  | 0.015  |
|   |      | NC   | -0.022 | 0.002 | <b>&lt;0.001*</b> | -0.026 | -0.018 |
|   | d-AD | SCD  | -0.012 | 0.002 | <b>&lt;0.001*</b> | -0.017 | -0.008 |
|   |      | aMCI | -0.011 | 0.002 | <b>&lt;0.001*</b> | -0.015 | -0.006 |
|   |      | SCD  | 0.012  | 0.002 | <b>&lt;0.001*</b> | 0.006  | 0.017  |
|   | NC   | aMCI | 0.015  | 0.002 | <b>&lt;0.001*</b> | 0.010  | 0.020  |
|   |      | d-AD | 0.028  | 0.002 | <b>&lt;0.001*</b> | 0.022  | 0.034  |
|   |      | NC   | -0.012 | 0.002 | <b>&lt;0.001*</b> | -0.017 | -0.006 |
|   | SCD  | aMCI | 0.003  | 0.002 | 0.766             | -0.002 | 0.009  |
|   |      | d-AD | 0.017  | 0.002 | <b>&lt;0.001*</b> | 0.010  | 0.023  |
| 6 |      | NC   | -0.015 | 0.002 | <b>&lt;0.001*</b> | -0.020 | -0.010 |
|   | aMCI | SCD  | -0.003 | 0.002 | 0.766             | -0.009 | 0.002  |
|   |      | d-AD | 0.013  | 0.002 | <b>&lt;0.001*</b> | 0.007  | 0.019  |
|   |      | NC   | -0.028 | 0.002 | <b>&lt;0.001*</b> | -0.034 | -0.022 |
|   | d-AD | SCD  | -0.017 | 0.002 | <b>&lt;0.001*</b> | -0.023 | -0.010 |
|   |      | aMCI | -0.013 | 0.002 | <b>&lt;0.001*</b> | -0.019 | -0.007 |
|   |      | SCD  | 0.012  | 0.003 | <b>&lt;0.001*</b> | 0.005  | 0.019  |
|   | NC   | aMCI | 0.017  | 0.002 | <b>&lt;0.001*</b> | 0.010  | 0.024  |
|   |      | d-AD | 0.035  | 0.003 | <b>&lt;0.001*</b> | 0.028  | 0.043  |
|   |      | NC   | -0.012 | 0.003 | <b>&lt;0.001*</b> | -0.019 | -0.005 |
|   | SCD  | aMCI | 0.005  | 0.003 | 0.374             | -0.002 | 0.012  |
|   |      | d-AD | 0.023  | 0.003 | <b>&lt;0.001*</b> | 0.016  | 0.031  |
| 7 |      | NC   | -0.017 | 0.002 | <b>&lt;0.001*</b> | -0.024 | -0.010 |
|   | aMCI | SCD  | -0.005 | 0.003 | 0.374             | -0.012 | 0.002  |
|   |      | d-AD | 0.018  | 0.003 | <b>&lt;0.001*</b> | 0.011  | 0.026  |
|   |      | NC   | -0.035 | 0.003 | <b>&lt;0.001*</b> | -0.043 | -0.028 |
|   | d-AD | SCD  | -0.023 | 0.003 | <b>&lt;0.001*</b> | -0.031 | -0.016 |
|   |      | aMCI | -0.018 | 0.003 | <b>&lt;0.001*</b> | -0.026 | -0.011 |
| 8 |      | SCD  | 0.011  | 0.003 | <b>0.004</b>      | 0.002  | 0.019  |
|   | NC   | aMCI | 0.018  | 0.003 | <b>&lt;0.001*</b> | 0.010  | 0.026  |

|    |      |      |        |       |              |        |        |
|----|------|------|--------|-------|--------------|--------|--------|
|    |      | d-AD | 0.037  | 0.003 | <0.001*      | 0.029  | 0.046  |
|    | SCD  | NC   | -0.011 | 0.003 | <b>0.004</b> | -0.019 | -0.002 |
|    |      | aMCI | 0.007  | 0.003 | 0.165        | -0.001 | 0.016  |
|    |      | d-AD | 0.027  | 0.003 | <0.001*      | 0.018  | 0.036  |
|    | aMCI | NC   | -0.018 | 0.003 | <0.001*      | -0.026 | -0.010 |
|    |      | SCD  | -0.007 | 0.003 | 0.165        | -0.016 | 0.001  |
|    |      | d-AD | 0.020  | 0.003 | <0.001*      | 0.011  | 0.029  |
|    | d-AD | NC   | -0.037 | 0.003 | <0.001*      | -0.046 | -0.029 |
|    |      | SCD  | -0.027 | 0.003 | <0.001*      | -0.036 | -0.018 |
|    |      | aMCI | -0.020 | 0.003 | <0.001*      | -0.029 | -0.011 |
| 9  | NC   | SCD  | 0.011  | 0.004 | <b>0.018</b> | 0.001  | 0.020  |
|    |      | aMCI | 0.017  | 0.003 | <0.001*      | 0.008  | 0.026  |
|    |      | d-AD | 0.040  | 0.004 | <0.001*      | 0.031  | 0.050  |
|    | SCD  | NC   | -0.011 | 0.004 | <b>0.018</b> | -0.020 | -0.001 |
|    |      | aMCI | 0.007  | 0.004 | 0.429        | -0.003 | 0.017  |
|    |      | d-AD | 0.030  | 0.004 | <0.001*      | 0.019  | 0.040  |
|    | aMCI | NC   | -0.017 | 0.003 | <0.001*      | -0.026 | -0.008 |
|    |      | SCD  | -0.007 | 0.004 | 0.429        | -0.017 | 0.003  |
|    |      | d-AD | 0.023  | 0.004 | <0.001*      | 0.013  | 0.033  |
|    | d-AD | NC   | -0.040 | 0.004 | <0.001*      | -0.050 | -0.031 |
|    |      | SCD  | -0.030 | 0.004 | <0.001*      | -0.040 | -0.019 |
|    |      | aMCI | -0.023 | 0.004 | <0.001*      | -0.033 | -0.013 |
| 10 | NC   | SCD  | 0.011  | 0.004 | <b>0.026</b> | 0.001  | 0.020  |
|    |      | aMCI | 0.018  | 0.004 | <0.001*      | 0.009  | 0.028  |
|    |      | d-AD | 0.045  | 0.004 | <0.001*      | 0.035  | 0.055  |
|    | SCD  | NC   | -0.011 | 0.004 | <b>0.026</b> | -0.020 | -0.001 |
|    |      | aMCI | 0.007  | 0.004 | 0.326        | -0.003 | 0.018  |
|    |      | d-AD | 0.034  | 0.004 | <0.001*      | 0.023  | 0.045  |
|    | aMCI | NC   | -0.018 | 0.004 | <0.001*      | -0.028 | -0.009 |
|    |      | SCD  | -0.007 | 0.004 | 0.326        | -0.018 | 0.003  |
|    |      | d-AD | 0.027  | 0.004 | <0.001*      | 0.016  | 0.038  |
|    | d-AD | NC   | -0.045 | 0.004 | <0.001*      | -0.055 | -0.035 |
|    |      | SCD  | -0.034 | 0.004 | <0.001*      | -0.045 | -0.023 |
|    |      | aMCI | -0.027 | 0.004 | <0.001*      | -0.038 | -0.016 |
| 11 | NC   | SCD  | 0.012  | 0.004 | <b>0.032</b> | 0.001  | 0.024  |
|    |      | aMCI | 0.019  | 0.004 | <0.001*      | 0.008  | 0.030  |
|    |      | d-AD | 0.048  | 0.005 | <0.001*      | 0.035  | 0.060  |
|    | SCD  | NC   | -0.012 | 0.004 | <b>0.032</b> | -0.024 | -0.001 |
|    |      | aMCI | 0.007  | 0.005 | 0.828        | -0.005 | 0.019  |
|    |      | d-AD | 0.035  | 0.005 | <0.001*      | 0.022  | 0.048  |
|    | aMCI | NC   | -0.019 | 0.004 | <0.001*      | -0.030 | -0.008 |
|    |      | SCD  | -0.007 | 0.005 | 0.828        | -0.019 | 0.005  |
|    |      | d-AD | 0.029  | 0.005 | <0.001*      | 0.016  | 0.041  |
|    | d-AD | NC   | -0.048 | 0.005 | <0.001*      | -0.060 | -0.035 |
|    |      | SCD  | -0.035 | 0.005 | <0.001*      | -0.048 | -0.022 |
|    |      | aMCI | -0.029 | 0.005 | <0.001*      | -0.041 | -0.016 |
|    |      | SCD  | 0.014  | 0.005 | 0.069        | -0.001 | 0.028  |



|      |      |      |        |       |                  |        |        |
|------|------|------|--------|-------|------------------|--------|--------|
| 12   | NC   | aMCI | 0.023  | 0.005 | < <b>0.001</b> * | 0.010  | 0.037  |
|      |      | d-AD | 0.055  | 0.006 | < <b>0.001</b> * | 0.040  | 0.070  |
|      | SCD  | NC   | -0.014 | 0.005 | 0.069            | -0.028 | 0.001  |
|      |      | aMCI | 0.010  | 0.006 | 0.507            | -0.005 | 0.025  |
|      |      | d-AD | 0.041  | 0.006 | < <b>0.001</b> * | 0.025  | 0.057  |
|      | aMCI | NC   | -0.023 | 0.005 | < <b>0.001</b> * | -0.037 | -0.010 |
|      |      | SCD  | -0.010 | 0.006 | 0.507            | -0.025 | 0.005  |
|      |      | d-AD | 0.032  | 0.006 | < <b>0.001</b> * | 0.016  | 0.047  |
|      | d-AD | NC   | -0.055 | 0.006 | < <b>0.001</b> * | -0.070 | -0.040 |
|      |      | SCD  | -0.041 | 0.006 | < <b>0.001</b> * | -0.057 | -0.025 |
|      |      | aMCI | -0.032 | 0.006 | < <b>0.001</b> * | -0.047 | -0.016 |
|      | 13   | NC   | SCD    | 0.016 | 0.006            | 0.067  | -0.001 |
| aMCI |      |      | 0.025  | 0.006 | < <b>0.001</b> * | 0.009  | 0.041  |
| d-AD |      |      | 0.055  | 0.006 | < <b>0.001</b> * | 0.038  | 0.072  |
| SCD  |      | NC   | -0.016 | 0.006 | 0.067            | -0.032 | 0.001  |
|      |      | aMCI | 0.009  | 0.007 | 1.000            | -0.009 | 0.026  |
|      |      | d-AD | 0.039  | 0.007 | < <b>0.001</b> * | 0.021  | 0.058  |
| aMCI |      | NC   | -0.025 | 0.006 | < <b>0.001</b> * | -0.041 | -0.009 |
|      |      | SCD  | -0.009 | 0.007 | 1.000            | -0.026 | 0.009  |
|      |      | d-AD | 0.030  | 0.007 | < <b>0.001</b> * | 0.012  | 0.049  |
| d-AD |      | NC   | -0.055 | 0.006 | < <b>0.001</b> * | -0.072 | -0.038 |
|      |      | SCD  | -0.039 | 0.007 | < <b>0.001</b> * | -0.058 | -0.021 |
|      |      | aMCI | -0.030 | 0.007 | < <b>0.001</b> * | -0.049 | -0.012 |
| 14   | NC   | SCD  | 0.019  | 0.008 | 0.102            | -0.002 | 0.041  |
|      |      | aMCI | 0.030  | 0.008 | <b>0.001</b>     | 0.009  | 0.051  |
|      |      | d-AD | 0.065  | 0.008 | < <b>0.001</b> * | 0.043  | 0.088  |
|      | SCD  | NC   | -0.019 | 0.008 | 0.102            | -0.041 | 0.002  |
|      |      | aMCI | 0.011  | 0.008 | 1.000            | -0.012 | 0.034  |
|      |      | d-AD | 0.046  | 0.009 | < <b>0.001</b> * | 0.022  | 0.070  |
|      | aMCI | NC   | -0.030 | 0.008 | <b>0.001</b>     | -0.051 | -0.009 |
|      |      | SCD  | -0.011 | 0.008 | 1.000            | -0.034 | 0.012  |
|      |      | d-AD | 0.035  | 0.009 | <b>0.001</b>     | 0.012  | 0.059  |
|      | d-AD | NC   | -0.065 | 0.008 | < <b>0.001</b> * | -0.088 | -0.043 |
|      |      | SCD  | -0.046 | 0.009 | < <b>0.001</b> * | -0.070 | -0.022 |
|      |      | aMCI | -0.035 | 0.009 | <b>0.001</b>     | -0.059 | -0.012 |
| 15   | NC   | SCD  | 0.020  | 0.009 | 0.137            | -0.003 | 0.043  |
|      |      | aMCI | 0.029  | 0.008 | <b>0.003</b>     | 0.007  | 0.052  |
|      |      | d-AD | 0.067  | 0.009 | < <b>0.001</b> * | 0.043  | 0.090  |
|      | SCD  | NC   | -0.020 | 0.009 | 0.137            | -0.043 | 0.003  |
|      |      | aMCI | 0.010  | 0.009 | 1.000            | -0.014 | 0.034  |
|      |      | d-AD | 0.047  | 0.010 | < <b>0.001</b> * | 0.021  | 0.073  |
|      | aMCI | NC   | -0.029 | 0.008 | <b>0.003</b>     | -0.052 | -0.007 |
|      |      | SCD  | -0.010 | 0.009 | 1.000            | -0.034 | 0.014  |
|      |      | d-AD | 0.037  | 0.009 | <b>0.001</b>     | 0.012  | 0.062  |
|      | d-AD | NC   | -0.067 | 0.009 | < <b>0.001</b> * | -0.090 | -0.043 |
|      |      | SCD  | -0.047 | 0.010 | < <b>0.001</b> * | -0.073 | -0.021 |
|      |      | aMCI | -0.037 | 0.009 | <b>0.001</b>     | -0.062 | -0.012 |

---

|    |      |      |        |       |                   |        |        |
|----|------|------|--------|-------|-------------------|--------|--------|
|    |      | SCD  | 0.022  | 0.009 | 0.113             | -0.003 | 0.046  |
|    | NC   | aMCI | 0.029  | 0.009 | <b>0.008</b>      | 0.005  | 0.052  |
|    |      | d-AD | 0.059  | 0.010 | <b>&lt;0.001*</b> | 0.034  | 0.085  |
|    |      | NC   | -0.022 | 0.009 | 0.113             | -0.046 | 0.003  |
|    | SCD  | aMCI | 0.007  | 0.010 | 1.000             | -0.018 | 0.033  |
|    |      | d-AD | 0.038  | 0.010 | <b>0.002</b>      | 0.010  | 0.065  |
| 16 |      | NC   | -0.029 | 0.009 | <b>0.008</b>      | -0.052 | -0.005 |
|    | aMCI | SCD  | -0.007 | 0.010 | 1.000             | -0.033 | 0.018  |
|    |      | d-AD | 0.031  | 0.010 | <b>0.015</b>      | 0.004  | 0.057  |
|    |      | NC   | -0.059 | 0.010 | <b>&lt;0.001*</b> | -0.085 | -0.034 |
|    | d-AD | SCD  | -0.038 | 0.010 | <b>0.002</b>      | -0.065 | -0.010 |
|    |      | aMCI | -0.031 | 0.010 | <b>0.015</b>      | -0.057 | -0.004 |

---

Table S17. Normalized rich club coefficient for age-matched dataset.

| k<br>(degree) | NC    |       | SCD   |       | aMCI  |       | d-AD  |       | F      | p <sup>a</sup> | Es <sup>b</sup> |
|---------------|-------|-------|-------|-------|-------|-------|-------|-------|--------|----------------|-----------------|
|               | Mean  | SD    | Mean  | SD    | Mean  | SD    | Mean  | SD    |        |                |                 |
| 1             | 1.000 | 0.000 | 1.000 | 0.000 | 1.000 | 0.000 | 1.000 | 0.000 | 1.497  | 0.217          | 0.024           |
| 2             | 1.001 | 0.001 | 1.001 | 0.001 | 1.001 | 0.001 | 1.001 | 0.001 | 3.774  | 0.012          | 0.059           |
| 3             | 1.001 | 0.001 | 1.002 | 0.002 | 1.002 | 0.001 | 1.003 | 0.002 | 5.062  | 0.002          | 0.078           |
| 4             | 1.002 | 0.002 | 1.003 | 0.003 | 1.004 | 0.003 | 1.005 | 0.004 | 13.030 | <0.001         | 0.178           |
| 5             | 1.003 | 0.002 | 1.004 | 0.004 | 1.006 | 0.003 | 1.009 | 0.005 | 24.371 | <0.001         | 0.289           |
| 6             | 1.004 | 0.003 | 1.007 | 0.005 | 1.009 | 0.005 | 1.014 | 0.007 | 36.300 | <0.001         | 0.377           |
| 7             | 1.006 | 0.004 | 1.010 | 0.007 | 1.014 | 0.006 | 1.019 | 0.011 | 33.950 | <0.001         | 0.361           |
| 8             | 1.008 | 0.004 | 1.015 | 0.008 | 1.019 | 0.008 | 1.027 | 0.013 | 39.639 | <0.001         | 0.398           |
| 9             | 1.011 | 0.006 | 1.022 | 0.009 | 1.023 | 0.010 | 1.032 | 0.015 | 35.980 | <0.001         | 0.375           |
| 10            | 1.015 | 0.008 | 1.027 | 0.010 | 1.029 | 0.011 | 1.037 | 0.016 | 31.503 | <0.001         | 0.344           |
| 11            | 1.018 | 0.009 | 1.032 | 0.013 | 1.032 | 0.011 | 1.040 | 0.017 | 28.453 | <0.001         | 0.322           |
| 12            | 1.022 | 0.011 | 1.036 | 0.016 | 1.034 | 0.014 | 1.043 | 0.020 | 15.944 | <0.001         | 0.210           |
| 13            | 1.024 | 0.012 | 1.041 | 0.023 | 1.036 | 0.017 | 1.048 | 0.023 | 14.381 | <0.001         | 0.193           |
| 14            | 1.028 | 0.015 | 1.044 | 0.025 | 1.039 | 0.023 | 1.017 | 0.178 | 0.916  | 0.434          | 0.015           |
| 15            | 1.030 | 0.016 | 1.050 | 0.033 | 1.051 | 0.028 | 0.935 | 0.338 | 5.128  | 0.002          | 0.079           |
| 16            | 1.033 | 0.021 | 1.036 | 0.168 | 1.038 | 0.159 | 0.835 | 0.454 | 7.350  | <0.001         | 0.109           |

<sup>a</sup> Values from ANOVA.

<sup>b</sup> Effect size;  $\eta^2$  for normalized rich club coefficient.

Table S18. Post hoc testing on normalized rich club coefficient from ANOVA for age-matched dataset (Bonferroni-corrected for groups).

| k<br>(degree) | (I) Group | (J) Group | Mean<br>Difference<br>(I-J) | SE    | P                 | 95% Confidence<br>Interval for Difference |                |
|---------------|-----------|-----------|-----------------------------|-------|-------------------|-------------------------------------------|----------------|
|               |           |           |                             |       |                   | Lower<br>Bound                            | Upper<br>Bound |
| 1             | NC        | SCD       | 0.000                       | 0.000 | 1.000             | 0.000                                     | 0.000          |
|               |           | aMCI      | 0.000                       | 0.000 | 1.000             | 0.000                                     | 0.000          |
|               |           | d-AD      | 0.000                       | 0.000 | 1.000             | 0.000                                     | 0.000          |
|               | SCD       | NC        | 0.000                       | 0.000 | 1.000             | 0.000                                     | 0.000          |
|               |           | aMCI      | 0.000                       | 0.000 | 0.498             | 0.000                                     | 0.000          |
|               |           | d-AD      | 0.000                       | 0.000 | 1.000             | 0.000                                     | 0.000          |
|               | aMCI      | NC        | 0.000                       | 0.000 | 1.000             | 0.000                                     | 0.000          |
|               |           | SCD       | 0.000                       | 0.000 | 0.498             | 0.000                                     | 0.000          |
|               |           | d-AD      | 0.000                       | 0.000 | 0.384             | 0.000                                     | 0.000          |
|               | d-AD      | NC        | 0.000                       | 0.000 | 1.000             | 0.000                                     | 0.000          |
|               |           | SCD       | 0.000                       | 0.000 | 1.000             | 0.000                                     | 0.000          |
|               |           | aMCI      | 0.000                       | 0.000 | 0.384             | 0.000                                     | 0.000          |
| 2             | NC        | SCD       | 0.000                       | 0.000 | <b>0.049</b>      | -0.001                                    | 0.000          |
|               |           | aMCI      | 0.000                       | 0.000 | 0.312             | -0.001                                    | 0.000          |
|               |           | d-AD      | -0.001                      | 0.000 | <b>0.024</b>      | -0.001                                    | 0.000          |
|               | SCD       | NC        | 0.000                       | 0.000 | <b>0.049</b>      | 0.000                                     | 0.001          |
|               |           | aMCI      | 0.000                       | 0.000 | 1.000             | 0.000                                     | 0.001          |
|               |           | d-AD      | 0.000                       | 0.000 | 1.000             | -0.001                                    | 0.000          |
|               | aMCI      | NC        | 0.000                       | 0.000 | 0.312             | 0.000                                     | 0.001          |
|               |           | SCD       | 0.000                       | 0.000 | 1.000             | -0.001                                    | 0.000          |
|               |           | d-AD      | 0.000                       | 0.000 | 1.000             | -0.001                                    | 0.000          |
|               | d-AD      | NC        | 0.001                       | 0.000 | <b>0.024</b>      | 0.000                                     | 0.001          |
|               |           | SCD       | 0.000                       | 0.000 | 1.000             | 0.000                                     | 0.001          |
|               |           | aMCI      | 0.000                       | 0.000 | 1.000             | 0.000                                     | 0.001          |
| 3             | NC        | SCD       | -0.001                      | 0.000 | 0.079             | -0.002                                    | 0.000          |
|               |           | aMCI      | -0.001                      | 0.000 | 0.191             | -0.002                                    | 0.000          |
|               |           | d-AD      | -0.001                      | 0.000 | <b>0.002</b>      | -0.002                                    | 0.000          |
|               | SCD       | NC        | 0.001                       | 0.000 | 0.079             | 0.000                                     | 0.002          |
|               |           | aMCI      | 0.000                       | 0.000 | 1.000             | -0.001                                    | 0.001          |
|               |           | d-AD      | 0.000                       | 0.000 | 1.000             | -0.002                                    | 0.001          |
|               | aMCI      | NC        | 0.001                       | 0.000 | 0.191             | 0.000                                     | 0.002          |
|               |           | SCD       | 0.000                       | 0.000 | 1.000             | -0.001                                    | 0.001          |
|               |           | d-AD      | -0.001                      | 0.000 | 0.620             | -0.002                                    | 0.000          |
|               | d-AD      | NC        | 0.001                       | 0.000 | <b>0.002</b>      | 0.000                                     | 0.002          |
|               |           | SCD       | 0.000                       | 0.000 | 1.000             | -0.001                                    | 0.002          |
|               |           | aMCI      | 0.001                       | 0.000 | 0.620             | 0.000                                     | 0.002          |
| 4             | NC        | SCD       | -0.001                      | 0.001 | 0.178             | -0.003                                    | 0.000          |
|               |           | aMCI      | -0.002                      | 0.001 | <b>0.003</b>      | -0.003                                    | 0.000          |
|               |           | d-AD      | -0.004                      | 0.001 | <b>&lt;0.001*</b> | -0.005                                    | -0.002         |

|   |      |      |        |       |                   |        |        |
|---|------|------|--------|-------|-------------------|--------|--------|
|   |      | NC   | 0.001  | 0.001 | 0.178             | 0.000  | 0.003  |
|   | SCD  | aMCI | -0.001 | 0.001 | 1.000             | -0.002 | 0.001  |
|   |      | d-AD | -0.002 | 0.001 | <b>0.001</b>      | -0.004 | -0.001 |
|   | aMCI | NC   | 0.002  | 0.001 | <b>0.003</b>      | 0.000  | 0.003  |
|   |      | SCD  | 0.001  | 0.001 | 1.000             | -0.001 | 0.002  |
|   |      | d-AD | -0.002 | 0.001 | <b>0.042</b>      | -0.003 | 0.000  |
|   | d-AD | NC   | 0.004  | 0.001 | <b>&lt;0.001*</b> | 0.002  | 0.005  |
|   |      | SCD  | 0.002  | 0.001 | <b>0.001</b>      | 0.001  | 0.004  |
|   |      | aMCI | 0.002  | 0.001 | <b>0.042</b>      | 0.000  | 0.003  |
|   | NC   | SCD  | -0.002 | 0.001 | 0.129             | -0.003 | 0.000  |
|   |      | aMCI | -0.004 | 0.001 | <b>&lt;0.001*</b> | -0.005 | -0.002 |
|   |      | d-AD | -0.006 | 0.001 | <b>&lt;0.001*</b> | -0.008 | -0.004 |
| 5 | SCD  | NC   | 0.002  | 0.001 | 0.129             | 0.000  | 0.003  |
|   |      | aMCI | -0.002 | 0.001 | 0.053             | -0.004 | 0.000  |
|   |      | d-AD | -0.004 | 0.001 | <b>&lt;0.001*</b> | -0.006 | -0.002 |
|   | aMCI | NC   | 0.004  | 0.001 | <b>&lt;0.001*</b> | 0.002  | 0.005  |
|   |      | SCD  | 0.002  | 0.001 | 0.053             | 0.000  | 0.004  |
|   |      | d-AD | -0.002 | 0.001 | <b>0.015</b>      | -0.004 | 0.000  |
|   | d-AD | NC   | 0.006  | 0.001 | <b>&lt;0.001*</b> | 0.004  | 0.008  |
|   |      | SCD  | 0.004  | 0.001 | <b>&lt;0.001*</b> | 0.002  | 0.006  |
|   |      | aMCI | 0.002  | 0.001 | <b>0.015</b>      | 0.000  | 0.004  |
|   | NC   | SCD  | -0.003 | 0.001 | <b>0.009</b>      | -0.006 | -0.001 |
|   |      | aMCI | -0.006 | 0.001 | <b>&lt;0.001*</b> | -0.008 | -0.003 |
|   |      | d-AD | -0.010 | 0.001 | <b>&lt;0.001*</b> | -0.013 | -0.008 |
| 6 | SCD  | NC   | 0.003  | 0.001 | <b>0.009</b>      | 0.001  | 0.006  |
|   |      | aMCI | -0.003 | 0.001 | 0.075             | -0.005 | 0.000  |
|   |      | d-AD | -0.007 | 0.001 | <b>&lt;0.001*</b> | -0.010 | -0.004 |
|   | aMCI | NC   | 0.006  | 0.001 | <b>&lt;0.001*</b> | 0.003  | 0.008  |
|   |      | SCD  | 0.003  | 0.001 | 0.075             | 0.000  | 0.005  |
|   |      | d-AD | -0.005 | 0.001 | <b>&lt;0.001*</b> | -0.007 | -0.002 |
|   | d-AD | NC   | 0.010  | 0.001 | <b>&lt;0.001*</b> | 0.008  | 0.013  |
|   |      | SCD  | 0.007  | 0.001 | <b>&lt;0.001*</b> | 0.004  | 0.010  |
|   |      | aMCI | 0.005  | 0.001 | <b>&lt;0.001*</b> | 0.002  | 0.007  |
|   | NC   | SCD  | -0.005 | 0.001 | <b>0.005</b>      | -0.008 | -0.001 |
|   |      | aMCI | -0.008 | 0.001 | <b>&lt;0.001*</b> | -0.012 | -0.005 |
|   |      | d-AD | -0.014 | 0.001 | <b>&lt;0.001*</b> | -0.018 | -0.010 |
| 7 | SCD  | NC   | 0.005  | 0.001 | <b>0.005</b>      | 0.001  | 0.008  |
|   |      | aMCI | -0.004 | 0.001 | 0.055             | -0.008 | 0.000  |
|   |      | d-AD | -0.009 | 0.002 | <b>&lt;0.001*</b> | -0.013 | -0.005 |
|   | aMCI | NC   | 0.008  | 0.001 | <b>&lt;0.001*</b> | 0.005  | 0.012  |
|   |      | SCD  | 0.004  | 0.001 | 0.055             | 0.000  | 0.008  |
|   |      | d-AD | -0.005 | 0.002 | <b>0.002</b>      | -0.009 | -0.001 |
|   | d-AD | NC   | 0.014  | 0.001 | <b>&lt;0.001*</b> | 0.010  | 0.018  |
|   |      | SCD  | 0.009  | 0.002 | <b>&lt;0.001*</b> | 0.005  | 0.013  |
|   |      | aMCI | 0.005  | 0.002 | <b>0.002</b>      | 0.001  | 0.009  |
| 8 | NC   | SCD  | -0.007 | 0.002 | <b>&lt;0.001*</b> | -0.012 | -0.003 |
|   |      | aMCI | -0.011 | 0.002 | <b>&lt;0.001*</b> | -0.015 | -0.007 |

|    |      |      |        |       |              |        |        |
|----|------|------|--------|-------|--------------|--------|--------|
|    |      | d-AD | -0.018 | 0.002 | <0.001*      | -0.023 | -0.014 |
|    | SCD  | NC   | 0.007  | 0.002 | <0.001*      | 0.003  | 0.012  |
|    |      | aMCI | -0.004 | 0.002 | 0.213        | -0.008 | 0.001  |
|    |      | d-AD | -0.011 | 0.002 | <0.001*      | -0.016 | -0.006 |
|    | aMCI | NC   | 0.011  | 0.002 | <0.001*      | 0.007  | 0.015  |
|    |      | SCD  | 0.004  | 0.002 | 0.213        | -0.001 | 0.008  |
|    |      | d-AD | -0.008 | 0.002 | <0.001*      | -0.012 | -0.003 |
|    | d-AD | NC   | 0.018  | 0.002 | <0.001*      | 0.014  | 0.023  |
|    |      | SCD  | 0.011  | 0.002 | <0.001*      | 0.006  | 0.016  |
|    |      | aMCI | 0.008  | 0.002 | <0.001*      | 0.003  | 0.012  |
| 9  | NC   | SCD  | -0.011 | 0.002 | <0.001*      | -0.016 | -0.006 |
|    |      | aMCI | -0.012 | 0.002 | <0.001*      | -0.017 | -0.007 |
|    |      | d-AD | -0.021 | 0.002 | <0.001*      | -0.027 | -0.016 |
|    | SCD  | NC   | 0.011  | 0.002 | <0.001*      | 0.006  | 0.016  |
|    |      | aMCI | -0.001 | 0.002 | 1.000        | -0.007 | 0.004  |
|    |      | d-AD | -0.010 | 0.002 | <0.001*      | -0.016 | -0.004 |
|    | aMCI | NC   | 0.012  | 0.002 | <0.001*      | 0.007  | 0.017  |
|    |      | SCD  | 0.001  | 0.002 | 1.000        | -0.004 | 0.007  |
|    |      | d-AD | -0.009 | 0.002 | <0.001*      | -0.015 | -0.003 |
|    | d-AD | NC   | 0.021  | 0.002 | <0.001*      | 0.016  | 0.027  |
|    |      | SCD  | 0.010  | 0.002 | <0.001*      | 0.004  | 0.016  |
|    |      | aMCI | 0.009  | 0.002 | <0.001*      | 0.003  | 0.015  |
| 10 | NC   | SCD  | -0.012 | 0.002 | <0.001*      | -0.018 | -0.006 |
|    |      | aMCI | -0.014 | 0.002 | <0.001*      | -0.020 | -0.008 |
|    |      | d-AD | -0.022 | 0.002 | <0.001*      | -0.028 | -0.016 |
|    | SCD  | NC   | 0.012  | 0.002 | <0.001*      | 0.006  | 0.018  |
|    |      | aMCI | -0.002 | 0.002 | 1.000        | -0.008 | 0.004  |
|    |      | d-AD | -0.010 | 0.003 | <0.001*      | -0.017 | -0.003 |
|    | aMCI | NC   | 0.014  | 0.002 | <0.001*      | 0.008  | 0.020  |
|    |      | SCD  | 0.002  | 0.002 | 1.000        | -0.004 | 0.008  |
|    |      | d-AD | -0.008 | 0.002 | <b>0.008</b> | -0.015 | -0.001 |
|    | d-AD | NC   | 0.022  | 0.002 | <0.001*      | 0.016  | 0.028  |
|    |      | SCD  | 0.010  | 0.003 | <0.001*      | 0.003  | 0.017  |
|    |      | aMCI | 0.008  | 0.002 | <b>0.008</b> | 0.001  | 0.015  |
| 11 | NC   | SCD  | -0.014 | 0.002 | <0.001*      | -0.020 | -0.007 |
|    |      | aMCI | -0.014 | 0.002 | <0.001*      | -0.020 | -0.007 |
|    |      | d-AD | -0.023 | 0.003 | <0.001*      | -0.029 | -0.016 |
|    | SCD  | NC   | 0.014  | 0.002 | <0.001*      | 0.007  | 0.020  |
|    |      | aMCI | 0.000  | 0.003 | 1.000        | -0.007 | 0.007  |
|    |      | d-AD | -0.009 | 0.003 | <b>0.010</b> | -0.016 | -0.001 |
|    | aMCI | NC   | 0.014  | 0.002 | <0.001*      | 0.007  | 0.020  |
|    |      | SCD  | 0.000  | 0.003 | 1.000        | -0.007 | 0.007  |
|    |      | d-AD | -0.009 | 0.003 | <b>0.007</b> | -0.016 | -0.002 |
|    | d-AD | NC   | 0.023  | 0.003 | <0.001*      | 0.016  | 0.029  |
|    |      | SCD  | 0.009  | 0.003 | <b>0.010</b> | 0.001  | 0.016  |
|    |      | aMCI | 0.009  | 0.003 | <b>0.007</b> | 0.002  | 0.016  |
|    |      | SCD  | -0.014 | 0.003 | <0.001*      | -0.022 | -0.006 |

|      |      |      |        |        |                   |                   |        |
|------|------|------|--------|--------|-------------------|-------------------|--------|
| 12   | NC   | aMCI | -0.012 | 0.003  | <b>&lt;0.001*</b> | -0.020            | -0.004 |
|      |      | d-AD | -0.021 | 0.003  | <b>&lt;0.001*</b> | -0.029            | -0.012 |
|      | SCD  | NC   | 0.014  | 0.003  | <b>&lt;0.001*</b> | 0.006             | 0.022  |
|      |      | aMCI | 0.002  | 0.003  | 1.000             | -0.007            | 0.010  |
|      |      | d-AD | -0.007 | 0.003  | 0.257             | -0.016            | 0.002  |
|      | aMCI | NC   | 0.012  | 0.003  | <b>&lt;0.001*</b> | 0.004             | 0.020  |
|      |      | SCD  | -0.002 | 0.003  | 1.000             | -0.010            | 0.007  |
|      |      | d-AD | -0.009 | 0.003  | 0.066             | -0.018            | 0.000  |
|      | d-AD | NC   | 0.021  | 0.003  | <b>&lt;0.001*</b> | 0.012             | 0.029  |
|      |      | SCD  | 0.007  | 0.003  | 0.257             | -0.002            | 0.016  |
|      |      | aMCI | 0.009  | 0.003  | 0.066             | 0.000             | 0.018  |
|      | 13   | NC   | SCD    | -0.017 | 0.004             | <b>&lt;0.001*</b> | -0.027 |
| aMCI |      |      | -0.012 | 0.004  | <b>0.005</b>      | -0.022            | -0.003 |
| d-AD |      |      | -0.024 | 0.004  | <b>&lt;0.001*</b> | -0.034            | -0.013 |
| SCD  |      | NC   | 0.017  | 0.004  | <b>&lt;0.001*</b> | 0.007             | 0.027  |
|      |      | aMCI | 0.005  | 0.004  | 1.000             | -0.006            | 0.015  |
|      |      | d-AD | -0.007 | 0.004  | 0.607             | -0.018            | 0.004  |
| aMCI |      | NC   | 0.012  | 0.004  | <b>0.005</b>      | 0.003             | 0.022  |
|      |      | SCD  | -0.005 | 0.004  | 1.000             | -0.015            | 0.006  |
|      |      | d-AD | -0.012 | 0.004  | <b>0.030</b>      | -0.022            | -0.001 |
| d-AD |      | NC   | 0.024  | 0.004  | <b>&lt;0.001*</b> | 0.013             | 0.034  |
|      |      | SCD  | 0.007  | 0.004  | 0.607             | -0.004            | 0.018  |
|      |      | aMCI | 0.012  | 0.004  | <b>0.030</b>      | 0.001             | 0.022  |
| 14   | NC   | SCD  | -0.017 | 0.016  | 1.000             | -0.060            | 0.027  |
|      |      | aMCI | -0.012 | 0.016  | 1.000             | -0.054            | 0.030  |
|      |      | d-AD | 0.010  | 0.017  | 1.000             | -0.035            | 0.056  |
|      | SCD  | NC   | 0.017  | 0.016  | 1.000             | -0.027            | 0.060  |
|      |      | aMCI | 0.005  | 0.017  | 1.000             | -0.041            | 0.051  |
|      |      | d-AD | 0.027  | 0.018  | 0.856             | -0.022            | 0.076  |
|      | aMCI | NC   | 0.012  | 0.016  | 1.000             | -0.030            | 0.054  |
|      |      | SCD  | -0.005 | 0.017  | 1.000             | -0.051            | 0.041  |
|      |      | d-AD | 0.022  | 0.018  | 1.000             | -0.026            | 0.070  |
|      | d-AD | NC   | -0.010 | 0.017  | 1.000             | -0.056            | 0.035  |
|      |      | SCD  | -0.027 | 0.018  | 0.856             | -0.076            | 0.022  |
|      |      | aMCI | -0.022 | 0.018  | 1.000             | -0.070            | 0.026  |
| 15   | NC   | SCD  | -0.020 | 0.030  | 1.000             | -0.101            | 0.061  |
|      |      | aMCI | -0.021 | 0.029  | 1.000             | -0.099            | 0.058  |
|      |      | d-AD | 0.095  | 0.032  | <b>0.019</b>      | 0.010             | 0.180  |
|      | SCD  | NC   | 0.020  | 0.030  | 1.000             | -0.061            | 0.101  |
|      |      | aMCI | -0.001 | 0.032  | 1.000             | -0.086            | 0.085  |
|      |      | d-AD | 0.115  | 0.034  | <b>0.006</b>      | 0.024             | 0.206  |
|      | aMCI | NC   | 0.021  | 0.029  | 1.000             | -0.058            | 0.099  |
|      |      | SCD  | 0.001  | 0.032  | 1.000             | -0.085            | 0.086  |
|      |      | d-AD | 0.116  | 0.033  | <b>0.004</b>      | 0.027             | 0.205  |
|      | d-AD | NC   | -0.095 | 0.032  | <b>0.019</b>      | -0.180            | -0.010 |
|      |      | SCD  | -0.115 | 0.034  | <b>0.006</b>      | -0.206            | -0.024 |
|      |      | aMCI | -0.116 | 0.033  | <b>0.004</b>      | -0.205            | -0.027 |

---

|    |      |      |        |       |                   |        |        |
|----|------|------|--------|-------|-------------------|--------|--------|
|    |      | SCD  | -0.003 | 0.046 | 1.000             | -0.127 | 0.121  |
|    | NC   | aMCI | -0.004 | 0.045 | 1.000             | -0.124 | 0.116  |
|    |      | d-AD | 0.199  | 0.049 | <b>&lt;0.001*</b> | 0.069  | 0.328  |
|    |      | NC   | 0.003  | 0.046 | 1.000             | -0.121 | 0.127  |
|    | SCD  | aMCI | -0.001 | 0.049 | 1.000             | -0.132 | 0.129  |
|    |      | d-AD | 0.202  | 0.052 | <b>0.001</b>      | 0.062  | 0.341  |
| 16 |      | NC   | 0.004  | 0.045 | 1.000             | -0.116 | 0.124  |
|    | aMCI | SCD  | 0.001  | 0.049 | 1.000             | -0.129 | 0.132  |
|    |      | d-AD | 0.203  | 0.051 | <b>0.001</b>      | 0.067  | 0.339  |
|    |      | NC   | -0.199 | 0.049 | <b>&lt;0.001*</b> | -0.328 | -0.069 |
|    | d-AD | SCD  | -0.202 | 0.052 | <b>0.001</b>      | -0.341 | -0.062 |
|    |      | aMCI | -0.203 | 0.051 | <b>0.001</b>      | -0.339 | -0.067 |

---



---

Table S19. Rich club, feeder and local connectivity strength for age-matched dataset.

| ANOVA                           | F      | p <sup>a</sup> | Es <sup>b</sup> |
|---------------------------------|--------|----------------|-----------------|
| Rich Club Connectivity Strength | 10.848 | <0.001         | 0.153           |
| Feeder Connectivity Strength    | 55.035 | <0.001         | 0.478           |
| Local Connectivity Strength     | 96.976 | <0.001         | 0.618           |

<sup>a</sup> Values from ANOVA.

<sup>b</sup> Effect size;  $\eta^2$  for rich club, feeder and local connectivity strength.

Table S20. Post hoc testing on rich club, feeder and local connectivity strength from ANOVA for age-matched dataset (Bonferroni-corrected for groups).

| ANOVA                                 | (I)<br>Group | (J)<br>Group | Mean<br>Difference<br>(I-J) | SE    | P                 | 95% Confidence<br>Interval for Difference |                |
|---------------------------------------|--------------|--------------|-----------------------------|-------|-------------------|-------------------------------------------|----------------|
|                                       |              |              |                             |       |                   | Lower<br>Bound                            | Upper<br>Bound |
| Rich Club<br>Connectivity<br>Strength | NC           | SCD          | 0.777                       | 0.393 | 0.296             | -0.271                                    | 1.825          |
|                                       |              | aMCI         | 1.506                       | 0.380 | <b>0.001</b>      | 0.491                                     | 2.521          |
|                                       |              | d-AD         | 2.180                       | 0.412 | <b>&lt;0.001*</b> | 1.082                                     | 3.278          |
|                                       | SCD          | NC           | -0.777                      | 0.393 | 0.296             | -1.825                                    | 0.271          |
|                                       |              | aMCI         | 0.729                       | 0.413 | 0.476             | -0.373                                    | 1.831          |
|                                       |              | d-AD         | 1.403                       | 0.442 | <b>0.011</b>      | 0.224                                     | 2.582          |
|                                       | aMCI         | NC           | -1.506                      | 0.380 | <b>0.001</b>      | -2.521                                    | -0.491         |
|                                       |              | SCD          | -0.729                      | 0.413 | 0.476             | -1.831                                    | 0.373          |
|                                       |              | d-AD         | 0.674                       | 0.431 | 0.719             | -0.476                                    | 1.823          |
|                                       | d-AD         | NC           | -2.180                      | 0.412 | <b>&lt;0.001*</b> | -3.278                                    | -1.082         |
|                                       |              | SCD          | -1.403                      | 0.442 | <b>0.011</b>      | -2.582                                    | -0.224         |
|                                       |              | aMCI         | -0.674                      | 0.431 | 0.719             | -1.823                                    | 0.476          |
| Feeder<br>Connectivity<br>Strength    | NC           | SCD          | 10.164                      | 1.569 | <b>&lt;0.001*</b> | 5.978                                     | 14.350         |
|                                       |              | aMCI         | 12.632                      | 1.520 | <b>&lt;0.001*</b> | 8.578                                     | 16.686         |
|                                       |              | d-d-AD       | 20.263                      | 1.644 | <b>&lt;0.001*</b> | 15.877                                    | 24.648         |
|                                       | SCD          | NC           | -10.164                     | 1.569 | <b>&lt;0.001*</b> | -14.350                                   | -5.978         |
|                                       |              | aMCI         | 2.468                       | 1.650 | 0.819             | -1.935                                    | 6.871          |
|                                       |              | d-d-AD       | 10.099                      | 1.765 | <b>&lt;0.001*</b> | 5.389                                     | 14.808         |
|                                       | aMCI         | NC           | -12.632                     | 1.520 | <b>&lt;0.001*</b> | -16.686                                   | -8.578         |
|                                       |              | SCD          | -2.468                      | 1.650 | 0.819             | -6.871                                    | 1.935          |
|                                       |              | d-AD         | 7.631                       | 1.721 | <b>&lt;0.001*</b> | 3.038                                     | 12.223         |
|                                       | d-AD         | NC           | -20.263                     | 1.644 | <b>&lt;0.001*</b> | -24.648                                   | -15.877        |
|                                       |              | SCD          | -10.099                     | 1.765 | <b>&lt;0.001*</b> | -14.808                                   | -5.389         |
|                                       |              | aMCI         | -7.631                      | 1.721 | <b>&lt;0.001*</b> | -12.223                                   | -3.038         |
| Local<br>Connectivity<br>Strength     | NC           | SCD          | 22.202                      | 2.461 | <b>&lt;0.001*</b> | 15.637                                    | 28.767         |
|                                       |              | aMCI         | 27.368                      | 2.383 | <b>&lt;0.001*</b> | 21.010                                    | 33.726         |
|                                       |              | d-AD         | 41.655                      | 2.578 | <b>&lt;0.001*</b> | 34.777                                    | 48.532         |
|                                       | SCD          | NC           | -22.202                     | 2.461 | <b>&lt;0.001*</b> | -28.767                                   | -15.637        |
|                                       |              | aMCI         | 5.165                       | 2.588 | 0.285             | -1.739                                    | 12.070         |
|                                       |              | d-AD         | 19.452                      | 2.769 | <b>&lt;0.001*</b> | 12.067                                    | 26.838         |
|                                       | aMCI         | NC           | -27.368                     | 2.383 | <b>&lt;0.001*</b> | -33.726                                   | -21.010        |
|                                       |              | SCD          | -5.165                      | 2.588 | 0.285             | -12.070                                   | 1.739          |
|                                       |              | d-AD         | 14.287                      | 2.700 | <b>&lt;0.001*</b> | 7.085                                     | 21.489         |
|                                       | d-AD         | NC           | -41.655                     | 2.578 | <b>&lt;0.001*</b> | -48.532                                   | -34.777        |
|                                       |              | SCD          | -19.452                     | 2.769 | <b>&lt;0.001*</b> | -26.838                                   | -12.067        |
|                                       |              | aMCI         | -14.287                     | 2.700 | <b>&lt;0.001*</b> | -21.489                                   | -7.085         |

---

Table S21. Network topological metrics for age-matched dataset.

| ANOVA                                 | F      | p <sup>a</sup> | Es <sup>b</sup> |
|---------------------------------------|--------|----------------|-----------------|
| Strength                              | 88.561 | <0.001         | 0.596           |
| Clustering Coefficient                | 11.586 | <0.001         | 0.162           |
| Normalized Clustering Coefficient     | 34.436 | <0.001         | 0.365           |
| Characteristic Path Length            | 39.791 | <0.001         | 0.399           |
| Normalized Characteristic Path Length | 4.365  | 0.005          | 0.068           |

<sup>a</sup> Values from ANOVA.

<sup>b</sup> Effect size;  $\eta^2$  for network topological metrics.

Table S22. Post hoc testing on network topological metrics from ANOVA for age-matched dataset (Bonferroni-corrected for groups).

| ANOVA                                   | (I)<br>Group | (J)<br>Group | Mean<br>Difference<br>(I-J) | SE    | P                | 95% Confidence<br>Interval for Difference |                |
|-----------------------------------------|--------------|--------------|-----------------------------|-------|------------------|-------------------------------------------|----------------|
|                                         |              |              |                             |       |                  | Lower<br>Bound                            | Upper<br>Bound |
| Strength                                | NC           | SCD          | 0.737                       | 0.088 | < <b>0.001</b> * | 0.503                                     | 0.970          |
|                                         |              | aMCI         | 0.922                       | 0.085 | < <b>0.001</b> * | 0.696                                     | 1.149          |
|                                         |              | d-AD         | 1.424                       | 0.092 | < <b>0.001</b> * | 1.179                                     | 1.669          |
|                                         | SCD          | NC           | -0.737                      | 0.088 | < <b>0.001</b> * | -0.970                                    | -0.503         |
|                                         |              | aMCI         | 0.186                       | 0.092 | 0.272            | -0.060                                    | 0.432          |
|                                         |              | d-AD         | 0.688                       | 0.099 | < <b>0.001</b> * | 0.425                                     | 0.951          |
|                                         | aMCI         | NC           | -0.922                      | 0.085 | < <b>0.001</b> * | -1.149                                    | -0.696         |
|                                         |              | SCD          | -0.186                      | 0.092 | 0.272            | -0.432                                    | 0.060          |
|                                         |              | d-AD         | 0.502                       | 0.096 | < <b>0.001</b> * | 0.245                                     | 0.759          |
|                                         | d-AD         | NC           | -1.424                      | 0.092 | < <b>0.001</b> * | -1.669                                    | -1.179         |
|                                         |              | SCD          | -0.688                      | 0.099 | < <b>0.001</b> * | -0.951                                    | -0.425         |
|                                         |              | aMCI         | -0.502                      | 0.096 | < <b>0.001</b> * | -0.759                                    | -0.245         |
| Clustering<br>Coefficient               | NC           | SCD          | 0.015                       | 0.005 | <b>0.014</b>     | 0.002                                     | 0.027          |
|                                         |              | aMCI         | 0.016                       | 0.005 | <b>0.005</b>     | 0.003                                     | 0.028          |
|                                         |              | d-AD         | 0.028                       | 0.005 | < <b>0.001</b> * | 0.015                                     | 0.042          |
|                                         | SCD          | NC           | -0.015                      | 0.005 | <b>0.014</b>     | -0.027                                    | -0.002         |
|                                         |              | aMCI         | 0.001                       | 0.005 | 1.000            | -0.012                                    | 0.014          |
|                                         |              | d-AD         | 0.014                       | 0.005 | 0.057            | 0.000                                     | 0.028          |
|                                         | aMCI         | NC           | -0.016                      | 0.005 | <b>0.005</b>     | -0.028                                    | -0.003         |
|                                         |              | SCD          | -0.001                      | 0.005 | 1.000            | -0.014                                    | 0.012          |
|                                         |              | d-AD         | 0.013                       | 0.005 | 0.086            | -0.001                                    | 0.027          |
|                                         | d-AD         | NC           | -0.028                      | 0.005 | < <b>0.001</b> * | -0.042                                    | -0.015         |
|                                         |              | SCD          | -0.014                      | 0.005 | 0.057            | -0.028                                    | 0.000          |
|                                         |              | aMCI         | -0.013                      | 0.005 | 0.086            | -0.027                                    | 0.001          |
| Normalized<br>Clustering<br>Coefficient | NC           | SCD          | -0.181                      | 0.033 | < <b>0.001</b> * | -0.270                                    | -0.092         |
|                                         |              | aMCI         | -0.148                      | 0.032 | < <b>0.001</b> * | -0.234                                    | -0.062         |
|                                         |              | d-AD         | -0.352                      | 0.035 | < <b>0.001</b> * | -0.446                                    | -0.259         |
|                                         | SCD          | NC           | 0.181                       | 0.033 | < <b>0.001</b> * | 0.092                                     | 0.270          |
|                                         |              | aMCI         | 0.033                       | 0.035 | 1.000            | -0.061                                    | 0.127          |
|                                         |              | d-AD         | -0.171                      | 0.038 | < <b>0.001</b> * | -0.272                                    | -0.071         |
|                                         | aMCI         | NC           | 0.148                       | 0.032 | < <b>0.001</b> * | 0.062                                     | 0.234          |
|                                         |              | SCD          | -0.033                      | 0.035 | 1.000            | -0.127                                    | 0.061          |
|                                         |              | d-AD         | -0.204                      | 0.037 | < <b>0.001</b> * | -0.302                                    | -0.106         |
|                                         | d-AD         | NC           | 0.352                       | 0.035 | < <b>0.001</b> * | 0.259                                     | 0.446          |
|                                         |              | SCD          | 0.171                       | 0.038 | < <b>0.001</b> * | 0.071                                     | 0.272          |
|                                         |              | aMCI         | 0.204                       | 0.037 | < <b>0.001</b> * | 0.106                                     | 0.302          |
| Characteristic<br>Path Length           | NC           | SCD          | -0.380                      | 0.072 | < <b>0.001</b> * | -0.572                                    | -0.187         |
|                                         |              | aMCI         | -0.465                      | 0.070 | < <b>0.001</b> * | -0.652                                    | -0.279         |
|                                         |              | d-AD         | -0.803                      | 0.076 | < <b>0.001</b> * | -1.005                                    | -0.601         |

|                |      |      |        |       |                  |        |        |
|----------------|------|------|--------|-------|------------------|--------|--------|
|                |      | NC   | 0.380  | 0.072 | < <b>0.001</b> * | 0.187  | 0.572  |
|                | SCD  | aMCI | -0.085 | 0.076 | 1.000            | -0.288 | 0.117  |
|                |      | d-AD | -0.423 | 0.081 | < <b>0.001</b> * | -0.640 | -0.207 |
|                |      | NC   | 0.465  | 0.070 | < <b>0.001</b> * | 0.279  | 0.652  |
|                | aMCI | SCD  | 0.085  | 0.076 | 1.000            | -0.117 | 0.288  |
|                |      | d-AD | -0.338 | 0.079 | < <b>0.001</b> * | -0.549 | -0.127 |
|                |      | NC   | 0.803  | 0.076 | < <b>0.001</b> * | 0.601  | 1.005  |
|                | d-AD | SCD  | 0.423  | 0.081 | < <b>0.001</b> * | 0.207  | 0.640  |
|                |      | aMCI | 0.338  | 0.079 | < <b>0.001</b> * | 0.127  | 0.549  |
|                |      | SCD  | -0.007 | 0.003 | <b>0.042</b>     | -0.014 | 0.000  |
|                | NC   | aMCI | -0.001 | 0.002 | 1.000            | -0.008 | 0.005  |
|                |      | d-AD | -0.008 | 0.003 | <b>0.024</b>     | -0.015 | -0.001 |
|                |      | NC   | 0.007  | 0.003 | <b>0.042</b>     | 0.000  | 0.014  |
| Normalized     | SCD  | aMCI | 0.005  | 0.003 | 0.238            | -0.002 | 0.013  |
| Characteristic |      | d-AD | -0.001 | 0.003 | 1.000            | -0.008 | 0.007  |
|                |      | NC   | 0.001  | 0.002 | 1.000            | -0.005 | 0.008  |
| Path Length    | aMCI | SCD  | -0.005 | 0.003 | 0.238            | -0.013 | 0.002  |
|                |      | d-AD | -0.006 | 0.003 | 0.143            | -0.014 | 0.001  |
|                |      | NC   | 0.008  | 0.003 | <b>0.024</b>     | 0.001  | 0.015  |
|                | d-AD | SCD  | 0.001  | 0.003 | 1.000            | -0.007 | 0.008  |
|                |      | aMCI | 0.006  | 0.003 | 0.143            | -0.001 | 0.014  |

Table S23. Partial Pearson’s correlations between normalized rich club coefficients and clinical performance for age-matched dataset. Partial Pearson’s correlations controlled for education were used to assess how normalized rich club coefficients related to clinical performance in each group. The bold numbers represent significant correlations at  $P<0.05$ . The star-labeled numbers represent significant correlations at  $P<0.05$  after Bonferroni corrections for the number of cognitive test variables (AVLT-immediate recall, AVLT-delayed recall, AVLT-recognition, MMSE and MoCA).

| COV: Education |                  | k                   | 2            | 3             | 4            | 5            | 6             | 7            | 8            | 9            | 10           | 11           | 12           | 13           | 14           | 15           | 16     |       |
|----------------|------------------|---------------------|--------------|---------------|--------------|--------------|---------------|--------------|--------------|--------------|--------------|--------------|--------------|--------------|--------------|--------------|--------|-------|
| DF=49          | AVLT-Immediate   | r                   | -0.172       | -0.242        | -0.140       | 0.039        | 0.075         | 0.190        | 0.141        | 0.085        | 0.020        | 0.091        | 0.069        | 0.102        | 0.014        | -0.001       | 0.038  |       |
|                |                  | p                   | 0.114        | <b>0.043</b>  | 0.163        | 0.392        | 0.299         | 0.091        | 0.162        | 0.277        | 0.444        | 0.263        | 0.315        | 0.238        | 0.462        | 0.498        | 0.396  |       |
|                | AVLT-Delayed     | r                   | -0.011       | -0.342        | -0.319       | 0.002        | -0.061        | 0.107        | 0.017        | -0.044       | -0.061       | -0.014       | 0.014        | 0.004        | -0.107       | -0.097       | -0.116 |       |
|                |                  | p                   | 0.469        | <b>0.007*</b> | <b>0.011</b> | 0.494        | 0.334         | 0.228        | 0.453        | 0.381        | 0.334        | 0.461        | 0.461        | 0.489        | 0.227        | 0.249        | 0.210  |       |
|                | NC Recognition   | r                   | 0.111        | -0.054        | -0.100       | 0.150        | 0.129         | 0.242        | 0.174        | 0.103        | 0.059        | 0.019        | -0.009       | -0.150       | -0.231       | -0.131       | -0.161 |       |
|                |                  | p                   | 0.219        | 0.354         | 0.242        | 0.146        | 0.184         | <b>0.043</b> | 0.111        | 0.236        | 0.339        | 0.448        | 0.476        | 0.147        | 0.051        | 0.180        | 0.129  |       |
|                | MMSE             | r                   | 0.110        | -0.034        | 0.038        | 0.033        | 0.107         | 0.152        | 0.018        | -0.097       | -0.105       | -0.068       | -0.078       | 0.072        | -0.005       | -0.019       | -0.112 |       |
|                |                  | p                   | 0.221        | 0.406         | 0.395        | 0.409        | 0.227         | 0.143        | 0.451        | 0.249        | 0.231        | 0.317        | 0.292        | 0.307        | 0.486        | 0.446        | 0.216  |       |
|                | MoCA             | r                   | 0.026        | -0.178        | -0.055       | -0.015       | -0.090        | -0.042       | -0.090       | -0.066       | -0.073       | -0.025       | -0.117       | 0.006        | -0.066       | -0.053       | -0.143 |       |
|                |                  | p                   | 0.427        | 0.106         | 0.352        | 0.457        | 0.265         | 0.384        | 0.265        | 0.322        | 0.305        | 0.432        | 0.207        | 0.482        | 0.322        | 0.356        | 0.158  |       |
|                | DF=36            | AVLT-Immediate      | r            | -0.133        | 0.027        | 0.061        | 0.026         | -0.086       | -0.022       | -0.080       | -0.073       | -0.134       | -0.125       | 0.019        | 0.016        | -0.034       | -0.055 | 0.101 |
|                |                  |                     | p            | 0.213         | 0.436        | 0.358        | 0.439         | 0.303        | 0.448        | 0.316        | 0.331        | 0.211        | 0.228        | 0.456        | 0.463        | 0.421        | 0.371  | 0.272 |
|                |                  | AVLT-Delayed        | r            | 0.013         | -0.119       | -0.181       | -0.172        | -0.298       | -0.305       | -0.296       | -0.164       | -0.294       | -0.284       | -0.072       | -0.057       | 0.030        | -0.049 | 0.122 |
|                |                  |                     | p            | 0.469         | 0.239        | 0.138        | 0.152         | <b>0.035</b> | <b>0.031</b> | <b>0.036</b> | 0.163        | <b>0.037</b> | <b>0.042</b> | 0.334        | 0.367        | 0.430        | 0.384  | 0.233 |
| NC Recognition |                  | r                   | 0.073        | 0.163         | -0.007       | -0.117       | -0.112        | -0.139       | -0.162       | -0.171       | -0.222       | -0.184       | -0.200       | -0.313       | -0.297       | -0.298       | -0.186 |       |
|                |                  | p                   | 0.332        | 0.164         | 0.482        | 0.242        | 0.251         | 0.203        | 0.165        | 0.152        | 0.091        | 0.134        | 0.114        | <b>0.028</b> | <b>0.035</b> | <b>0.034</b> | 0.132  |       |
| MMSE           |                  | r                   | -0.057       | -0.089        | -0.161       | -0.135       | -0.191        | -0.245       | -0.186       | -0.156       | -0.312       | -0.349       | -0.190       | -0.217       | -0.254       | -0.372       | 0.008  |       |
|                |                  | p                   | 0.366        | 0.298         | 0.167        | 0.210        | 0.126         | 0.069        | 0.132        | 0.175        | <b>0.028</b> | <b>0.016</b> | 0.127        | 0.095        | 0.062        | <b>0.011</b> | 0.480  |       |
| MoCA           |                  | r                   | 0.051        | 0.134         | 0.034        | 0.045        | 0.070         | -0.036       | -0.058       | -0.045       | 0.010        | -0.143       | -0.058       | -0.141       | -0.175       | -0.227       | 0.082  |       |
|                |                  | p                   | 0.380        | 0.212         | 0.419        | 0.393        | 0.338         | 0.415        | 0.364        | 0.395        | 0.476        | 0.196        | 0.365        | 0.200        | 0.147        | 0.085        | 0.312  |       |
| DF=42          |                  | AVLT-Immediate      | r            | -0.032        | 0.022        | -0.223       | -0.240        | -0.193       | -0.061       | -0.072       | -0.185       | -0.181       | -0.266       | -0.203       | -0.118       | -0.091       | -0.144 | 0.021 |
|                |                  |                     | p            | 0.419         | 0.443        | 0.073        | 0.058         | 0.105        | 0.348        | 0.320        | 0.115        | 0.119        | <b>0.040</b> | 0.093        | 0.223        | 0.279        | 0.175  | 0.446 |
|                |                  | AVLT-Delayed        | r            | -0.001        | -0.029       | -0.191       | -0.286        | -0.216       | -0.247       | -0.124       | -0.113       | -0.144       | -0.228       | -0.111       | 0.096        | 0.084        | -0.076 | 0.219 |
|                |                  |                     | p            | 0.497         | 0.427        | 0.107        | <b>0.030</b>  | 0.080        | 0.053        | 0.211        | 0.232        | 0.176        | 0.068        | 0.236        | 0.268        | 0.293        | 0.311  | 0.076 |
|                | aMCI Recognition | r                   | -0.072       | -0.220        | -0.063       | -0.159       | -0.194        | -0.254       | -0.025       | 0.011        | 0.015        | -0.089       | 0.105        | 0.137        | 0.127        | -0.148       | 0.033  |       |
|                |                  | p                   | 0.321        | 0.076         | 0.343        | 0.151        | 0.104         | 0.048        | 0.435        | 0.471        | 0.461        | 0.283        | 0.249        | 0.187        | 0.206        | 0.168        | 0.416  |       |
|                | MMSE             | r                   | 0.048        | -0.209        | -0.151       | -0.238       | -0.286        | -0.243       | -0.193       | -0.086       | -0.153       | -0.215       | -0.038       | -0.029       | -0.173       | -0.192       | 0.007  |       |
|                |                  | p                   | 0.379        | 0.087         | 0.164        | 0.060        | <b>0.030</b>  | 0.056        | 0.105        | 0.290        | 0.160        | 0.081        | 0.404        | 0.426        | 0.130        | 0.106        | 0.482  |       |
|                | MoCA             | r                   | 0.042        | -0.259        | -0.215       | -0.289       | -0.277        | -0.250       | -0.174       | -0.121       | -0.248       | -0.264       | -0.039       | 0.090        | -0.021       | -0.011       | 0.140  |       |
|                |                  | p                   | 0.393        | <b>0.045</b>  | 0.080        | <b>0.029</b> | <b>0.034</b>  | 0.051        | 0.130        | 0.217        | 0.052        | <b>0.042</b> | 0.400        | 0.281        | 0.447        | 0.473        | 0.183  |       |
|                | DF=28            | d-AD AVLT-Immediate | r            | -0.041        | 0.170        | -0.126       | -0.036        | -0.191       | -0.184       | -0.123       | 0.056        | 0.064        | 0.131        | -0.032       | -0.171       | -0.054       | -0.077 | 0.097 |
|                |                  |                     | p            | 0.415         | 0.185        | 0.254        | 0.425         | 0.156        | 0.165        | 0.259        | 0.385        | 0.369        | 0.245        | 0.434        | 0.182        | 0.389        | 0.343  | 0.305 |
|                |                  | AVLT-Delayed        | r            | -0.422        | -0.222       | -0.223       | -0.052        | -0.136       | -0.169       | -0.152       | -0.126       | -0.069       | 0.083        | -0.071       | -0.034       | 0.134        | -0.013 | 0.140 |
|                |                  |                     | p            | <b>0.010*</b> | 0.119        | 0.119        | 0.392         | 0.237        | 0.187        | 0.211        | 0.254        | 0.358        | 0.331        | 0.354        | 0.430        | 0.239        | 0.474  | 0.230 |
| NC Recognition |                  | r                   | -0.447       | -0.169        | -0.266       | -0.407       | -0.429        | -0.389       | -0.304       | -0.209       | -0.178       | -0.244       | -0.260       | -0.288       | -0.100       | 0.041        | 0.201  |       |
|                |                  | p                   | <b>0.007</b> | 0.186         | 0.078        | <b>0.013</b> | <b>0.008*</b> | <b>0.017</b> | 0.051        | 0.133        | 0.173        | 0.097        | 0.083        | 0.062        | 0.300        | 0.415        | 0.144  |       |

---

|      |   |        |       |        |        |        |        |        |        |        |        |        |        |        |        |        |
|------|---|--------|-------|--------|--------|--------|--------|--------|--------|--------|--------|--------|--------|--------|--------|--------|
| MMSE | r | -0.043 | 0.086 | -0.114 | -0.095 | -0.214 | -0.247 | -0.258 | -0.079 | -0.149 | -0.241 | -0.240 | -0.409 | -0.055 | -0.041 | 0.024  |
|      | p | 0.411  | 0.325 | 0.274  | 0.309  | 0.128  | 0.094  | 0.084  | 0.339  | 0.216  | 0.100  | 0.101  | 0.012  | 0.387  | 0.415  | 0.450  |
| MoCA | r | -0.116 | 0.041 | -0.064 | -0.073 | -0.187 | -0.219 | -0.224 | -0.060 | -0.128 | -0.245 | -0.234 | -0.337 | -0.071 | -0.033 | -0.012 |
|      | p | 0.271  | 0.415 | 0.368  | 0.351  | 0.161  | 0.122  | 0.117  | 0.376  | 0.250  | 0.096  | 0.106  | 0.034  | 0.356  | 0.431  | 0.475  |

---

Table S24. Partial Pearson’s correlations between rich club coefficients and clinical performance for age-matched dataset. Partial Pearson’s correlations controlled for education were used to assess how rich club coefficients related to clinical performance in each group. The bold numbers represent significant correlations at  $P<0.05$ . The star-labeled numbers represent significant correlations at  $P<0.05$  after Bonferroni corrections for the number of cognitive test variables (AVLT-immediate recall, AVLT-delayed recall, AVLT-recognition, MMSE and MoCA).

| COV: Education | k                | 2 | 3             | 4             | 5            | 6             | 7            | 8            | 9      | 10           | 11           | 12     | 13            | 14            | 15            | 16            |               |
|----------------|------------------|---|---------------|---------------|--------------|---------------|--------------|--------------|--------|--------------|--------------|--------|---------------|---------------|---------------|---------------|---------------|
| NC<br>DF=49    | AVLT-Immediate   | r | 0.131         | 0.126         | 0.120        | -0.088        | 0.086        | -0.055       | -0.005 | 0.040        | -0.046       | -0.031 | 0.054         | 0.066         | 0.047         | 0.104         | 0.170         |
|                | Recall Scores    | p | 0.179         | 0.189         | 0.201        | 0.269         | 0.274        | 0.352        | 0.487  | 0.391        | 0.374        | 0.415  | 0.354         | 0.323         | 0.373         | 0.234         | 0.117         |
|                | AVLT-Delayed     | r | 0.246         | 0.053         | 0.027        | -0.031        | -0.057       | -0.147       | -0.086 | 0.058        | -0.037       | 0.059  | 0.065         | 0.054         | 0.028         | 0.089         | 0.128         |
|                | Recall Scores    | p | <b>0.041</b>  | 0.356         | 0.427        | 0.414         | 0.345        | 0.151        | 0.275  | 0.343        | 0.398        | 0.341  | 0.325         | 0.353         | 0.422         | 0.267         | 0.185         |
|                | AVLT-Recognition | r | 0.301         | 0.095         | 0.051        | 0.014         | 0.022        | -0.061       | 0.018  | 0.222        | 0.197        | 0.173  | 0.123         | 0.069         | 0.045         | 0.132         | 0.112         |
|                | Scores           | p | <b>0.016</b>  | 0.254         | 0.361        | 0.462         | 0.438        | 0.334        | 0.449  | 0.059        | 0.083        | 0.112  | 0.195         | 0.316         | 0.376         | 0.178         | 0.217         |
|                | MMSE             | r | 0.078         | 0.074         | 0.145        | 0.179         | 0.121        | 0.029        | 0.017  | 0.093        | 0.183        | 0.117  | 0.047         | 0.176         | 0.194         | 0.218         | 0.140         |
|                |                  | p | 0.293         | 0.304         | 0.155        | 0.105         | 0.200        | 0.420        | 0.454  | 0.259        | 0.099        | 0.207  | 0.371         | 0.108         | 0.087         | 0.062         | 0.164         |
|                | MoCA             | r | -0.025        | 0.053         | 0.176        | 0.219         | 0.322        | 0.297        | 0.230  | 0.259        | 0.275        | 0.172  | 0.098         | 0.191         | 0.215         | 0.175         | 0.102         |
|                |                  | p | 0.432         | 0.356         | 0.108        | 0.062         | <b>0.011</b> | <b>0.017</b> | 0.052  | <b>0.033</b> | <b>0.025</b> | 0.114  | 0.247         | 0.090         | 0.065         | 0.109         | 0.237         |
| SCD<br>DF=36   | AVLT-Immediate   | r | 0.203         | 0.156         | 0.217        | 0.237         | 0.176        | 0.166        | 0.036  | 0.064        | -0.019       | -0.145 | 0.000         | 0.097         | 0.056         | 0.112         | 0.086         |
|                | Recall Scores    | p | 0.111         | 0.175         | 0.095        | 0.076         | 0.145        | 0.160        | 0.415  | 0.351        | 0.454        | 0.193  | 0.499         | 0.281         | 0.368         | 0.251         | 0.305         |
|                | AVLT-Delayed     | r | 0.247         | 0.225         | 0.233        | 0.375         | 0.334        | 0.347        | 0.238  | 0.274        | 0.183        | 0.164  | 0.299         | 0.284         | 0.306         | 0.296         | 0.365         |
|                | Recall Scores    | p | 0.067         | 0.087         | 0.080        | <b>0.010*</b> | <b>0.020</b> | <b>0.016</b> | 0.075  | <b>0.048</b> | 0.135        | 0.163  | <b>0.034</b>  | <b>0.042</b>  | <b>0.031</b>  | <b>0.036</b>  | <b>0.012</b>  |
|                | AVLT-Recognition | r | 0.081         | 0.098         | -0.049       | -0.067        | -0.108       | -0.117       | -0.277 | -0.132       | -0.043       | -0.095 | -0.052        | -0.108        | -0.105        | -0.033        | 0.031         |
|                | Scores           | p | 0.315         | 0.279         | 0.385        | 0.345         | 0.260        | 0.241        | 0.046  | 0.215        | 0.398        | 0.286  | 0.379         | 0.259         | 0.266         | 0.423         | 0.427         |
|                | MMSE             | r | 0.097         | -0.001        | -0.009       | 0.108         | 0.069        | 0.094        | 0.063  | 0.021        | 0.041        | 0.008  | 0.093         | 0.136         | 0.072         | 0.029         | 0.173         |
|                |                  | p | 0.281         | 0.498         | 0.479        | 0.259         | 0.339        | 0.288        | 0.354  | 0.450        | 0.403        | 0.481  | 0.289         | 0.208         | 0.335         | 0.432         | 0.149         |
|                | MoCA             | r | -0.045        | 0.104         | 0.079        | -0.050        | -0.130       | -0.071       | 0.011  | 0.082        | 0.193        | 0.085  | 0.118         | 0.077         | 0.080         | 0.086         | 0.269         |
|                |                  | p | 0.395         | 0.268         | 0.319        | 0.382         | 0.218        | 0.336        | 0.474  | 0.312        | 0.122        | 0.307  | 0.239         | 0.322         | 0.316         | 0.304         | 0.051         |
| aMCI<br>DF=42  | AVLT-Immediate   | r | 0.222         | 0.363         | 0.044        | 0.002         | -0.145       | -0.217       | -0.152 | -0.078       | 0.066        | 0.063  | 0.118         | 0.128         | 0.114         | 0.135         |               |
|                | Recall Scores    | p | 0.074         | <b>0.007*</b> | 0.389        | 0.495         | 0.175        | 0.078        | 0.162  | 0.307        | 0.335        | 0.343  | 0.222         | 0.216         | 0.203         | 0.231         | 0.191         |
|                | AVLT-Delayed     | r | 0.157         | 0.332         | 0.225        | 0.154         | 0.185        | 0.008        | 0.002  | 0.065        | 0.198        | 0.251  | 0.390         | 0.436         | 0.387         | 0.386         | 0.422         |
|                | Recall Scores    | p | 0.155         | <b>0.014</b>  | 0.071        | 0.159         | 0.114        | 0.480        | 0.494  | 0.337        | 0.099        | 0.050  | <b>0.004*</b> | <b>0.002*</b> | <b>0.004*</b> | <b>0.004*</b> | <b>0.002*</b> |
|                | AVLT-Recognition | r | -0.029        | -0.002        | 0.103        | -0.034        | 0.077        | -0.031       | -0.054 | -0.042       | 0.152        | 0.130  | 0.282         | 0.227         | 0.213         | 0.128         | 0.106         |
|                | Scores           | p | 0.427         | 0.495         | 0.254        | 0.414         | 0.309        | 0.422        | 0.363  | 0.393        | 0.162        | 0.199  | <b>0.032</b>  | 0.069         | 0.083         | 0.203         | 0.247         |
|                | MMSE             | r | 0.042         | 0.190         | 0.191        | -0.041        | -0.024       | -0.098       | -0.093 | -0.021       | 0.052        | 0.062  | 0.160         | 0.177         | 0.077         | 0.058         | 0.048         |
|                |                  | p | 0.393         | 0.108         | 0.107        | 0.396         | 0.438        | 0.264        | 0.274  | 0.446        | 0.368        | 0.345  | 0.149         | 0.126         | 0.309         | 0.354         | 0.377         |
|                | MoCA             | r | 0.181         | 0.371         | 0.204        | 0.002         | 0.059        | -0.042       | 0.084  | 0.024        | 0.046        | 0.152  | 0.242         | 0.245         | 0.193         | 0.169         | 0.208         |
|                |                  | p | 0.120         | <b>0.006*</b> | 0.092        | 0.495         | 0.352        | 0.393        | 0.295  | 0.439        | 0.385        | 0.162  | 0.057         | 0.054         | 0.104         | 0.136         | 0.087         |
| d-AD<br>DF=28  | AVLT-Immediate   | r | 0.533         | 0.230         | 0.090        | 0.115         | 0.064        | 0.108        | 0.269  | 0.314        | 0.246        | 0.119  | 0.078         | 0.032         | -0.001        | 0.062         | 0.062         |
|                | Recall Scores    | p | <b>0.001*</b> | 0.111         | 0.318        | 0.273         | 0.369        | 0.286        | 0.075  | 0.046        | 0.095        | 0.265  | 0.340         | 0.433         | 0.499         | 0.372         | 0.373         |
|                | AVLT-Delayed     | r | 0.374         | 0.302         | 0.153        | 0.122         | 0.043        | 0.217        | 0.285  | 0.362        | 0.256        | 0.167  | 0.058         | -0.005        | -0.034        | -0.059        | 0.071         |
|                | Recall Scores    | p | <b>0.021</b>  | 0.052         | 0.209        | 0.261         | 0.411        | 0.125        | 0.064  | <b>0.025</b> | 0.086        | 0.189  | 0.379         | 0.489         | 0.430         | 0.379         | 0.355         |
|                | AVLT-Recognition | r | 0.140         | 0.183         | 0.316        | 0.237         | 0.143        | 0.255        | 0.243  | 0.340        | 0.297        | 0.148  | 0.112         | 0.094         | 0.126         | 0.089         | 0.133         |
|                | Scores           | p | 0.230         | 0.167         | <b>0.044</b> | 0.104         | 0.226        | 0.087        | 0.098  | <b>0.033</b> | 0.056        | 0.217  | 0.278         | 0.311         | 0.253         | 0.321         | 0.243         |



---

|      |   |                |       |       |       |       |       |              |              |       |       |       |        |        |        |       |
|------|---|----------------|-------|-------|-------|-------|-------|--------------|--------------|-------|-------|-------|--------|--------|--------|-------|
| MMSE | r | 0.583          | 0.204 | 0.172 | 0.253 | 0.203 | 0.216 | 0.426        | 0.397        | 0.301 | 0.149 | 0.184 | 0.106  | 0.033  | 0.111  | 0.126 |
|      | p | < <b>0.001</b> | 0.140 | 0.182 | 0.089 | 0.141 | 0.125 | <b>0.009</b> | <b>0.015</b> | 0.053 | 0.217 | 0.165 | 0.289  | 0.431  | 0.280  | 0.253 |
| MoCA | r | 0.616          | 0.176 | 0.161 | 0.154 | 0.096 | 0.147 | 0.360        | 0.380        | 0.226 | 0.043 | 0.053 | -0.031 | -0.078 | -0.035 | 0.025 |
|      | p | < <b>0.001</b> | 0.175 | 0.198 | 0.209 | 0.306 | 0.219 | <b>0.025</b> | <b>0.019</b> | 0.115 | 0.412 | 0.391 | 0.436  | 0.340  | 0.427  | 0.447 |

---

Table S25. Partial Pearson’s correlations between rich club, feeder and local connectivity strength and clinical performance for age-matched dataset. Partial Pearson’s correlations controlled for education were used to assess how rich club, feeder and local connectivity strength related to clinical performance in each group. The bold numbers represent significant correlations at  $P<0.05$ . The star-labeled numbers represent significant correlations at  $P<0.05$  after Bonferroni corrections for the number of cognitive test variables (AVLT-immediate recall, AVLT-delayed recall, AVLT-recognition, MMSE and MoCA).

| COV: Education  |                         | Rich Club    | Feeder       | Local             |              |
|-----------------|-------------------------|--------------|--------------|-------------------|--------------|
|                 |                         | Connectivity | Connectivity | Connectivity      |              |
|                 |                         | Strength     | Strength     | Strength          |              |
| NC<br>(DF=49)   | AVLT-Immediate Recall   | r            | 0.105        | 0.194             | -0.040       |
|                 | Scores                  | p            | 0.232        | 0.086             | 0.391        |
|                 | AVLT-Delayed Recall     | r            | -0.148       | 0.120             | -0.045       |
|                 | Scores                  | p            | 0.150        | 0.201             | 0.377        |
|                 | AVLT-Recognition Scores | r            | -0.171       | 0.217             | 0.067        |
|                 |                         | p            | 0.115        | 0.063             | 0.321        |
|                 | MMSE                    | r            | 0.060        | 0.168             | 0.103        |
|                 | MoCA                    | p            | 0.338        | 0.119             | 0.235        |
|                 |                         | r            | -0.078       | 0.231             | 0.234        |
|                 |                         | p            | 0.293        | 0.051             | <b>0.049</b> |
| SCD<br>(DF=36)  | AVLT-Immediate Recall   | r            | 0.074        | 0.237             | 0.086        |
|                 | Scores                  | p            | 0.329        | 0.076             | 0.304        |
|                 | AVLT-Delayed Recall     | r            | 0.278        | 0.426             | 0.323        |
|                 | Scores                  | p            | <b>0.046</b> | <b>0.003*</b>     | <b>0.024</b> |
|                 | AVLT-Recognition Scores | r            | -0.079       | 0.128             | -0.054       |
|                 |                         | p            | 0.318        | 0.222             | 0.374        |
|                 | MMSE                    | r            | 0.038        | 0.216             | 0.100        |
|                 | MoCA                    | p            | 0.411        | 0.097             | 0.276        |
|                 |                         | r            | 0.162        | 0.064             | 0.056        |
|                 |                         | p            | 0.165        | 0.352             | 0.368        |
| aMCI<br>(DF=42) | AVLT-Immediate Recall   | r            | 0.065        | 0.255             | 0.096        |
|                 | Scores                  | p            | 0.338        | <b>0.048</b>      | 0.268        |
|                 | AVLT-Delayed Recall     | r            | 0.262        | 0.486             | 0.166        |
|                 | Scores                  | p            | <b>0.043</b> | <b>&lt;0.001*</b> | 0.140        |
|                 | AVLT-Recognition Scores | r            | 0.155        | 0.233             | 0.000        |
|                 |                         | p            | 0.158        | 0.064             | 0.500        |
|                 | MMSE                    | r            | 0.145        | 0.189             | 0.122        |
|                 | MoCA                    | p            | 0.173        | 0.110             | 0.216        |
|                 |                         | r            | 0.251        | 0.265             | 0.125        |
|                 |                         | p            | <b>0.050</b> | <b>0.041</b>      | 0.209        |
| d-AD<br>(DF=28) | AVLT-Immediate Recall   | r            | 0.105        | 0.032             | 0.073        |
|                 | Scores                  | p            | 0.290        | 0.434             | 0.350        |
|                 | AVLT-Delayed Recall     | r            | 0.061        | 0.033             | 0.140        |
|                 | Scores                  | p            | 0.375        | 0.432             | 0.230        |

---

|                         |   |        |              |              |
|-------------------------|---|--------|--------------|--------------|
| AVLT-Recognition Scores | r | 0.062  | 0.328        | 0.332        |
|                         | p | 0.372  | <b>0.038</b> | <b>0.037</b> |
| MMSE                    | r | -0.001 | 0.215        | 0.265        |
|                         | p | 0.498  | 0.127        | 0.079        |
| MoCA                    | r | -0.060 | 0.130        | 0.154        |
|                         | p | 0.376  | 0.247        | 0.209        |

---

Table S26. Partial Pearson’s correlations between network topological metrics and clinical performance for age-matched dataset. Partial Pearson’s correlations controlled for education were used to assess how network topological metrics related to clinical performance in each group. The bold numbers represent significant correlations at  $P<0.05$  without Bonferroni corrections. The star-labeled numbers represent significant correlations at  $P<0.05$  after Bonferroni corrections for the number of cognitive test variables (AVLT-immediate recall, AVLT-delayed recall, AVLT-recognition, MMSE and MoCA).

|               | COV: Education   |   | Strength      | Clustering Coefficient | Normalized Clustering Coefficient | Characteristic Path Length | Normalized Characteristic Path Length |
|---------------|------------------|---|---------------|------------------------|-----------------------------------|----------------------------|---------------------------------------|
| NC<br>DF=49   | AVLT-Immediate   | r | 0.061         | -0.031                 | -0.157                            | -0.059                     | 0.024                                 |
|               | Recall Scores    | p | 0.335         | 0.413                  | 0.135                             | 0.342                      | 0.433                                 |
|               | AVLT-Delayed     | r | 0.001         | 0.120                  | -0.046                            | 0.022                      | 0.124                                 |
|               | Recall Scores    | p | 0.498         | 0.200                  | 0.375                             | 0.439                      | 0.192                                 |
|               | AVLT-Recognition | r | 0.114         | 0.071                  | -0.181                            | -0.085                     | 0.072                                 |
|               | Scores           | p | 0.213         | 0.311                  | 0.102                             | 0.275                      | 0.308                                 |
|               | MMSE             | r | 0.145         | 0.036                  | -0.136                            | -0.183                     | -0.149                                |
|               | MoCA             | p | 0.156         | 0.400                  | 0.170                             | 0.099                      | 0.148                                 |
|               |                  | r | 0.245         | 0.116                  | -0.117                            | -0.196                     | -0.081                                |
|               |                  | p | <b>0.042</b>  | 0.209                  | 0.207                             | 0.084                      | 0.286                                 |
| SCD<br>DF=36  | AVLT-Immediate   | r | 0.160         | 0.058                  | -0.291                            | -0.136                     | -0.059                                |
|               | Recall Scores    | p | 0.169         | 0.364                  | 0.038                             | 0.208                      | 0.363                                 |
|               | AVLT-Delayed     | r | 0.398         | 0.138                  | -0.339                            | -0.390                     | -0.215                                |
|               | Recall Scores    | p | <b>0.006*</b> | 0.205                  | <b>0.019</b>                      | <b>0.007*</b>              | 0.098                                 |
|               | AVLT-Recognition | r | 0.016         | 0.105                  | -0.122                            | 0.045                      | 0.139                                 |
|               | Scores           | p | 0.461         | 0.264                  | 0.233                             | 0.394                      | 0.203                                 |
|               | MMSE             | r | 0.155         | 0.349                  | -0.258                            | -0.157                     | -0.117                                |
|               | MOCA             | p | 0.177         | <b>0.016</b>           | 0.059                             | 0.174                      | 0.242                                 |
|               |                  | r | 0.076         | 0.103                  | -0.180                            | -0.124                     | 0.001                                 |
|               |                  | p | 0.325         | 0.268                  | 0.140                             | 0.230                      | 0.499                                 |
| aMCI<br>DF=42 | AVLT-Immediate   | r | 0.170         | 0.051                  | -0.239                            | -0.092                     | -0.084                                |
|               | Recall Scores    | p | 0.135         | 0.372                  | 0.059                             | 0.276                      | 0.294                                 |
|               | AVLT-Delayed     | r | 0.328         | 0.207                  | -0.423                            | -0.264                     | -0.160                                |
|               | Recall Scores    | p | <b>0.015</b>  | 0.089                  | <b>0.002*</b>                     | <b>0.042</b>               | 0.150                                 |
|               | AVLT-Recognition | r | 0.111         | 0.361                  | -0.178                            | -0.054                     | -0.137                                |
|               | Scores           | p | 0.237         | <b>0.008*</b>          | 0.124                             | 0.364                      | 0.187                                 |
|               | MMSE             | r | 0.167         | 0.290                  | -0.064                            | -0.129                     | -0.053                                |
|               | MoCA             | p | 0.139         | <b>0.028</b>           | 0.340                             | 0.202                      | 0.367                                 |
|               |                  | r | 0.211         | 0.275                  | -0.129                            | -0.115                     | -0.149                                |
|               |                  | p | 0.085         | <b>0.035</b>           | 0.201                             | 0.228                      | 0.167                                 |
| d-AD<br>DF=28 | AVLT-Immediate   | r | 0.066         | -0.143                 | -0.287                            | 0.004                      | -0.196                                |
|               | Recall Scores    | p | 0.365         | 0.225                  | 0.062                             | 0.492                      | 0.150                                 |
|               | AVLT-Delayed     | r | 0.102         | -0.003                 | -0.024                            | -0.040                     | -0.151                                |
|               | Recall Scores    | p | 0.296         | 0.493                  | 0.450                             | 0.416                      | 0.213                                 |

---

|                  |   |              |        |        |        |        |
|------------------|---|--------------|--------|--------|--------|--------|
| AVLT-Recognition | r | 0.329        | 0.071  | -0.140 | -0.302 | -0.064 |
| Scores           | p | <b>0.038</b> | 0.354  | 0.230  | 0.052  | 0.368  |
| MMSE             | r | 0.240        | 0.144  | -0.114 | -0.165 | -0.062 |
|                  | p | 0.100        | 0.225  | 0.274  | 0.192  | 0.373  |
| MoCA             | r | 0.136        | -0.068 | -0.118 | -0.097 | -0.111 |
|                  | p | 0.237        | 0.360  | 0.267  | 0.305  | 0.280  |

---

Table S27. Partial Pearson’s correlations between network topological metrics and rich club/feeder/local connectivity strength. Partial Pearson’s correlations controlled for age and gender were used to assess how network topological metrics related to rich club/feeder/local connectivity strength. The bold numbers represent significant correlations at  $P < 0.05$ . The star-labeled numbers represent significant correlations at  $P < 0.05$  after Bonferroni corrections for the number of variables (=15).

| COV: Age & Gender |                                       | Rich Club             | Feeder                | Local                 |                   |
|-------------------|---------------------------------------|-----------------------|-----------------------|-----------------------|-------------------|
|                   |                                       | Connectivity Strength | Connectivity Strength | Connectivity Strength |                   |
| DF=220            | Strength                              | r                     | 0.579                 | 0.945                 | 0.977             |
|                   |                                       | p                     | <b>&lt;0.001*</b>     | <b>&lt;0.001*</b>     | <b>&lt;0.001*</b> |
|                   | Clustering Coefficient                | r                     | 0.282                 | 0.564                 | 0.524             |
|                   |                                       | p                     | <b>&lt;0.001*</b>     | <b>&lt;0.001*</b>     | <b>&lt;0.001*</b> |
|                   | Characteristic Path Length            | r                     | -0.552                | -0.884                | -0.894            |
|                   |                                       | p                     | <b>&lt;0.001*</b>     | <b>&lt;0.001*</b>     | <b>&lt;0.001*</b> |
|                   | Normalized Clustering Coefficient     | r                     | -0.568                | -0.721                | -0.608            |
|                   |                                       | p                     | <b>&lt;0.001*</b>     | <b>&lt;0.001*</b>     | <b>&lt;0.001*</b> |
|                   | Normalized Characteristic Path Length | r                     | -0.408                | -0.341                | -0.242            |
|                   |                                       | p                     | <b>&lt;0.001*</b>     | <b>&lt;0.001*</b>     | <b>0.002*</b>     |

## Figures

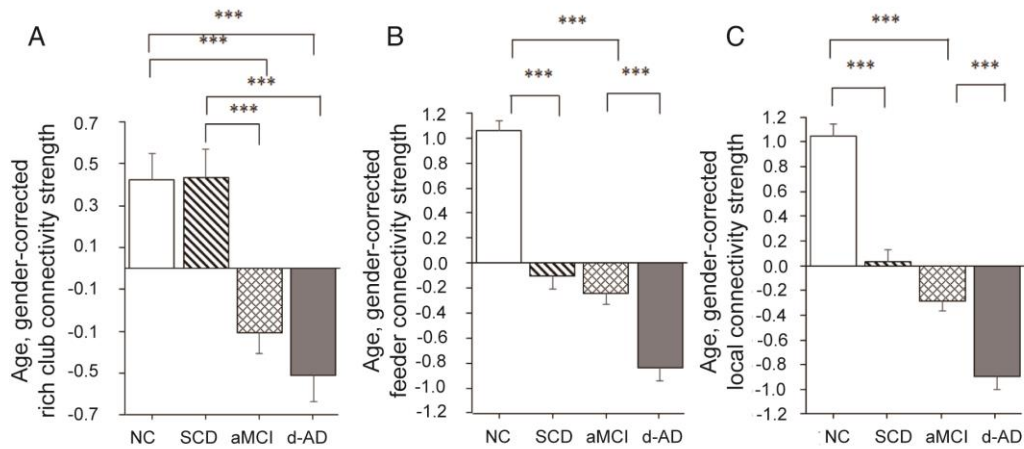

**Figure S1.** Group differences in rich club networks properties based on individual rich club selection. Bar graphs display the mean (standard error) age and gender-corrected values for (A) rich club, (B) feeder and (C) local connectivity strength (N=183). \* $P < 0.05$ , \*\* $P < 0.01$ , \*\*\* $P < 0.001$ .

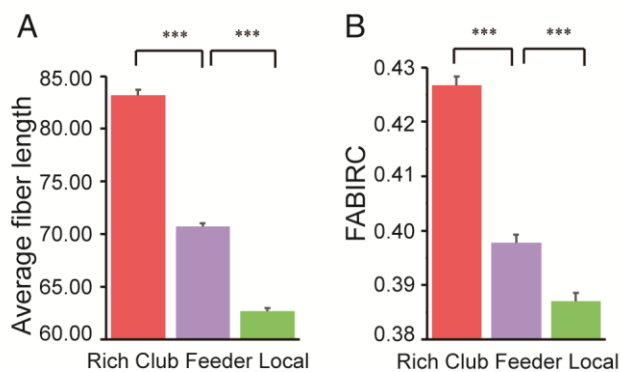

**Figure S2.** (A) Length of rich club, feeder, and local connections across all the groups of subjects (N=183). Connection length estimated from the fiber length in mm between pairs of connected nodes for each network. (B) FABIRC of rich club, feeder, and local connections across all the groups of subjects (N=183).

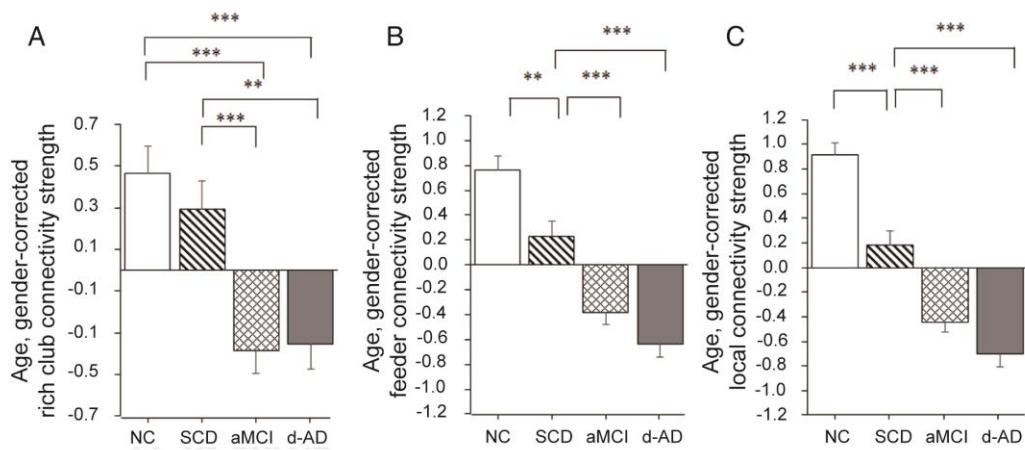

**Figure S3.** Group differences in rich club networks properties by regressing out average fiber length. Bar graphs display the mean (standard error) age and gender-corrected values for (A) rich club, (B) feeder and (C) local connectivity strength (N=183). \* $P<0.05$ , \*\* $P<0.01$ , \*\*\* $P<0.001$ .



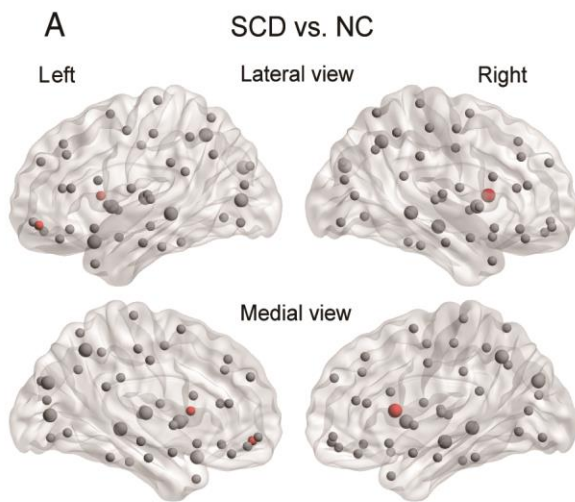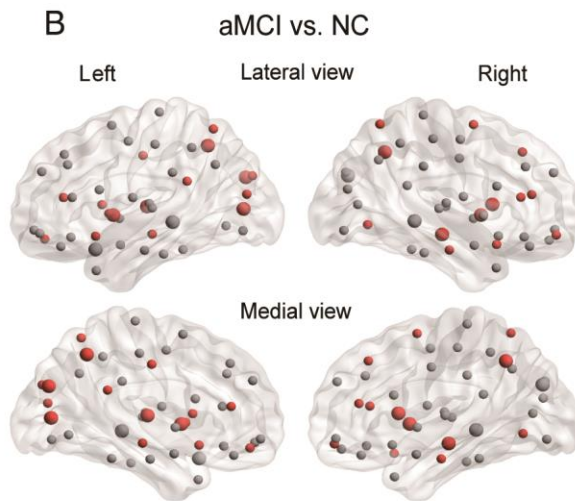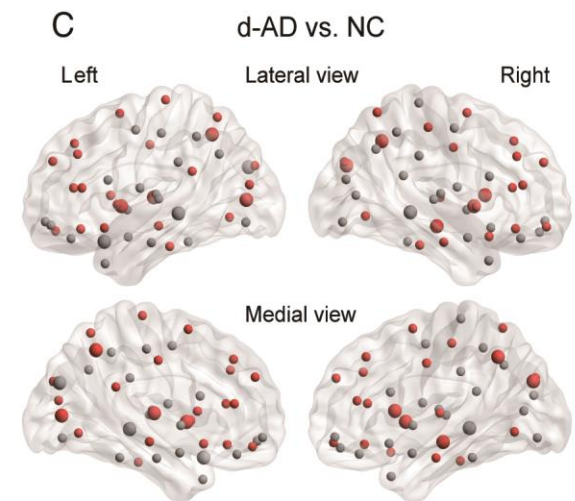

- Affected rich club regions
- Affected peripheral regions
- Unaffected rich club regions
- Unaffected peripheral regions

---

**Figure S4.** Nodes with the highest number of aberrant connections in (A) SCD, (B) aMCI, and (D) d-AD compared with NC. Nodes with the highest number of aberrant connections in each patient groups (range = 11 to 27 aberrant connections), based on two-sample t-test (NC versus each patient groups) with FDR corrected to the P values to correct for multiple comparisons across all edges. Significance was set at  $P < 0.05$ . The red nodes represent the affected nodes in each group.
